# Supplementary material for: Conserved Gene Microsynteny Unveils Functional Interaction Between Protein Disulfide Isomerase and Rho Guanine-Dissociation Inhibitor Families
Source: Sci Rep. 2017 Dec 8;7:17262. doi: 10.1038/s41598-017-16947-5 (PMC5722932; doi:10.1038/s41598-017-16947-5)
Supplement: Supplementary file 2 — Supplementary Table S-3 [file 41598_2017_16947_MOESM2_ESM.xlsx]

## Sheet: p4hb
P4hb
Homo sapiens
	on strand - = ->
	on strand + = <-
DCXR (ENSG00000169738)	17 : 82,035,136 - 82,037,732 on strand -	dicarbonyl and L-xylulose reductase
RAC3 (ENSG00000169750)	17 : 82,031,624 - 82,034,204 on strand +	ras-related C3 botulinum toxin substrate 3
LRRC45 (ENSG00000169683)	17 : 82,023,302 - 82,031,151 on strand +	leucine rich repeat containing 45
STRA13 (ENSG00000169689)	17 : 82,018,702 - 82,024,107 on strand -	stimulated by retinoic acid 13
ASPSCR1 (ENSG00000169696)	17 : 81,976,807 - 82,017,406 on strand +	ASPSCR1, UBX domain containing tether for SLC2A4
NOTUM (ENSG00000185269)	17 : 81,952,507 - 81,961,840 on strand -	NOTUM, palmitoleoyl-protein carboxylesterase
MYADML2 (ENSG00000185105)	17 : 81,939,645 - 81,947,233 on strand -	myeloid associated differentiation marker like 2
PYCR1 (ENSG00000183010)	17 : 81,932,384 - 81,942,412 on strand -	pyrroline-5-carboxylate reductase 1
MAFG (ENSG00000197063)	17 : 81,918,270 - 81,927,714 on strand -	MAF bZIP transcription factor G
SIRT7 (ENSG00000187531)	17 : 81,911,939 - 81,921,323 on strand -	sirtuin 7
PCYT2 (ENSPTRG00000009776)	17 : 81,381,089 - 81,389,754 on strand -	phosphate cytidylyltransferase 2, ethanolamine
NPB (ENSG00000183979)	17 : 81,900,745 - 81,902,905 on strand +	neuropeptide B
ANAPC11 (ENSG00000141552)	17 : 81,890,790 - 81,900,991 on strand +	anaphase promoting complex subunit 11
ALYREF (ENSG00000183684)	17 : 81,887,844 - 81,891,586 on strand -	Aly/REF export factor
ARHGDIA (ENSG00000141522)	17 : 81,867,721 - 81,871,406 on strand -	Rho GDP dissociation inhibitor alpha
P4HB (ENSG00000185624)	17 : 81,843,159 - 81,860,694 on strand -	prolyl 4-hydroxylase subunit beta
PPP1R27 (ENSG00000182676)	17 : 81,833,492 - 81,835,050 on strand -	protein phosphatase 1 regulatory subunit 27
MCRIP1 (ENSG00000225663)	17 : 81,822,361 - 81,833,302 on strand -	MAPK regulated corepressor interacting protein 1
GCGR (ENSG00000215644)	17 : 81,804,132 - 81,814,013 on strand +	glucagon receptor
SLC25A10 (ENSG00000183048)	17 : 81,712,236 - 81,721,016 on strand +	solute carrier family 25 member 10
RP13-1032I1.10 (ENSG00000262660)	17 : 81,703,371 - 81,720,539 on strand +
MRPL12 (ENSG00000262814)	17 : 81,703,357 - 81,707,526 on strand +	mitochondrial ribosomal protein L12
HGS (ENSG00000185359)	17 : 81,683,326 - 81,703,138 on strand +	hepatocyte growth factor-regulated tyrosine kinase substrate
ARL16 (ENSG00000214087)	17 : 81,681,174 - 81,683,924 on strand -	ADP ribosylation factor like GTPase 16
CCDC137 (ENSG00000185298)	17 : 81,666,364 - 81,673,904 on strand +	coiled-coil domain containing 137
OXLD1 (ENSG00000204237)	17 : 81,665,036 - 81,666,635 on strand -	oxidoreductase like domain containing 1
PDE6G (ENSG00000185527)	17 : 81,650,459 - 81,663,112 on strand -	phosphodiesterase 6G
TSPAN10 (ENSG00000182612)	17 : 81,637,171 - 81,648,749 on strand +	tetraspanin 10 [
NPLOC4 (ENSG00000182446)	17 : 81,556,887 - 81,648,465 on strand -	NPL4 homolog, ubiquitin recognition factor
FAAP100 (ENSG00000185504)	17 : 81,539,885 - 81,553,961 on strand -	Fanconi anemia core complex associated protein 100
FSCN2 (ENSG00000186765)	17 : 81,528,396 - 81,537,130 on strand +	fascin actin-bundling protein 2, retinal
Orangutan
	on strand - = ->
	on strand + = <-
		dicarbonyl and L-xylulose reductase
		ras-related C3 botulinum toxin substrate 3
LRRC45 (ENSPPYG00000008762)	17 : 72,118,231 - 72,125,693 on strand +	leucine rich repeat containing 45
STRA13 (ENSPPYG00000008761)	17 : 72,113,293 - 72,117,485 on strand -	Pongo abelii basic helix-loop-helix family, member e40 (BHLHB2), mRNA
ASPSCR1 (ENSPPYG00000008760)	17 : 72,071,617 - 72,112,056 on strand +	ASPSCR1, UBX domain containing tether for SLC2A4
ENSPPYG00000008759	17 : 72,058,768 - 72,058,938 on strand -
NOTUM (ENSPPYG00000008758)	17 : 72,046,940 - 72,053,215 on strand -	NOTUM, palmitoleoyl-protein carboxylesterase
ENSPPYG00000008757	17 : 72,046,745 - 72,047,032 on strand +
MYADML2 (ENSPPYG00000008756)	17 : 72,034,539 - 72,035,450 on strand -	myeloid associated differentiation marker like 2
PYCR1 (ENSPPYG00000008755)	17 : 72,025,923 - 72,031,272 on strand -	pyrroline-5-carboxylate reductase 1
MAFG (ENSPPYG00000008754)	17 : 72,016,903 - 72,017,482 on strand -	MAF bZIP transcription factor G
ENSPPYG00000008753	17 : 72,008,699 - 72,012,440 on strand -
NPB (ENSPPYG00000008751)	17 : 71,995,983 - 71,996,451 on strand +	neuropeptide B
PCYT2 (ENSPPYG00000008752)	17 : 71,994,710 - 72,004,949 on strand -	phosphate cytidylyltransferase 2, ethanolamine
ENSPPYG00000008750	17 : 71,985,231 - 71,994,191 on strand +
ALYREF (ENSPPYG00000008749)	17 : 71,981,641 - 71,985,911 on strand -	Aly/REF export factor
ARHGDIA (ENSPPYG00000008748)	17 : 71,958,125 - 71,961,548 on strand -	Rho GDP dissociation inhibitor alpha
P4HB (ENSPPYG00000008747)	17 : 71,929,811 - 71,950,199 on strand -	protein disulfide-isomerase precursor
PPP1R27 (ENSPPYG00000008746)	17 : 71,921,226 - 71,922,270 on strand -	protein phosphatase 1 regulatory subunit 27
MCRIP1 (ENSPPYG00000029430)	17 : 71,908,634 - 71,913,883 on strand -	MAPK regulated corepressor interacting protein 1
GCGR (ENSPPYG00000029603)	17 : 71,895,544 - 71,899,211 on strand +	glucagon receptor [
SLC25A10 (ENSPPYG00000008745)	17 : 71,820,145 - 71,829,278 on strand +	solute carrier family 25 member 10
MRPL12 (ENSPPYG00000008744)	17 : 71,810,800 - 71,816,469 on strand +	mitochondrial ribosomal protein L12
HGS (ENSPPYG00000008743)	17 : 71,790,910 - 71,808,877 on strand +	hepatocyte growth factor-regulated tyrosine kinase substrate
ARL16 (ENSPPYG00000008742)	17 : 71,786,871 - 71,790,668 on strand -	ADP ribosylation factor like GTPase 16
CCDC137 (ENSPPYG00000008741)	17 : 71,773,424 - 71,782,537 on strand +	coiled-coil domain containing 137
OXLD1 (ENSPPYG00000008740)	17 : 71,771,850 - 71,773,234 on strand -	oxidoreductase like domain containing 1
PDE6G (ENSPPYG00000008739)	17 : 71,755,347 - 71,761,482 on strand -	phosphodiesterase 6G
TSPAN10 (ENSPPYG00000008738)	17 : 71,747,283 - 71,753,326 on strand +	tetraspanin 10
NPLOC4 (ENSPPYG00000008737)	17 : 71,660,257 - 71,754,382 on strand -	NPL4 homolog, ubiquitin recognition factor
FAAP100 (ENSPPYG00000008736)	17 : 71,637,856 - 71,649,918 on strand -	Fanconi anemia core complex associated protein 100
ACTG1 (ENSPPYG00000008735)	17 : 71,610,848 - 71,612,507 on strand -	actin gamma 1
BAHCC1 (ENSPPYG00000008734)	17 : 71,534,232 - 71,552,983 on strand +	BAH domain and coiled-coil containing 1
Rhesus
	on strand - = ->
	on strand + = <-
DCXR (ENSMMUG00000010896)	16 : 75,876,040 - 75,878,578 on strand -	dicarbonyl and L-xylulose reductase
RAC3 (ENSMMUG00000010895)	16 : 75,872,795 - 75,875,126 on strand +	ras-related C3 botulinum toxin substrate 3 (rho family, small GTP binding protein Rac3)
ENSMMUG00000010892	16 : 75,864,341 - 75,872,202 on strand +
STRA13 (ENSMMUG00000010890)	16 : 75,859,678 - 75,863,974 on strand -	stimulated by retinoic acid 13
ASPSCR1 (ENSMMUG00000010887)	16 : 75,813,919 - 75,858,431 on strand +	ASPSCR1, UBX domain containing tether for SLC2A4
MYADML2 (ENSMMUG00000012898)	16 : 75,771,551 - 75,774,546 on strand -	myeloid associated differentiation marker like 2
PYCR1 (ENSMMUG00000012895)	16 : 75,764,016 - 75,774,291 on strand -	pyrroline-5-carboxylate reductase 1
MAFG (ENSMMUG00000012893)	16 : 75,752,852 - 75,755,247 on strand -	MAF bZIP transcription factor G
ENSMMUG00000046433	16 : 75,750,672 - 75,750,923 on strand -
SIRT7 (ENSMMUG00000012890)	16 : 75,742,925 - 75,749,765 on strand -	sirtuin 7
PCYT2 (ENSMMUG00000012889)	16 : 75,733,905 - 75,742,334 on strand -	phosphate cytidylyltransferase 2, ethanolamine
NPB (ENSMMUG00000012888)	16 : 75,733,435 - 75,733,908 on strand +	neuropeptide B
ANAPC11 (ENSMMUG00000012887	16 : 75,722,460 - 75,733,140 on strand +	anaphase promoting complex subunit 11
ALYREF (ENSMMUG00000012884)	16 : 75,718,520 - 75,722,327 on strand -	Aly/REF export factor
ARHGDIA (ENSMMUG00000009949)	16 : 75,693,572 - 75,700,328 on strand -	Rho GDP dissociation inhibitor alpha
P4HB (ENSMMUG00000009242)	16 : 75,665,454 - 75,686,252 on strand -	prolyl 4-hydroxylase subunit beta
PPP1R27 (ENSMMUG00000009243)	16 : 75,656,972 - 75,659,067 on strand -	protein phosphatase 1 regulatory subunit 27
ENSMMUG00000039872	16 : 75,656,131 - 75,656,355 on strand -
MCRIP1 (ENSMMUG00000000258)	16 : 75,645,584 - 75,649,526 on strand -	MAPK regulated corepressor interacting protein 1
GCGR (ENSMMUG00000000256)	16 : 75,628,929 - 75,638,038 on strand +	glucagon receptor
ENSMMUG00000004457	16 : 75,574,132 - 75,600,714 on strand +
HGS (ENSMMUG00000008833)	16 : 75,550,913 - 75,573,668 on strand +	hepatocyte growth factor-regulated tyrosine kinase substrate
ARL16 (ENSMMUG00000045575)	16 : 75,548,451 - 75,550,745 on strand -	ADP ribosylation factor like GTPase 16
CCDC137 (ENSMMUG00000008831)	16 : 75,529,726 - 75,539,266 on strand +	coiled-coil domain containing 137
OXLD1 (ENSMMUG00000008830)	16 : 75,527,968 - 75,529,493 on strand -	oxidoreductase like domain containing 1
ENSMMUG00000047080	16 : 75,513,080 - 75,518,394 on strand -
TSPAN10	16 : 75,499,209 - 75,511,148 on strand +	tetraspanin 10
NPLOC4 (ENSMMUG00000001586)	16 : 75,413,444 - 75,499,164 on strand -	NPL4 homolog, ubiquitin recognition factor
C17orf70 (ENSMMUG00000001585)	16 : 75,397,188 - 75,409,833 on strand -	Fanconi anemia core complex associated protein 100
FSCN2 (ENSMMUG00000001583)	16 : 75,389,117 - 75,396,279 on strand +	fascin actin-bundling protein 2, retinal
ACTG1 (ENSMMUG00000012054)	16 : 75,370,206 - 75,384,378 on strand -	actin gamma 1
Mouse
	on strand - = ->
	on strand + = <-
Dcxr (ENSMUSG00000039450)	11 : 120,725,399 - 120,727,281 on strand -	dicarbonyl L-xylulose reductase
Rac3 (ENSMUSG00000018012)	11 : 120,721,470 - 120,723,969 on strand +	RAS-related C3 botulinum substrate 3
Lrrc45 (ENSMUSG00000025145)	11 : 120,713,925 - 120,721,128 on strand +	leucine rich repeat containing 45
Stra13 (ENSMUSG00000025144)	11 : 120,710,942 - 120,713,738 on strand -	stimulated by retinoic acid 13
Aspscr1 (ENSMUSG00000025142)	11 : 120,672,973 - 120,709,447 on strand +	alveolar soft part sarcoma chromosome region, candidate 1
Notum (ENSMUSG00000042988)	11 : 120,653,788 - 120,661,175 on strand -	notum pectinacetylesterase homolog (Drosophila)
Myadml2 (ENSMUSG00000025141)	11 : 120,646,031 - 120,648,158 on strand -	myeloid-associated differentiation marker-like 2
Pycr1 (ENSMUSG00000025140)	11 : 120,635,712 - 120,643,769 on strand -	pyrroline-5-carboxylate reductase 1
Mafg (ENSMUSG00000051510)	11 : 120,625,117 - 120,633,600 on strand -	v-maf musculoaponeurotic fibrosarcoma oncogene family, protein G (avian)
Sirt7 (ENSMUSG00000025138)	11 : 120,618,372 - 120,625,240 on strand -	sirtuin 7
Pcyt2 (ENSMUSG00000025137)	11 : 120,610,087 - 120,617,936 on strand -	phosphate cytidylyltransferase 2, ethanolamine
Npb (ENSMUSG00000044034)	11 : 120,608,477 - 120,609,093 on strand +	neuropeptide B
Anapc11 (ENSMUSG00000025135)	11 : 120,598,421 - 120,608,198 on strand +	anaphase promoting complex subunit 11
Alyref (ENSMUSG00000025134)	11 : 120,592,121 - 120,598,365 on strand -	Aly/REF export factor
Arhgdia (ENSMUSG00000025132)	11 : 120,578,104 - 120,581,624 on strand -	Rho GDP dissociation inhibitor (GDI) alpha
P4hb (ENSMUSG00000025130)	11 : 120,560,298 - 120,573,253 on strand -	prolyl 4-hydroxylase, beta polypeptide
Ppp1r27 (ENSMUSG00000025129)	11 : 120,549,979 - 120,551,132 on strand -	protein phosphatase 1, regulatory subunit 27
Fam195b (ENSMUSG00000061111)	11 : 120,542,888 - 120,549,727 on strand -	family with sequence similarity 195, member B
Gcgr (ENSMUSG00000025127)	11 : 120,530,699 - 120,538,986 on strand +	glucagon receptor
Slc25a10 (ENSMUSG00000025792)	11 : 120,491,840 - 120,499,187 on strand +	solute carrier family 25 (mitochondrial carrier, dicarboxylate transporter), member 10
Mrpl12 (ENSMUSG00000039640)	11 : 120,484,613 - 120,489,065 on strand +	mitochondrial ribosomal protein L12
Hgs (ENSMUSG00000025793)	11 : 120,467,635 - 120,483,984 on strand +	HGF-regulated tyrosine kinase substrate
Arl16 (ENSMUSG00000057594)	11 : 120,464,866 - 120,467,607 on strand -	ADP-ribosylation factor-like 16 [
Ccdc137 (ENSMUSG00000049957)	11 : 120,458,115 - 120,464,358 on strand +	coiled-coil domain containing 137
Oxld1 (ENSMUSG00000039670)	11 : 120,456,606 - 120,458,068 on strand -	oxidoreductase like domain containing 1
Pde6g (ENSMUSG00000025386)	11 : 120,447,605 - 120,453,500 on strand -	phosphodiesterase 6G, cGMP-specific, rod, gamma
Tspan10 (ENSMUSG00000039691)	11 : 120,442,644 - 120,446,950 on strand +	tetraspanin 10
Nploc4 (ENSMUSG00000039703)	11 : 120,380,370 - 120,437,708 on strand -	NPL4 homolog, ubiquitin recognition factor
Faap100 (ENSMUSG00000025384)	11 : 120,369,055 - 120,378,764 on strand -	Fanconi anemia core complex associated protein 100
Fscn2 (ENSMUSG00000025380)	11 : 120,361,534 - 120,368,168 on strand +	fascin actin-bundling protein 2
0610009L18Rik (ENSMUSG00000043644)	11 : 120,348,678 - 120,351,190 on strand +	RIKEN cDNA 0610009L18 gene
Dolphim
NOTUM (ENSTTRG00000012283)	GeneScaffold_3624 : 112,405 - 118,091 on strand -	NOTUM, palmitoleoyl-protein carboxylesterase
MYADML2 (ENSTTRG00000012282)	GeneScaffold_3624 : 102,070 - 102,840 on strand -	myeloid associated differentiation marker like 2
PYCR1 (ENSTTRG00000012281)	GeneScaffold_3624 : 94,937 - 98,251 on strand -	pyrroline-5-carboxylate reductase 1 [
MAFG (ENSTTRG00000012280)	GeneScaffold_3624 : 85,827 - 86,411 on strand -	MAF bZIP transcription factor G
SIRT7 (ENSTTRG00000012279)	GeneScaffold_3624 : 74,158 - 80,562 on strand -	sirtuin 7
PCYT2 (ENSTTRG00000012278)	GeneScaffold_3624 : 66,597 - 73,324 on strand -	phosphate cytidylyltransferase 2, ethanolamine
ANAPC11 (ENSTTRG00000012276)	GeneScaffold_3624 : 56,537 - 60,678 on strand +	anaphase promoting complex subunit 11
ALYREF (ENSTTRG00000012275)	GeneScaffold_3624 : 52,349 - 55,751 on strand -	Aly/REF export factor
ARHGDIA (ENSTTRG00000012274	GeneScaffold_3624 : 33,224 - 34,410 on strand -	Rho GDP dissociation inhibitor alpha
P4HB (ENSTTRG00000012273)	GeneScaffold_3624 : 15,925 - 26,309 on strand -	prolyl 4-hydroxylase subunit beta
PPP1R27 (ENSTTRG00000012272)	GeneScaffold_3624 : 9,183 - 10,010 on strand -	protein phosphatase 1 regulatory subunit 27
Guinea Pig
	on strand - = ->
	on strand + = <-
ENSCPOG00000013863	scaffold_76 : 6,425,583 - 6,427,399 on strand -
DCXR (ENSCPOG00000026566)	scaffold_76 : 6,421,447 - 6,423,040 on strand -	dicarbonyl and L-xylulose reductase
RAC3 (ENSCPOG00000013861)	scaffold_76 : 6,417,849 - 6,419,831 on strand +	ras-related C3 botulinum toxin substrate 3
LRRC45 (ENSCPOG00000013857)	scaffold_76 : 6,410,696 - 6,417,181 on strand +	leucine rich repeat containing 45
STRA13 (ENSCPOG00000022320)	scaffold_76 : 6,408,368 - 6,410,061 on strand -	stimulated by retinoic acid 13
ASPSCR1 (ENSCPOG00000014896)	scaffold_76 : 6,367,996 - 6,406,990 on strand +	ASPSCR1, UBX domain containing tether for SLC2A4
NOTUM (ENSCPOG00000012400)	scaffold_76 : 6,350,177 - 6,356,693 on strand -	NOTUM, palmitoleoyl-protein carboxylesterase
MYADML2 (ENSCPOG00000002048)	scaffold_76 : 6,330,579 - 6,331,487 on strand -	myeloid associated differentiation marker like 2
PYCR1 (ENSCPOG00000002045)	scaffold_76 : 6,324,229 - 6,327,440 on strand -	pyrroline-5-carboxylate reductase 1
MAFG (ENSCPOG00000001838)	scaffold_76 : 6,312,889 - 6,313,470 on strand -	MAF bZIP transcription factor G
SIRT7 (ENSCPOG00000001834)	scaffold_76 : 6,302,502 - 6,308,452 on strand -	sirtuin 7
PCYT2 (ENSCPOG00000001826)	scaffold_76 : 6,295,626 - 6,301,873 on strand -	phosphate cytidylyltransferase 2, ethanolamine
ENSCPOG00000013713	scaffold_76 : 6,286,645 - 6,290,899 on strand +
ALYREF (ENSCPOG00000013710)	scaffold_76 : 6,282,118 - 6,285,295 on strand -	Aly/REF export factor
ARHGDIA (ENSCPOG00000001832)	scaffold_76 : 6,266,099 - 6,267,280 on strand -	Rho GDP dissociation inhibitor alpha
P4HB (ENSCPOG00000012247)	scaffold_76 : 6,246,586 - 6,256,627 on strand -	prolyl 4-hydroxylase subunit beta
PPP1R27 (ENSCPOG00000015239)	scaffold_76 : 6,237,387 - 6,238,242 on strand -	protein phosphatase 1 regulatory subunit 27
MCRIP1 (ENSCPOG00000021139)	scaffold_76 : 6,230,733 - 6,233,760 on strand -	MAPK regulated corepressor interacting protein 1
GCGR (ENSCPOG00000025298)	scaffold_76 : 6,222,685 - 6,226,092 on strand +	glucagon receptor
SLC25A10 (ENSCPOG00000013620)	scaffold_76 : 6,161,707 - 6,168,243 on strand +	solute carrier family 25 member 10
MRPL12 (ENSCPOG00000021500)	scaffold_76 : 6,154,183 - 6,157,875 on strand +	mitochondrial ribosomal protein L12
HGS (ENSCPOG00000020715)	scaffold_76 : 6,141,045 - 6,152,543 on strand +	hepatocyte growth factor-regulated tyrosine kinase substrate [
ARL16 (ENSCPOG00000020035)	scaffold_76 : 6,138,648 - 6,140,769 on strand -	ADP ribosylation factor like GTPase 16
CCDC137 (ENSCPOG00000012535)	scaffold_76 : 6,126,737 - 6,132,781 on strand +	coiled-coil domain containing 137
ENSCPOG00000012543	scaffold_76 : 6,125,836 - 6,126,057 on strand -
PDE6G (ENSCPOG00000022389	scaffold_76 : 6,118,354 - 6,120,339 on strand -	phosphodiesterase 6G
TSPAN10 (ENSCPOG00000022223)	scaffold_76 : 6,111,761 - 6,116,272 on strand +	tetraspanin 10
NPLOC4 (ENSCPOG00000007800)	scaffold_76 : 6,050,942 - 6,094,968 on strand -	NPL4 homolog, ubiquitin recognition factor
FAAP100 (ENSCPOG00000001797)	scaffold_76 : 6,038,096 - 6,046,458 on strand -	Fanconi anemia core complex associated protein 100
FSCN2 (ENSCPOG00000007000)	scaffold_76 : 6,029,911 - 6,036,025 on strand +	ascin actin-bundling protein 2, retinal
ACTG1 (ENSCPOG00000012101)	scaffold_76 : 6,015,646 - 6,017,736 on strand -	actin gamma 1
Dog
	on strand - = ->
	on strand + = <-
ENSCAFG00000005922	9 : 294,061 - 295,014 on strand -
LRRC45 (ENSCAFG00000005915)	9 : 295,191 - 303,234 on strand -	leucine rich repeat containing 45
STRA13 (ENSCAFG00000031265)	9 : 305,858 - 306,454 on strand +	stimulated by retinoic acid 13
ASPSCR1 (ENSCAFG00000005830)	9 : 308,181 - 331,161 on strand -	ASPSCR1, UBX domain containing tether for SLC2A4
TSPAN10 (ENSCAFG00000005765)	9 : 323,014 - 532,515 on strand -	tetraspanin 10
NOTUM (ENSCAFG00000005913)	9 : 344,687 - 350,368 on strand +	NOTUM, palmitoleoyl-protein carboxylesterase
MYADML2 (ENSCAFG00000005911)	9 : 355,954 - 356,877 on strand +	myeloid associated differentiation marker like 2
PYCR1 (ENSCAFG00000005906)	9 : 360,665 - 364,129 on strand +	pyrroline-5-carboxylate reductase 1
MAFG (ENSCAFG00000005893)	9 : 372,216 - 372,797 on strand +	MAF bZIP transcription factor G
SIRT7 (ENSCAFG00000005891)	9 : 377,198 - 382,909 on strand +	sirtuin 7
PCYT2 (ENSCAFG00000005882)	9 : 383,744 - 443,026 on strand +	phosphate cytidylyltransferase 2, ethanolamine
NPB (ENSCAFG00000029214)	9 : 391,781 - 392,314 on strand -	neuropeptide B
ENSCAFG00000005878	9 : 394,070 - 397,948 on strand -
ALYREF (ENSCAFG00000005877)	9 : 399,092 - 402,796 on strand +	Aly/REF export factor
ARHGDIA (ENSCAFG00000005872)	9 : 420,806 - 422,066 on strand +	Rho GDP dissociation inhibitor alpha
P4HB (ENSCAFG00000005859)	9 : 427,878 - 437,440 on strand +	prolyl 4-hydroxylase subunit beta
PPP1R27 (ENSCAFG00000005853)	9 : 441,775 - 442,602 on strand +	protein phosphatase 1 regulatory subunit 27
MCRIP1 (ENSCAFG00000005850)	9 : 449,433 - 450,382 on strand +	MAPK regulated corepressor interacting protein 1
GCGR (ENSCAFG00000005846)	9 : 455,957 - 459,409 on strand -	glucagon receptor
ENSCAFG00000005812	9 : 484,749 - 498,131 on strand -
HGS (ENSCAFG00000005789)	9 : 499,552 - 513,565 on strand -	hepatocyte growth factor-regulated tyrosine kinase substrate
ARL16 (ENSCAFG00000024784)	9 : 513,466 - 515,314 on strand +	ADP ribosylation factor like GTPase 16
CCDC137 (ENSCAFG00000005770)	9 : 518,336 - 522,744 on strand -	coiled-coil domain containing 137
OXLD1 (ENSCAFG00000024663)	9 : 522,878 - 523,896 on strand +	oxidoreductase like domain containing 1
PDE6G (ENSCAFG00000005767)	9 : 526,577 - 529,389 on strand +	Retinal rod rhodopsin-sensitive cGMP 3',5'-cyclic phosphodiesterase subunit gamma
NPLOC4 (ENSCAFG00000005759)	9 : 542,206 - 606,907 on strand +	NPL4 homolog, ubiquitin recognition factor
ENSCAFG00000030278	9 : 552,549 - 553,127 on strand -
FAAP100 (ENSCAFG00000005752)	9 : 607,103 - 615,159 on strand +	Fanconi anemia core complex associated protein 100
FSCN2 (ENSCAFG00000005745)	9 : 617,609 - 621,882 on strand -	fascin actin-bundling protein 2, retinal
ACTG1 (ENSCAFG00000005734)	9 : 635,976 - 637,805 on strand +	actin, cytoplasmic 2
BAHCC1 (ENSCAFG00000005732)	9 : 681,631 - 704,087 on strand -	BAH domain and coiled-coil containing 1
Microbat
	on strand - = ->
	on strand + = <-
SIRT7 (ENSMLUG00000010150)	GL431312 : 1,062 - 3,811 on strand +	sirtuin 7
PCYT2 (ENSMLUG00000025217)	GL431312 : 4,769 - 10,039 on strand +	phosphate cytidylyltransferase 2, ethanolamine
ENSMLUG00000028080	GL431312 : 15,085 - 18,096 on strand -	Uncharacterized protein
ENSMLUG00000009555	GL431312 : 18,037 - 21,459 on strand +	Uncharacterized protein [
ARHGDIA (ENSMLUG00000027566)	GL431312 : 31,179 - 32,095 on strand +	Rho GDP dissociation inhibitor alpha [
P4HB (ENSMLUG00000029371)	GL431312 : 38,640 - 46,701 on strand +	prolyl 4-hydroxylase subunit beta
PPP1R27 (ENSMLUG00000015901)	GL431312 : 51,384 - 52,210 on strand +	protein phosphatase 1 regulatory subunit 27
Megabat
	on strand - = ->
	on strand + = <-
MYADML2 (ENSPVAG00000017877)	scaffold_6304 : 98,133 - 98,883 on strand -	myeloid associated differentiation marker like 2
PYCR1 (ENSPVAG00000017874)	scaffold_6304 : 91,422 - 94,666 on strand -	pyrroline-5-carboxylate reductase 1
MAFG (ENSPVAG00000017873)	scaffold_6304 : 84,522 - 85,399 on strand -	MAF bZIP transcription factor G
SIRT7 (ENSPVAG00000017872)	scaffold_6304 : 75,516 - 80,697 on strand -	sirtuin 7
PCYT2 (ENSPVAG00000017868)	scaffold_6304 : 68,848 - 74,664 on strand -	phosphate cytidylyltransferase 2, ethanolamine
NPB (ENSPVAG00000017867)	scaffold_6304 : 66,138 - 66,655 on strand	neuropeptide B
ALYREF (ENSPVAG00000017866)	scaffold_6304 : 55,528 - 58,941 on strand -	Aly/REF export factor
ARHGDIA (ENSPVAG00000017865)	scaffold_6304 : 43,106 - 44,281 on strand -	Rho GDP dissociation inhibitor alpha
P4HB (ENSPVAG00000017864)	scaffold_6304 : 28,056 - 36,949 on strand -	prolyl 4-hydroxylase subunit beta
PPP1R27 (ENSPVAG00000017863)	scaffold_6304 : 22,375 - 23,226 on strand -	protein phosphatase 1 regulatory subunit 27
Opossum
	on strand - = ->
	on strand + = <-
GPS1 (ENSMODG00000003331)	2 : 231,200,558 - 231,207,710 on strand -	G protein pathway suppressor 1
ENSMODG00000003286	2 : 231,208,119 - 231,235,245 on strand +	Uncharacterized protein
ENSMODG00000003267	2 : 231,306,172 - 231,317,924 on strand +
ENSMODG00000003255	2 : 231,342,009 - 231,347,245 on strand +
RAC3 (ENSMODG00000003244)	2 : 231,348,214 - 231,350,918 on strand -	ras-related C3 botulinum toxin substrate 3 (rho family, small GTP binding protein Rac3)
LRRC45 (ENSMODG00000003220)	2 : 231,353,021 - 231,534,300 on strand -	leucine rich repeat containing 45
NOTUM (ENSMODG00000003147)	2 : 231,610,308 - 231,624,167 on strand +	NOTUM, palmitoleoyl-protein carboxylesterase
MYADML2 (ENSMODG00000003130)	2 : 231,740,961 - 231,741,872 on strand +	myeloid associated differentiation marker like 2
PYCR1 (ENSMODG00000003122)	2 : 231,794,533 - 231,802,037 on strand +	pyrroline-5-carboxylate reductase 1
MAFG (ENSMODG00000003081)	2 : 231,869,418 - 231,870,023 on strand +	MAF bZIP transcription factor G
SIRT7 (ENSMODG00000003076)	2 : 231,875,394 - 231,885,033 on strand +	sirtuin 7
PCYT2 (ENSMODG00000003065)	2 : 231,885,277 - 231,897,296 on strand +	phosphate cytidylyltransferase 2, ethanolamine
NPB (ENSMODG00000003041)	2 : 231,907,631 - 231,908,172 on strand -	neuropeptide B
ALYREF (ENSMODG00000003030)	2 : 231,926,789 - 231,930,262 on strand +	Aly/REF export factor
ARHGDIA (ENSMODG00000003014)	2 : 232,003,750 - 232,013,259 on strand +	Rho GDP dissociation inhibitor alpha
P4HB (ENSMODG00000003000)	2 : 232,042,470 - 232,069,056 on strand +	prolyl 4-hydroxylase subunit beta
ENSMODG00000002923	2 : 232,089,689 - 232,106,159 on strand +
GCGR (ENSMODG00000002961)	2 : 232,139,911 - 232,169,209 on strand -	glucagon receptor
ENSMODG00000002920	2 : 232,216,828 - 232,240,992 on strand -
MRPL12 (ENSMODG00000002902	2 : 232,248,150 - 232,260,905 on strand -	mitochondrial ribosomal protein L12
ENSMODG00000025675	2 : 232,285,338 - 232,314,723 on strand -	Uncharacterized protein
HGS (ENSMODG00000002800)	2 : 232,320,928 - 232,349,893 on strand -	hepatocyte growth factor-regulated tyrosine kinase substrate
ARL16 (ENSMODG00000002754)	2 : 232,349,344 - 232,356,246 on strand +	ADP ribosylation factor like GTPase 16
CCDC137 (ENSMODG00000002713)	2 : 232,407,432 - 232,426,009 on strand -	coiled-coil domain containing 137
PDE6G (ENSMODG00000002709)	2 : 232,425,809 - 232,460,270 on strand +	phosphodiesterase 6G
TSPAN10 (ENSMODG00000002699)	2 : 232,467,670 - 232,497,873 on strand -	tetraspanin 10
ENSMODG00000002690	2 : 232,530,281 - 232,581,955 on strand +	Uncharacterized protein
FAAP100 (ENSMODG00000002672)	2 : 232,650,105 - 232,680,364 on strand +	Fanconi anemia core complex associated protein 100
FSCN2 (ENSMODG00000002662)	2 : 232,733,680 - 232,752,176 on strand -	fascin actin-bundling protein 2, retinal
ACTG1 (ENSMODG00000002647)	2 : 232,824,291 - 232,826,095 on strand +	actin gamma 1 [
BAHCC1 (ENSMODG00000002637)	2 : 232,960,209 - 233,118,578 on strand -	BAH domain and coiled-coil containing 1
Duplicação e especiação
ENSMODG00000009342	1 : 90,452,560 - 90,453,363 on strand +	Uncharacterized protein
NANOS1 (ENSMODG00000009319)	1 : 90,085,791 - 90,086,639 on strand -	nanos C2HC-type zinc finger 1
EIF3A (ENSMODG00000009316)	1 : 90,043,254 - 90,076,972 on strand +	eukaryotic translation initiation factor 3 subunit A
FAM45A (ENSMODG00000009292)	1 : 89,999,902 - 90,025,065 on strand -	family with sequence similarity 45 member A
PRDX3 (ENSMODG00000009286)	1 : 89,947,223 - 89,955,479 on strand +	peroxiredoxin 3
GRK5 (ENSMODG00000009266)	1 : 89,594,292 - 89,922,742 on strand -	G protein-coupled receptor kinase 5
ENSMODG00000029448	1 : 89,575,274 - 89,577,008 on strand +	Uncharacterized protein
ENSMODG00000024855	1 : 89,495,878 - 89,496,339 on strand -	Uncharacterized protein
RGS10 (ENSMODG00000008876)	1 : 89,408,755 - 89,487,306 on strand +	regulator of G-protein signaling 10
TIAL1 (ENSMODG00000008865)	1 : 89,360,718 - 89,379,354 on strand +	TIA1 cytotoxic granule-associated RNA binding protein-like 1
BAG3 (ENSMODG00000008764)	1 : 89,269,526 - 89,305,162 on strand -	BCL2 associated athanogene 3
INPP5F (ENSMODG00000008751)	1 : 89,050,059 - 89,160,397 on strand -	inositol polyphosphate-5-phosphatase F
MCMBP (ENSMODG00000008714)	1 : 89,017,439 - 89,049,417 on strand +	minichromosome maintenance complex binding protein
SEC23IP (ENSMODG00000008685)	1 : 88,967,824 - 89,003,385 on strand -	SEC23 interacting protein
PLPP4 (ENSMODG00000008644)	1 : 88,031,885 - 88,247,183 on strand -	phospholipid phosphatase 4
ENSMODG00000008634	1 : 87,760,616 - 87,762,148 on strand -	Uncharacterized protein
WDR11 (ENSMODG00000008627)	1 : 87,549,962 - 87,653,010 on strand -	WD repeat domain 11
FGFR2 (ENSMODG00000008525)	1 : 86,664,719 - 86,788,014 on strand +	fibroblast growth factor receptor 2
ENSMODG00000008447	1 : 86,341,061 - 86,341,789 on strand -	Uncharacterized protein
ATE1 (ENSMODG00000008434)	1 : 86,198,919 - 86,458,019 on strand +	arginyltransferase 1
ENSMODG00000008414	1 : 86,183,583 - 86,184,975 on strand +	Uncharacterized protein
ENSMODG00000008405	1 : 86,121,338 - 86,168,045 on strand +	Uncharacterized protein
TACC2 (ENSMODG00000008327)	1 : 85,802,697 - 86,122,333 on strand -	transforming acidic coiled-coil containing protein 2
BTBD16 (ENSMODG00000008285)	1 : 85,671,949 - 85,798,549 on strand -	BTB domain containing 16
ENSMODG00000028165	1 : 85,631,118 - 85,632,278 on strand +	Uncharacterized protein
PLEKHA1 (ENSMODG00000008263)	1 : 85,512,037 - 85,596,421 on strand -	pleckstrin homology domain containing A1
HTRA1 (ENSMODG00000008235)	1 : 85,392,806 - 85,477,409 on strand -	HtrA serine peptidase 1
ENSMODG00000029063	1 : 85,322,535 - 85,329,695 on strand -
ENSMODG00000029791	1 : 85,298,324 - 85,304,287 on strand -
ENSMODG00000008170	1 : 85,178,217 - 85,270,431 on strand -
ENSMODG00000027333	1 : 85,146,199 - 85,155,658 on strand -	Uncharacterized protein
Chicken
Gallus gallus	on strand - = ->
	on strand + = <-
ABCC3 (ENSGALG00000007522)	8 : 10,231,908 - 10,275,081 on strand -	ATP binding cassette subfamily C member 3
ANKRD40 (ENSGALG00000007389)	18 : 10,224,312 - 10,230,962 on strand +	Gallus gallus ankyrin repeat domain 40 (ANKRD40), mRNA.
LUC7L3 (ENSGALG00000007386)	18 : 10,210,389 - 10,223,581 on strand -	Gallus gallus LUC7-like 3 pre-mRNA splicing factor (LUC7L3), mRNA.
ENSGALG00000026189	18 : 10,204,919 - 10,208,415 on strand +
WFIKKN2 (ENSGALG00000007367)	18 : 10,189,967 - 10,193,843 on strand -	WAP, follistatin/kazal, immunoglobulin, kunitz and netrin domain containing 2
TOB1 (ENSGALG00000007364)	18 : 10,170,957 - 10,172,781 on strand +	Gallus gallus transducer of ERBB2, 1 (TOB1), mRNA.
SPAG9 (ENSGALG00000034001)	18 : 10,076,394 - 10,134,958 on strand +	sperm associated antigen 9
NME1 (ENSGALG00000007305)	18 : 10,070,304 - 10,073,843 on strand -	Gallus gallus NME/NM23 nucleoside diphosphate kinase 1 (NME1), mRNA.
PYCR2 (ENSGALG00000007300)	18 : 10,063,081 - 10,067,399 on strand -	pyrroline-5-carboxylate reductase 2
MAFG (ENSGALG00000031475)	18 : 10,057,903 - 10,059,605 on strand -	Gallus gallus v-maf avian musculoaponeurotic fibrosarcoma oncogene homolog G (MAFG), mRNA
SIRT7 (ENSGALG00000007286)	18 : 10,050,270 - 10,054,987 on strand -	Gallus gallus sirtuin 7 (SIRT7), mRNA.
ENSGALG00000023308	18 : 10,036,813 - 10,037,151 on strand +
PCYT2 (ENSGALG00000007251)	18 : 10,036,407 - 10,052,209 on strand -	phosphate cytidylyltransferase 2, ethanolamine
ALYREF (ENSGALG00000007237)	18 : 10,031,892 - 10,036,686 on strand -	Gallus gallus Aly/REF export factor (ALYREF), mRNA
ARHGDIA (ENSGALG00000008443)	18 : 10,022,900 - 10,031,707 on strand -	Gallus gallus Rho GDP dissociation inhibitor (GDI) alpha (ARHGDIA), mRNA.
P4HB (ENSGALG00000038290)	18 : 10,008,355 - 10,018,970 on strand -	protein disulfide-isomerase precursor
PPP1R27 (ENSGALG00000035913)	18 : 10,006,827 - 10,008,386 on strand -	protein phosphatase 1 regulatory subunit 27
FAM195B (ENSGALG00000042814)	18 : 10,003,776 - 10,006,571 on strand -	Gallus gallus family with sequence similarity 195, member B (FAM195B), transcript variant 2, mRNA.
GCGR (ENSGALG00000011219)	18 : 9,997,747 - 10,000,701 on strand +	Gallus gallus glucagon receptor (GCGR), mRNA. [
ENSGALG00000032336	18 : 9,986,240 - 9,991,627 on strand +
HGS (ENSGALG00000007224)	18 : 9,972,756 - 9,981,924 on strand +	hepatocyte growth factor-regulated tyrosine kinase substrate
ENSGALG00000038671	18 : 9,966,701 - 9,967,708 on strand +	Gallus gallus uncharacterized LOC422090
TMC6 (ENSGALG00000038875)	18 : 9,959,993 - 9,965,098 on strand +	transmembrane channel like 6
SYNGR2 (ENSGALG00000027902)	18 : 9,956,848 - 9,959,064 on strand -	synaptogyrin 2
TK1 (ENSGALG00000007191)	18 : 9,953,831 - 9,956,590 on strand +	Thymidine kinase, cytosolic
AFMID (ENSGALG00000000109)	18 : 9,950,627 - 9,953,475 on strand -	arylformamidase
ENSGALG00000027822	18 : 9,946,783 - 9,949,248 on strand +
SOCS3 (ENSGALG00000027786)	18 : 9,931,036 - 9,933,067 on strand +	Gallus gallus suppressor of cytokine signaling 3 (SOCS3), mRNA.
PGS1 (ENSGALG00000007181)	18 : 9,912,347 - 9,929,719 on strand -	Gallus gallus phosphatidylglycerophosphate synthase 1 (PGS1), mRNA
ENSGALG00000029962	18 : 9,891,944 - 9,894,665 on strand +
CYTH1 (ENSGALG00000007093)	18 : 9,870,936 - 9,887,583 on strand +	Gallus gallus cytohesin 1 (CYTH1), mRNA
Turkey
	on strand - = ->
	on strand + = <-
SLC16A3 (ENSMGAG00000005559)	20 : 4,873,972 - 4,877,761 on strand -	solute carrier family 16 member 3
FASN (ENSMGAG00000005000)	20 : 4,922,842 - 4,951,483 on strand +	fatty acid synthase
DUS1L (ENSMGAG00000005146)	20 : 4,955,181 - 4,965,510 on strand +	dihydrouridine synthase 1 like
GPS1 (ENSMGAG00000005163)	20 : 4,970,738 - 4,980,160 on strand -	G protein pathway suppressor 1
RFNG (ENSMGAG00000005207)	20 : 4,991,064 - 4,998,434 on strand +	RFNG O-fucosylpeptide 3-beta-N-acetylglucosaminyltransferase
DCXR (ENSMGAG00000005237)	20 : 5,000,257 - 5,002,805 on strand +	dicarbonyl and L-xylulose reductase
RAC3 (ENSMGAG00000005256)	20 : 5,003,742 - 5,005,911 on strand -	ras-related C3 botulinum toxin substrate 3 (rho family, small GTP binding protein Rac3)
LRRC45 (ENSMGAG00000005276)	20 : 5,008,580 - 5,017,787 on strand -	leucine rich repeat containing 45
ASPSCR1 (ENSMGAG00000005293)	20 : 5,022,944 - 5,058,107 on strand -	ASPSCR1, UBX domain containing tether for SLC2A4
NOTUM (ENSMGAG00000005309)	20 : 5,064,871 - 5,070,099 on strand +	NOTUM, palmitoleoyl-protein carboxylesterase
MYADML2 (ENSMGAG00000015417)	20 : 5,073,573 - 5,074,484 on strand +	myeloid associated differentiation marker like 2
ENSMGAG00000005323	20 : 5,078,221 - 5,079,934 on strand +	Uncharacterized protein
MAFG (ENSMGAG00000005329)	20 : 5,085,193 - 5,085,760 on strand +	MAF bZIP transcription factor G
PCYT2 (ENSMGAG00000005333)	20 : 5,091,974 - 5,105,992 on strand +	phosphate cytidylyltransferase 2, ethanolamine
ARHGDIA (ENSMGAG00000005399)	20 : 5,119,410 - 5,123,274 on strand +	Rho GDP dissociation inhibitor alpha
P4HB (ENSMGAG00000005412)	20 : 5,127,498 - 5,134,741 on strand +	prolyl 4-hydroxylase subunit beta
PPP1R27 (ENSMGAG00000005431)	20 : 5,136,971 - 5,139,610 on strand +	protein phosphatase 1 regulatory subunit 27
GCGR (ENSMGAG00000005435)	20 : 5,144,415 - 5,147,344 on strand -	glucagon receptor [
HGS (ENSMGAG00000005652)	20 : 5,154,908 - 5,163,370 on strand -	hepatocyte growth factor-regulated tyrosine kinase substrate
ARL16 (ENSMGAG00000005714)	20 : 5,163,471 - 5,164,350 on strand +	ADP ribosylation factor like GTPase 16
TMC6 (ENSMGAG00000005728)	20 : 5,170,960 - 5,176,073 on strand -	transmembrane channel like 6
TK1 (ENSMGAG00000005771)	20 : 5,196,383 - 5,227,846 on strand -	thymidine kinase 1
AFMID (ENSMGAG00000005781)	20 : 5,197,789 - 5,200,835 on strand +	arylformamidase
ENSMGAG00000005812	20 : 5,201,821 - 5,202,958 on strand -	Uncharacterized protein
PGS1 (ENSMGAG00000005827)	20 : 5,226,704 - 5,237,800 on strand +	phosphatidylglycerophosphate synthase 1
ENSMGAG00000005863	20 : 5,238,625 - 5,269,108 on strand -
ENPP7 (ENSMGAG00000005584)	20 : 5,272,040 - 5,275,236 on strand -	ectonucleotide pyrophosphatase/phosphodiesterase 7
RBFOX3 (ENSMGAG00000005600)	20 : 5,364,522 - 5,369,351 on strand +	RNA binding protein, fox-1 homolog 3
CYTH1 (ENSMGAG00000005976)	20 : 5,369,190 - 5,379,254 on strand -	cytohesin 1
USP36 (ENSMGAG00000005989)	20 : 5,383,009 - 5,398,038 on strand -	ubiquitin specific peptidase 36
TIMP2 (ENSMGAG00000016777)	20 : 5,405,470 - 5,406,301 on strand -	TIMP metallopeptidase inhibitor 2
Chinese turtle
	on strand - = ->
	on strand + = <-
DCXR (ENSPSIG00000012771)	JH207528.1 : 22 - 6,809 on strand +	dicarbonyl and L-xylulose reductase
RAC3 (ENSPSIG00000013271)	JH207528.1 : 7,759 - 13,650 on strand -	ras-related C3 botulinum toxin substrate 3 (rho family, small GTP binding protein Rac3) [
LRRC45 (ENSPSIG00000013415)	JH207528.1 : 21,616 - 41,672 on strand -	leucine rich repeat containing 45
STRA13 (ENSACAG00000029104)	JH207528.1 : 46,858 - 56,315 on strand +	stimulated by retinoic acid 13
ASPSCR1 (ENSPSIG00000014415)	JH207528.1 : 59,130 - 183,902 on strand -	ASPSCR1, UBX domain containing tether for SLC2A4
NOTUM (ENSPSIG00000015016)	JH207528.1 : 183,212 - 197,321 on strand +	NOTUM, palmitoleoyl-protein carboxylesterase
MYADML2 (ENSPSIG00000000650)	JH207528.1 : 201,685 - 202,602 on strand +	myeloid associated differentiation marker like 2
ENSPSIG00000015420	JH207528.1 : 230,841 - 235,789 on strand +
MAFG (ENSPSIG00000015955)	JH207528.1 : 255,199 - 255,767 on strand +	MAF bZIP transcription factor G
ENSPSIG00000016168	JH207528.1 : 274,840 - 279,075 on strand +
PCYT2 (ENSPSIG00000016328)	JH207528.1 : 301,499 - 316,855 on strand +	phosphate cytidylyltransferase 2, ethanolamine
ENSPSIG00000017538	JH207528.1 : 355,789 - 359,409 on strand -
ENSPSIG00000017541	JH207528.1 : 367,726 - 368,451 on strand +
ARHGDIA (ENSPSIG00000017574)	JH207528.1 : 387,666 - 391,604 on strand +	Rho GDP dissociation inhibitor alpha
P4HB (ENSPSIG00000017694)	JH207528.1 : 411,347 - 422,067 on strand +	prolyl 4-hydroxylase subunit beta
MCRIP1 (ENSPSIG00000017780)	JH207528.1 : 432,330 - 435,954 on strand +	MAPK regulated corepressor interacting protein 1
Lizard
	on strand - = ->
	on strand + = <-
ENSACAG00000010142	2 : 118,187,473 - 118,188,219 on strand -
DCXR (ENSACAG00000010147)	2 : 118,191,017 - 118,196,883 on strand +	dicarbonyl and L-xylulose reductase
RAC3 (ENSACAG00000010192)	2 : 118,197,926 - 118,205,548 on strand -	ras-related C3 botulinum toxin substrate 3 (rho family, small GTP binding protein Rac3)
LRRC45 (ENSACAG00000010215)	2 : 118,218,950 - 118,240,942 on strand -	leucine rich repeat containing 45 [
STRA13 (ENSACAG00000029104)	2 : 118,243,857 - 118,255,004 on strand +	stimulated by retinoic acid 13
ASPSCR1 (ENSACAG00000010247)	2 : 118,261,684 - 118,357,322 on strand -	ASPSCR1, UBX domain containing tether for SLC2A4
NOTUM (ENSACAG00000010278)	2 : 118,377,462 - 118,400,345 on strand +	NOTUM, palmitoleoyl-protein carboxylesterase
MYADML2 (ENSACAG00000010270)	2 : 118,406,271 - 118,407,209 on strand +	myeloid associated differentiation marker like 2
ENSACAG00000010316	2 : 118,425,525 - 118,442,804 on strand +
MAFG (ENSACAG00000010413)	2 : 118,464,020 - 118,464,706 on strand +	MAF bZIP transcription factor G
SIRT7 (ENSACAG00000010434)	2 : 118,482,249 - 118,490,171 on strand +	sirtuin 7
PCYT2 (ENSACAG00000010492)	2 : 118,494,947 - 118,520,398 on strand +	phosphate cytidylyltransferase 2, ethanolamine
ENSACAG00000022358	2 : 118,553,556 - 118,553,693 on strand -
ALYREF (ENSACAG00000010526)	2 : 118,563,537 - 118,566,808 on strand +	Aly/REF export factor
ARHGDIA (ENSACAG00000010539)	2 : 118,584,879 - 118,588,892 on strand +	Rho GDP dissociation inhibitor alpha
P4HB (ENSACAG00000010570)	2 : 118,615,571 - 118,636,374 on strand +	prolyl 4-hydroxylase subunit beta
PPP1R27 (ENSACAG00000010634)	2 : 118,655,076 - 118,659,001 on strand +	protein phosphatase 1 regulatory subunit 27
MCRIP1 (ENSACAG00000010637)	2 : 118,662,186 - 118,667,480 on strand +	MAPK regulated corepressor interacting protein 1
GCGR (ENSACAG00000010639)	2 : 118,685,374 - 118,730,383 on strand -	glucagon receptor
ENSACAG00000010699	2 : 118,718,177 - 118,719,168 on strand +
ENSACAG00000010703	2 : 118,760,589 - 118,776,177 on strand -
MRPL12 (ENSACAG00000010743)	2 : 118,783,577 - 118,791,167 on strand -	mitochondrial ribosomal protein L12
DDX39A (ENSACAG00000010756)	2 : 118,795,205 - 118,817,357 on strand +	DEAD-box helicase 39
ADGRE5 (ENSACAG00000010832)	2 : 118,814,120 - 118,876,266 on strand -	adhesion G protein-coupled receptor E5
ADGRL1 (ENSACAG00000010837)	2 : 118,927,379 - 119,032,461 on strand -	adhesion G protein-coupled receptor L1
ASF1B (ENSACAG00000012254)	2 : 119,356,430 - 119,367,140 on strand +	anti-silencing function 1B histone chaperone
PRKACA (ENSACAG00000012230)	2 : 119,457,730 - 119,468,670 on strand +	protein kinase cAMP-activated catalytic subunit alpha
ENSACAG00000009881	2 : 119,496,000 - 119,498,199 on strand +
ENSACAG00000022129	2 : 119,507,061 - 119,507,342 on strand -
ENSACAG00000009885	2 : 119,533,237 - 119,545,610 on strand -
LRRC8E (ENSACAG00000009928)	2 : 119,588,508 - 119,599,044 on strand +	leucine rich repeat containing 8 family member E
Frog
	on strand - = ->
	on strand + = <-
myadml2 (ENSXETG00000005379)	GL172918.1 : 1,482,106 - 1,483,026 on strand -	myeloid-associated differentiation marker-like 2 [
pycr1 (ENSXETG00000005381)	GL172918.1 : 1,463,562 - 1,476,242 on strand -	pyrroline-5-carboxylate reductase family, member 1
ENSXETG00000002594	GL172918.1 : 1,456,869 - 1,457,456 on strand +
mafg (ENSXETG00000005386)	GL172918.1 : 1,448,882 - 1,449,600 on strand -	v-maf avian musculoaponeurotic fibrosarcoma oncogene homolog G
sirt7 (ENSXETG00000005388)	GL172918.1 : 1,431,246 - 1,437,816 on strand -	sirtuin 7
pcyt2 (ENSXETG00000005389)	GL172918.1 : 1,408,953 - 1,423,634 on strand -	phosphate cytidylyltransferase 2, ethanolamine
NPB (ENSXETG00000033774)	GL172918.1 : 1,388,922 - 1,390,463 on strand +	neuropeptide B
alyref (ENSXETG00000005391)	GL172918.1 : 1,368,611 - 1,374,724 on strand -	Aly/REF export factor
ENSXETG00000033135	GL172918.1 : 1,364,863 - 1,366,325 on strand -
arhgdia (ENSXETG00000025477)	GL172918.1 : 1,354,105 - 1,361,500 on strand -	Rho GDP dissociation inhibitor (GDI) alpha
ENSXETG00000030289	GL172918.1 : 1,332,098 - 1,333,456 on strand -
p4hb (ENSXETG00000005405)	GL172918.1 : 1,293,250 - 1,303,208 on strand -	prolyl 4-hydroxylase, beta polypeptide
ppp1r27	GL172918.1 : 1,275,311 - 1,291,416 on strand -	protein phosphatase 1, regulatory subunit 27
fam195b (ENSXETG00000005420)	GL172918.1 : 1,250,340 - 1,264,373 on strand -	family with sequence similarity 195, member B
gcgr (ENSXETG00000005421)	GL172918.1 : 1,174,540 - 1,186,944 on strand +	glucagon receptor
slc25a10 (ENSXETG00000019705)	GL172918.1 : 1,091,484 - 1,115,960 on strand +	solute carrier family 25 (mitochondrial carrier; dicarboxylate transporter), member 10
hgs (ENSXETG00000019701)	GL172918.1 : 1,070,978 - 1,087,565 on strand +	ADP-ribosylation factor-like 16
arl16 (ENSXETG00000025485)	GL172918.1 : 1,060,555 - 1,070,788 on strand -
slc16a3 (ENSXETG00000019700)	GL172918.1 : 1,036,040 - 1,050,599 on strand +	solute carrier family 16 (monocarboxylate transporter), member 3
fasn (ENSXETG00000019666)	GL172918.1 : 892,576 - 919,755 on strand -	fatty acid synthase
dus1l (ENSXETG00000019654)	GL172918.1 : 868,634 - 885,364 on strand -	dihydrouridine synthase 1-like
gps1 (ENSXETG00000019653)	GL172918.1 : 853,065 - 865,859 on strand +	G protein pathway suppressor 1
rfng (ENSXETG00000019657)	GL172918.1 : 843,591 - 851,203 on strand -	RFNG O-fucosylpeptide 3-beta-N-acetylglucosaminyltransferase
card14 (ENSXETG00000019652)	GL172918.1 : 787,724 - 812,304 on strand -	caspase recruitment domain family, member 14
sgsh (ENSXETG00000019651)	GL172918.1 : 769,291 - 779,481 on strand +	N-sulfoglucosamine sulfohydrolase
slc26a11 (ENSXETG00000019624)	GL172918.1 : 750,758 - 764,460 on strand -	solute carrier family 26 (anion exchanger), member 11
lig3 (ENSXETG00000019634)	GL172918.1 : 721,040 - 735,913 on strand -	ligase III, DNA, ATP-dependent
Coelacanth
	on strand - = ->
	on strand + = <-
DUS1L (ENSLACG00000011348)	JH126596.1 : 593,043 - 642,531 on strand +	dihydrouridine synthase 1 like
LRRC45 (ENSLACG00000011122)	JH126596.1 : 569,738 - 590,601 on strand +	leucine rich repeat containing 45
CXorf57 (ENSLACG00000010847)	JH126596.1 : 540,292 - 559,794 on strand +	chromosome X open reading frame 57
NOTUM (ENSLACG00000010522)	JH126596.1 : 511,622 - 535,128 on strand +	NOTUM, palmitoleoyl-protein carboxylesterase
ASPSCR1 (ENSLACG00000009319)	JH126596.1 : 411,517 - 492,920 on strand -	ASPSCR1, UBX domain containing tether for SLC2A4
STRA13 (ENSLACG00000022125)	JH126596.1 : 400,730 - 407,683 on strand +	stimulated by retinoic acid 13
SIRT7 (ENSLACG00000008982)	JH126596.1 : 385,279 - 400,266 on strand -	sirtuin 7
pycr1a (ENSLACG00000008611)	JH126596.1 : 357,081 - 375,952 on strand -	pyrroline-5-carboxylate reductase 1a
ENSLACG00000008166	JH126596.1 : 324,547 - 354,617 on strand -
PCYT2 (ENSLACG00000007326)	JH126596.1 : 269,603 - 296,802 on strand -	phosphate cytidylyltransferase 2, ethanolamine
gnav1 (ENSLACG00000006337)	JH126596.1 : 213,074 - 267,515 on strand -	guanine nucleotide binding protein (G protein) alpha v1
NPB (ENSLACG00000006178)	JH126596.1 : 204,856 - 207,139 on strand +	neuropeptide B
ALYREF (ENSLACG00000005694)	JH126596.1 : 180,319 - 194,653 on strand -	Aly/REF export factor
ARHGDIA (ENSLACG00000005116)	JH126596.1 : 152,499 - 175,252 on strand -	Rho GDP dissociation inhibitor alpha
anapc11 (ENSLACG00000004812)	JH126596.1 : 139,873 - 149,792 on strand -	APC11 anaphase promoting complex subunit 11 homolog (yeast)
P4HB (ENSLACG00000003663)	JH126596.1 : 90,753 - 126,432 on strand -	prolyl 4-hydroxylase subunit beta
PPP1R27 (ENSLACG00000003211)	JH126596.1 : 74,350 - 85,376 on strand -	protein phosphatase 1 regulatory subunit 27
si:dkey-40g16.6 (1 of many) (ENSLACG00000002264)	JH126596.1 : 44,811 - 70,448 on strand +
Tetraodon
	on strand - = ->
	on strand + = <-
ENSTNIG00000014123	18 : 1,717,483 - 1,718,269 on strand -
si:ch211-239f4.1 (ENSTNIG00000014124)	18 : 1,703,225 - 1,709,022 on strand +	ecotropic viral integration site 5 like
ENSTNIG00000014122	18 : 1,701,631 - 1,720,790 on strand -
BPTF (1 of many) (ENSTNIG00000014125)	18 : 1,672,831 - 1,693,458 on strand +	bromodomain PHD finger transcription factor
nol11 (ENSTNIG00000014126)	18 : 1,665,095 - 1,670,728 on strand +	nucleolar protein 11
APOH (ENSTNIG00000014127)	18 : 1,659,951 - 1,664,708 on strand +	apolipoprotein H
ENSTNIG00000014128	18 : 1,657,612 - 1,657,782 on strand -	Uncharacterized protein
ENSTNIG00000014129	18 : 1,609,604 - 1,620,564 on strand -
cacng5a (ENSTNIG00000014130)	18 : 1,588,641 - 1,602,109 on strand -	calcium channel, voltage-dependent, gamma subunit 5a
helz (ENSTNIG00000014131)	18 : 1,544,469 - 1,567,124 on strand +	helicase with zinc finger
PITPNC1 (1 of many) (ENSTNIG00000014132)	18 : 1,511,330 - 1,516,572 on strand -	phosphatidylinositol transfer protein, cytoplasmic 1
ENSTNIG00000014133	18 : 1,496,443 - 1,498,753 on strand -
ftr99 (ENSTNIG00000014134)	18 : 1,493,524 - 1,495,676 on strand +	finTRIM family, member 99
arhgdia (1 of many) (ENSTNIG00000014135)	18 : 1,487,190 - 1,491,518 on strand +	Rho GDP dissociation inhibitor (GDI) alpha
ENSTNIG00000014136	18 : 1,484,732 - 1,486,535 on strand
p4hb (ENSTNIG00000014137)	18 : 1,477,559 - 1,483,124 on strand -	prolyl 4-hydroxylase, beta polypeptide
ppp1r27b (ENSTNIG00000014138)	18 : 1,474,581 - 1,475,717 on strand -	protein phosphatase 1, regulatory subunit 27b
anapc11 (ENSTNIG00000014139)	18 : 1,473,715 - 1,474,403 on strand +	APC11 anaphase promoting complex subunit 11 homolog (yeast)
pla2g12b (ENSTNIG00000014140)	18 : 1,470,814 - 1,472,343 on strand -	phospholipase A2, group XIIB
scrn2 (ENSTNIG00000014141)	18 : 1,459,733 - 1,463,446 on strand +	secernin 2
zgc:77358 (ENSTNIG00000014142)	18 : 1,449,841 - 1,450,721 on strand -	Sp6 transcription factor
cwc25 (ENSTNIG00000014143)	18 : 1,445,320 - 1,447,681 on strand -	CWC25 spliceosome-associated protein homolog (S. cerevisiae)
psmb3 (ENSTNIG00000014144)	18 : 1,442,656 - 1,443,640 on strand	proteasome subunit beta 3
PIP4K2B (ENSTNIG00000014145)	18 : 1,437,504 - 1,441,506 on strand +	phosphatidylinositol-5-phosphate 4-kinase type 2 beta
PCGF2 (ENSTNIG00000014146)	18 : 1,432,816 - 1,435,669 on strand -	polycomb group ring finger 2
MLLT6 (ENSTNIG00000014147)	18 : 1,416,235 - 1,426,487 on strand +	MLLT6, PHD finger domain containing
IKZF3 (ENSTNIG00000014148)	18 : 1,411,150 - 1,414,723 on strand +	IKAROS family zinc finger 3
IGFBP4 (ENSTNIG00000014149)	18 : 1,397,305 - 1,405,064 on strand -	insulin like growth factor binding protein 4
SMARCE1 (1 of many) (ENSTNIG00000014150)	18 : 1,390,391 - 1,393,658 on strand -	SWI/SNF related, matrix associated, actin dependent regulator of chromatin, subfamily e, member 1
ENSTNIG0000001415	18 : 1,380,839 - 1,388,120 on strand -
ENSTNIG00000014152	18 : 1,373,473 - 1,378,642 on strand +
Fugu
	on strand - = ->
	on strand + = <-
ENSTRUG00000001840	scaffold_244 : 5,981 - 12,446 on strand -
ENSTRUG00000001894	scaffold_244 : 14,698 - 15,469 on strand +
ftr99 (ENSTRUG00000001904)	scaffold_244 : 15,664 - 18,391 on strand -	finTRIM family, member 99
arhgdia (1 of many) (ENSTRUG00000002555)	scaffold_244 : 22,539 - 26,565 on strand -	Rho GDP dissociation inhibitor (GDI) alpha
ENSTRUG00000003051	scaffold_244 : 28,043 - 29,972 on strand -
p4hb (ENSTRUG00000003279)	scaffold_244 : 31,623 - 38,707 on strand +	prolyl 4-hydroxylase, beta polypeptide
ppp1r27b (ENSTRUG00000004244)	scaffold_244 : 40,794 - 41,540 on strand +	protein phosphatase 1, regulatory subunit 27b
anapc11 (ENSTRUG00000004285)	scaffold_244 : 42,250 - 42,917 on strand -	APC11 anaphase promoting complex subunit 11 homolog (yeast)
pla2g12b (ENSTRUG00000004301)	scaffold_244 : 44,425 - 46,093 on strand +	phospholipase A2, group XIIB
scrn2 (ENSTRUG00000004440)	scaffold_244 : 54,297 - 59,974 on strand -	secernin 2
ENSTRUG00000004645	scaffold_244 : 69,921 - 70,373 on strand +
cwc25 (ENSTRUG00000004650)	scaffold_244 : 73,714 - 76,504 on strand +	CWC25 spliceosome-associated protein homolog (S. cerevisiae)
psmb3 (ENSTRUG00000004911)	scaffold_244 : 77,314 - 79,189 on strand +	proteasome subunit beta 3
PIP4K2B (ENSTRUG00000005059)	scaffold_244 : 80,467 - 83,485 on strand -	phosphatidylinositol-5-phosphate 4-kinase type 2 beta
PCGF2 (ENSTRUG00000005461)	scaffold_244 : 86,897 - 90,737 on strand +	polycomb group ring finger 2
MLLT6 (ENSTRUG00000005677)	scaffold_244 : 97,239 - 108,161 on strand -	MLLT6, PHD finger domain containing
IKZF3 (ENSTRUG00000005964)	scaffold_244 : 110,579 - 114,620 on strand -	IKAROS family zinc finger 3
IGFBP4 (ENSTRUG00000006441)	scaffold_244 : 120,104 - 128,650 on strand +	insulin like growth factor binding protein 4
SMARCE1 (1 of many) (ENSTRUG00000006702)	scaffold_244 : 132,427 - 136,363 on strand +	SWI/SNF related, matrix associated, actin dependent regulator of chromatin, subfamily e, member 1
ENSTRUG00000006891	scaffold_244 : 136,830 - 146,037 on strand +
ENSTRUG00000006989	scaffold_244 : 147,687 - 153,118 on strand -
Platyfish
	on strand - = ->
	on strand + = <-
tex2 (1 of many) (ENSXMAG00000017886)	JH556748.1 : 882,715 - 903,386 on strand +	testis expressed 2
ccdc40 (ENSXMAG00000017901)	JH556748.1 : 905,944 - 917,543 on strand +	coiled-coil domain containing 40
card14 (ENSXMAG00000017909)	JH556748.1 : 920,614 - 934,787 on strand +	caspase recruitment domain family, member 14
CBX4 (1 of many) (ENSXMAG00000017912)	JH556748.1 : 1,020,759 - 1,026,759 on strand +	chromobox 4
cbx8b (ENSXMAG00000017917)	JH556748.1 : 1,033,840 - 1,041,639 on strand +	chromobox homolog 8b
si:dkey-31g6.6 (ENSXMAG00000017921)	JH556748.1 : 1,038,532 - 1,042,138 on strand -	si:dkey-31g6.6 [Source:ZFIN;Acc:ZDB-GENE-110209-1]
dgke (ENSXMAG00000017923)	JH556748.1 : 1,044,076 - 1,053,497 on strand +	diacylglycerol kinase, epsilon
ENSXMAG00000017926	JH556748.1 : 1,050,241 - 1,061,663 on strand -
trim25 (ENSXMAG00000017928)	JH556748.1 : 1,068,735 - 1,074,516 on strand -	tripartite motif containing 25
rasal3 (ENSXMAG00000017931)	JH556748.1 : 1,077,307 - 1,090,944 on strand -	RAS protein activator like 3
SEC14L1 (1 of many) (ENSXMAG00000017937)	JH556748.1 : 1,094,254 - 1,121,688 on strand -	SEC14 like lipid binding 1
ENDOV (ENSXMAG00000017948)	JH556748.1 : 1,124,367 - 1,135,764 on strand +	endonuclease V
NPTX1 (1 of many) (ENSXMAG00000017951)	JH556748.1 : 1,190,928 - 1,196,843 on strand -	neuronal pentraxin 1
rptor (ENSXMAG00000017957)	JH556748.1 : 1,214,634 - 1,353,406 on strand +	regulatory associated protein of MTOR, complex 1
ENSXMAG00000017986	JH556748.1 : 1,356,688 - 1,368,836 on strand +
p4hb (ENSXMAG00000017988)	JH556748.1 : 1,381,682 - 1,393,778 on strand +	prolyl 4-hydroxylase, beta polypeptide
ppp1r27b (ENSXMAG00000018013)	JH556748.1 : 1,395,517 - 1,397,179 on strand +	protein phosphatase 1, regulatory subunit 27b
pla2g12b (ENSXMAG00000018014)	JH556748.1 : 1,405,778 - 1,409,373 on strand +	phospholipase A2, group XIIB
anapc11 (ENSXMAG00000018021)	JH556748.1 : 1,427,089 - 1,430,011 on strand +	APC11 anaphase promoting complex subunit 11 homolog (yeast)
zmp:0000001082 (ENSXMAG00000018022)	JH556748.1 : 1,431,017 - 1,448,598 on strand -	zmp:0000001082
QPRT (ENSXMAG00000018052)	JH556748.1 : 1,449,725 - 1,457,396 on strand -	quinolinate phosphoribosyltransferase
ppp1r12c (ENSXMAG00000018058)	JH556748.1 : 1,459,333 - 1,477,755 on strand +	protein phosphatase 1, regulatory subunit 12C
arhgdia (1 of many) (ENSXMAG00000018079)	JH556748.1 : 1,477,912 - 1,497,986 on strand -	Rho GDP dissociation inhibitor (GDI) alpha
ENSXMAG00000018086	JH556748.1 : 1,498,249 - 1,501,705 on strand -
scrn2 (ENSXMAG00000018095)	JH556748.1 : 1,501,852 - 1,511,634 on strand -	secernin 2
zgc:77358 (ENSXMAG00000018112)	JH556748.1 : 1,534,171 - 1,535,133 on strand +	Sp6 transcription factor
cwc25 (ENSXMAG00000018113)	JH556748.1 : 1,540,106 - 1,544,065 on strand +	CWC25 spliceosome-associated protein homolog (S. cerevisiae)
psmb3 (ENSXMAG00000018120)	JH556748.1 : 1,544,485 - 1,549,418 on strand +	proteasome subunit beta 3
PIP4K2B (ENSXMAG00000018124)	JH556748.1 : 1,549,768 - 1,563,787 on strand -	phosphatidylinositol-5-phosphate 4-kinase type 2 beta
PCGF2 (ENSXMAG00000018149)	JH556748.1 : 1,570,206 - 1,577,469 on strand +	polycomb group ring finger 2
CISD3 (1 of many) (ENSXMAG00000018154)	JH556748.1 : 1,579,537 - 1,579,881 on strand -	CDGSH iron sulfur domain 3
Medaka
	on strand - = ->
	on strand + = <-
ENSORLG00000001891	1 : 4,406,032 - 4,406,391 on strand +
card14 (ENSORLG00000001884)	1 : 4,399,733 - 4,416,154 on strand -	caspase recruitment domain family, member 14
CBX4 (1 of many) (ENSORLG00000001865)	1 : 4,282,908 - 4,286,536 on strand -	chromobox 4
cbx8b (ENSORLG00000001853)	1 : 4,276,485 - 4,278,120 on strand -	chromobox homolog 8b
si:dkey-31g6.6 (ENSORLG00000001844)	1 : 4,271,784 - 4,275,443 on strand +	si:dkey-31g6.6
dgke (ENSORLG00000001839)	1 : 4,263,448 - 4,269,835 on strand -	diacylglycerol kinase, epsilon
ENSORLG00000001829	1 : 4,252,916 - 4,258,487 on strand +
ENSORLG00000001826	1 : 4,249,206 - 4,252,631 on strand +
trim25 (ENSORLG00000001822)	1 : 4,238,924 - 4,246,625 on strand +	tripartite motif containing 25
rasal3 (ENSORLG00000001820)	1 : 4,224,504 - 4,232,326 on strand +	RAS protein activator like 3
SEC14L1 (1 of many) (ENSORLG00000001808)	1 : 4,196,025 - 4,216,488 on strand -	SEC14 like lipid binding 1
ENDOV (ENSORLG00000001763)	1 : 4,154,947 - 4,193,170 on strand -	endonuclease V
NPTX1 (1 of many) (ENSORLG00000001756)	1 : 4,084,529 - 4,087,303 on strand +	neuronal pentraxin 1
rptor (ENSORLG00000001734)	1 : 3,882,243 - 3,993,708 on strand -	regulatory associated protein of MTOR, complex 1
ENSORLG00000001707	1 : 3,856,205 - 3,877,026 on strand -
p4hb (ENSORLG00000001698)	1 : 3,834,605 - 3,846,832 on strand -	prolyl 4-hydroxylase, beta polypeptide
ppp1r27b (ENSORLG00000001675)	1 : 3,830,650 - 3,831,740 on strand -	protein phosphatase 1, regulatory subunit 27b
anapc11 (ENSORLG00000001673)	1 : 3,827,663 - 3,830,237 on strand +	APC11 anaphase promoting complex subunit 11 homolog (yeast)
ENSORLG00000001670	1 : 3,818,401 - 3,819,365 on strand -
ENSORLG00000001668	1 : 3,808,985 - 3,811,954 on strand -
pla2g12b (ENSORLG00000001665)	1 : 3,804,857 - 3,808,118 on strand +	phospholipase A2, group XIIB
ENSORLG00000001655	1 : 3,798,104 - 3,799,293 on strand -
zmp:0000001082 (ENSORLG00000001648)	1 : 3,777,198 - 3,793,420 on strand +	zmp:0000001082
ENSORLG00000001635	1 : 3,765,894 - 3,770,869 on strand +
ENSORLG00000001632	1 : 3,749,606 - 3,752,025 on strand +
arhgdia (1 of many) (ENSORLG00000001629)	1 : 3,678,205 - 3,686,320 on strand +	Rho GDP dissociation inhibitor (GDI) alpha
ENSORLG00000001620	1 : 3,673,251 - 3,676,669 on strand +
USP34 (ENSORLG00000001605)	1 : 3,351,241 - 3,387,682 on strand +	ubiquitin specific peptidase 34
XPO1 (1 of many) (ENSORLG00000001559)	1 : 3,321,598 - 3,338,464 on strand +	exportin 1
fam161a (ENSORLG00000001528)	1 : 3,311,540 - 3,318,564 on strand +	family with sequence similarity 161, member A [
cct4 (ENSORLG00000001511)	1 : 3,303,006 - 3,310,870 on strand +	chaperonin containing TCP1, subunit 4 (delta)
Zebrafish
	on strand - = ->
	on strand + = <-
rhot1b (ENSDARG00000103313)	6 : 22,098,096 - 22,123,784 on strand +	ras homolog family member T1
tefm (ENSDARG00000100548)	6 : 22,083,498 - 22,088,879 on strand -	transcription elongation factor, mitochondrial
atad5b (ENSDARG00000101126)	6 : 22,073,459 - 22,095,006 on strand +	ATPase family, AAA domain containing 5b
suz12b (ENSDARG00000098924)	6 : 22,060,611 - 22,073,224 on strand +	SUZ12 polycomb repressive complex 2b subunit
utp6 (ENSDARG00000098433)	6 : 22,053,123 - 22,060,439 on strand -	UTP6, small subunit (SSU) processome component, homolog (yeast) [
si:dkey-10p5.10 (ENSDARG00000099307)	6 : 22,049,538 - 22,052,625 on strand +	si:dkey-10p5.10
si:dkey-31g6.4 (ENSDARG00000102218)	6 : 21,970,010 - 21,971,384 on strand +	si:dkey-31g6.4
rab11fip4b (ENSDARG00000103207)	6 : 21,947,330 - 21,968,869 on strand +	RAB11 family interacting protein 4 (class II) b
trim25 (ENSDARG00000104396)	6 : 21,917,006 - 21,929,302 on strand -	tripartite motif containing 25
dgke (ENSDARG00000104793)	6 : 21,896,067 - 21,910,379 on strand +	diacylglycerol kinase, epsilon
si:dkey-31g6.6 (ENSDARG00000101393)	6 : 21,892,727 - 21,895,018 on strand -	si:dkey-31g6.6
cbx8b (ENSDARG00000098771)	6 : 21,887,985 - 21,891,310 on strand +	chromobox homolog 8b
card14 (ENSDARG00000103485)	6 : 21,827,123 - 21,876,157 on strand +	caspase recruitment domain family, member 14
ccdc40 (ENSDARG00000100584)	6 : 21,779,819 - 21,821,089 on strand +	coiled-coil domain containing 40
anapc11 (ENSDARG00000102531)	6 : 21,773,751 - 21,779,536 on strand -	APC11 anaphase promoting complex subunit 11 homolog (yeast)
p4hb (ENSDARG00000105116)	6 : 21,732,143 - 21,757,077 on strand -	prolyl 4-hydroxylase, beta polypeptide
ppp1r27b (ENSDARG00000100504)	6 : 21,725,640 - 21,727,741 on strand -	protein phosphatase 1, regulatory subunit 27b
si:dkey-237i9.8 (ENSDARG00000103020)	6 : 21,671,396 - 21,723,834 on strand +	si:dkey-237i9.8
si:dkey-237i9.1	6 : 21,640,317 - 21,657,400 on strand -	si:dkey-237i9.1
SEC14L1 (1 of many) (ENSDARG00000101792)	6 : 21,604,782 - 21,638,532 on strand -	SEC14 like lipid binding 1
CR381537.1 (ENSDARG00000086403)	6 : 21,565,627 - 21,567,339 on strand +
CR381537.3 (ENSDARG00000100050)	6 : 21,562,522 - 21,564,780 on strand -
pimr39 (ENSDARG00000093388)	6 : 21,481,119 - 21,483,067 on strand +	Pim proto-oncogene, serine/threonine kinase, related 39
CR381537.2 (ENSDARG00000100033)	6 : 21,478,275 - 21,480,563 on strand -
BX927341.4 (ENSDARG00000095537)	6 : 21,428,853 - 21,430,567 on strand +
pimr36 (ENSDARG00000093301)	6 : 21,425,745 - 21,428,156 on strand -	Pim proto-oncogene, serine/threonine kinase, related 36
pimr35 (ENSDARG00000104189)	6 : 21,369,111 - 21,371,076 on strand -	Pim proto-oncogene, serine/threonine kinase, related 35
BX927341.2 (ENSDARG00000088626)	6 : 21,301,228 - 21,303,300 on strand +
BX927341.3 (ENSDARG00000093226)	6 : 21,298,259 - 21,300,509 on strand -
pimr38 (ENSDARG00000103997)	6 : 21,221,427 - 21,223,388 on strand +	Pim proto-oncogene, serine/threonine kinase, related 38
pimr37 (ENSDARG00000093328)	6 : 21,211,870 - 21,213,828 on strand -	Pim proto-oncogene, serine/threonine kinase, related 37
Spooted gar
scpep1 (ENSLOCG00000013821)	LG10 : 41,679,251 - 41,689,294 on strand +	serine carboxypeptidase 1
trim25 (ENSLOCG00000013830)	LG10 : 41,689,855 - 41,695,793 on strand +	tripartite motif containing 25
ENSLOCG00000013834	LG10 : 41,702,287 - 41,706,389 on strand -
ENSLOCG00000013838	LG10 : 41,708,439 - 41,711,681 on strand +
ENSLOCG00000013839	LG10 : 41,718,274 - 41,723,551 on strand -
dgke (ENSLOCG00000013841)	LG10 : 41,726,486 - 41,734,717 on strand -	diacylglycerol kinase, epsilon
ENSLOCG00000017766	LG10 : 41,738,226 - 41,738,357 on strand +
cbx8a (ENSLOCG00000013847)	LG10 : 41,744,201 - 41,746,161 on strand -	chromobox homolog 8a (Pc class homolog, Drosophila)
ENSLOCG00000013850	LG10 : 41,763,227 - 41,767,909 on strand -
tbc1d16 (ENSLOCG00000013855)	LG10 : 41,800,053 - 41,812,054 on strand -	TBC1 domain family, member 16
card14 (ENSLOCG00000013861)	LG10 : 41,816,791 - 41,829,478 on strand -	caspase recruitment domain family, member 14
gaa (ENSLOCG00000013866)	LG10 : 41,833,262 - 41,846,113 on strand -	glucosidase, alpha; acid (Pompe disease, glycogen storage disease type II)
ccdc40 (ENSLOCG00000013876)	LG10 : 41,847,349 - 41,862,248 on strand -	coiled-coil domain containing 40
alyref (ENSLOCG00000013879)	LG10 : 41,862,273 - 41,867,439 on strand +	Aly/REF export factor
arhgdia (ENSLOCG00000013884)	LG10 : 41,876,112 - 41,879,650 on strand +	Rho GDP dissociation inhibitor (GDI) alpha
p4hb (ENSLOCG00000013887)	LG10 : 41,887,589 - 41,898,965 on strand +	prolyl 4-hydroxylase, beta polypeptide
ppp1r27a (ENSLOCG00000013900)	LG10 : 41,900,781 - 41,902,181 on strand +	protein phosphatase 1, regulatory subunit 27a
fam195b (ENSLOCG00000013906)	LG10 : 41,907,223 - 41,908,582 on strand +	family with sequence similarity 195, member B
gcgra (ENSLOCG00000013910)	LG10 : 41,972,095 - 42,019,878 on strand -	glucagon receptor a
si:ch1073-100f3.2 (ENSLOCG00000013922)	LG10 : 42,063,479 - 42,080,230 on strand -	si:ch1073-100f3.2
zgc:103625 (ENSLOCG00000013936)	LG10 : 42,080,446 - 42,084,600 on strand +	zgc:103625
hgs (ENSLOCG00000013943)	LG10 : 42,085,480 - 42,101,253 on strand -	hepatocyte growth factor-regulated tyrosine kinase substrate
arl16 (ENSLOCG00000013950)	LG10 : 42,099,534 - 42,103,870 on strand +	ADP-ribosylation factor-like 16
epn3a (ENSLOCG00000013956)	LG10 : 42,106,016 - 42,117,380 on strand -	epsin 3a
mycbpap (ENSLOCG00000013960)	LG10 : 42,126,558 - 42,147,611 on strand -	mycbp associated protein
si:dkey-27j5.5 (ENSLOCG00000013963)	LG10 : 42,149,622 - 42,151,367 on strand +	si:dkey-27j5.5
rsad1 (ENSLOCG00000013969)	LG10 : 42,154,561 - 42,161,536 on strand -	radical S-adenosyl methionine domain containing 1
si:dkey-27j5.3 (ENSLOCG00000013973)	LG10 : 42,184,772 - 42,196,008 on strand -	meteorin, glial cell differentiation regulator-like
b3gntl1 (ENSLOCG00000013977)	LG10 : 42,200,581 - 42,266,683 on strand -	UDP-GlcNAc:betaGal beta-1,3-N-acetylglucosaminyltransferase-like 1
tbcd (ENSLOCG00000013980)	LG10 : 42,270,778 - 42,325,718 on strand -	tubulin folding cofactor D
ENSLOCG00000014010	LG10 : 42,304,750 - 42,314,390 on strand +
Lamprey
	on strand - = ->
	on strand + = <-
ENSPMAG00000009295	GL485636 : 3,008 - 6,460 on strand +
Ciona Intestinalis
	on strand - = ->
	on strand + = <-
ENSCING00000011685	HT001068.1 : 63,459 - 64,956 on strand -
ENSCING00000003177	HT001068.1 : 58,784 - 62,782 on strand -
ENSCING00000003174	HT001068.1 : 54,100 - 58,443 on strand +
ENSCING00000003147	HT001068.1 : 37,751 - 53,440 on strand -
ENSCING00000003133	HT001068.1 : 27,764 - 38,149 on strand -
ENSCING00000025002	HT001068.1 : 20,810 - 26,493 on strand +
ENSCING00000003119	HT001068.1 : 9,659 - 20,364 on strand -
ENSCING00000007643	HT001068.1 : 6,450 - 9,707 on strand +
ENSCING00000019613	HT001068.1 : 2,217 - 3,467 on strand -
ENSCING00000021640	HT001068.1 : 2,026 - 3,321 on strand +
Ciona savignyi
	on strand - = ->
	on strand + = <-
ENSCSAVG00000011350	reftig_1 : 4,379,995 - 4,388,027 on strand +
ENSCSAVG00000011349	reftig_1 : 4,370,222 - 4,371,485 on strand -
ENSCSAVG00000011348	reftig_1 : 4,369,304 - 4,370,191 on strand -
ENSCSAVG00000011347	reftig_1 : 4,366,846 - 4,369,284 on strand +
ENSCSAVG00000011346	reftig_1 : 4,362,123 - 4,363,996 on strand +
ENSCSAVG00000011345	reftig_1 : 4,357,068 - 4,360,699 on strand +
ENSCSAVG00000011344	reftig_1 : 4,353,574 - 4,354,286 on strand -
ENSCSAVG00000011343	reftig_1 : 4,342,146 - 4,350,101 on strand +
ENSCSAVG00000011342	reftig_1 : 4,334,372 - 4,334,983 on strand +
ENSCSAVG00000011341	reftig_1 : 4,311,233 - 4,312,310 on strand -
ENSCSAVG00000011340	reftig_1 : 4,289,623 - 4,293,378 on strand -
ENSCSAVG00000011331	reftig_1 : 4,270,067 - 4,289,583 on strand +
ENSCSAVG00000011328	reftig_1 : 4,262,818 - 4,269,609 on strand -
ENSCSAVG00000011318	reftig_1 : 4,255,662 - 4,260,279 on strand -
ENSCSAVG00000011278	reftig_1 : 4,235,718 - 4,249,989 on strand -
ENSCSAVG00000011186	reftig_1 : 4,227,764 - 4,234,959 on strand -
ENSCSAVG00000011174	reftig_1 : 4,220,019 - 4,227,051 on strand +
ENSCSAVG00000011172	reftig_1 : 4,216,374 - 4,219,274 on strand -
ENSCSAVG00000011171	reftig_1 : 4,208,155 - 4,209,774 on strand -
ENSCSAVG00000011169	reftig_1 : 4,205,192 - 4,207,862 on strand +
ENSCSAVG00000011163	reftig_1 : 4,180,964 - 4,194,555 on strand +
ENSCSAVG00000011160	reftig_1 : 4,169,961 - 4,175,243 on strand +
ENSCSAVG00000011159	reftig_1 : 4,133,818 - 4,135,236 on strand -
ENSCSAVG00000011151	reftig_1 : 4,103,105 - 4,108,702 on strand +
ENSCSAVG00000011147	reftig_1 : 4,093,839 - 4,096,382 on strand -
ENSCSAVG00000011135	reftig_1 : 4,081,947 - 4,084,584 on strand +
ENSCSAVG00000011133	reftig_1 : 4,075,103 - 4,080,203 on strand +
ENSCSAVG00000011132	reftig_1 : 4,066,857 - 4,073,189 on strand +
ENSCSAVG00000011131	reftig_1 : 4,060,619 - 4,063,340 on strand -
ENSCSAVG00000011130	reftig_1 : 4,052,998 - 4,058,233 on strand +
ENSCSAVG00000011129	reftig_1 : 4,047,878 - 4,050,062 on strand +
C. elegans
	on strand - = ->
	on strand + = <-
dop-1 (WBGene00001052)	X : 4,411,380 - 4,416,079 on strand -	DOPamine receptor
F15A8.6 (WBGene00017478)	X : 4,430,866 - 4,434,502 on strand -	Carboxylic ester hydrolase
F15A8.1 (WBGene00017476)	X : 4,440,885 - 4,441,761 on strand +
mltn-13 (WBGene00017794)	X : 4,442,161 - 4,448,151 on strand -	MLt-TeN (mlt-10) related
F02E8.4 (WBGene00017177)	X : 4,454,128 - 4,457,304 on strand +
aps-2 (WBGene00000157)	X : 4,458,272 - 4,459,267 on strand +	AdaPtin, Small chain (clathrin associated complex)
atg-16.1 (WBGene00017178)	X : 4,459,634 - 4,462,609 on strand -	Autophagic-related protein 16.1
nmur-3 (WBGene00017176)	X : 4,466,518 - 4,469,005 on strand +	NMUR (NeuroMedin U Receptor) homolog
asb-2 (WBGene00000207)	X : 4,469,743 - 4,471,480 on strand +	ATP Synthase B homolog
ncr-1 (WBGene00003561)	X : 4,472,284 - 4,480,116 on strand -	Niemann-Pick C1 protein homolog 1
F46H6.5 (WBGene00023460)	X : 4,491,651 - 4,492,208 on strand -
dgk-2 (WBGene00000959)	X : 4,494,914 - 4,504,607 on strand -	Diacylglycerol kinase
rhi-1 (WBGene00004356)	X : 4,508,509 - 4,510,960 on strand +	Probable rho GDP-dissociation inhibitor
spr-3 (WBGene00005008)	X : 4,514,099 - 4,516,894 on strand +	Suppressor of presenilin protein 3
C07A12.7 (WBGene00015561)	X : 4,517,743 - 4,521,069 on strand -
pdi-2 (WBGene00003963)	X : 4,524,187 - 4,526,536 on strand +	Protein disulfide-isomerase 2
nhr-35 (WBGene00003628)	X : 4,532,691 - 4,537,534 on strand +	Nuclear hormone receptor family member nhr-35
C07A12.2 (WBGene00015560)	X : 4,544,876 - 4,545,418 on strand +
C07A12.18 (WBGene00206364)	X : 4,545,703 - 4,549,948 on strand -
ham-2 (WBGene00001821)	X : 4,554,691 - 4,559,386 on strand +
C05E11.6 (WBGene00015495)	X : 4,562,195 - 4,562,837 on strand +
amt-4 (WBGene00000136)	X : 4,565,302 - 4,569,393 on strand +	Ammonium transporter
amt-1 (WBGene00000133)	X : 4,571,448 - 4,573,914 on strand +	Putative ammonium transporter 1
C05E11.3 (WBGene00015494)	X : 4,578,249 - 4,581,641 on strand +	Lysosomal-associated transmembrane protein
C05E11.7 (WBGene00015496)	X : 4,581,598 - 4,585,665 on strand -
C05E11.2 (WBGene00015493)	X : 4,586,917 - 4,587,993 on strand +
lnp-1 (WBGene00015492)	X : 4,588,768 - 4,590,447 on strand +
flp-12 (WBGene00001455)	X : 4,591,281 - 4,592,504 on strand -	FMRF-Like Peptide
spat-3 (WBGene00020496)	X : 4,595,997 - 4,605,930 on strand -	Suppressor of PAr-Two defec
pqn-65 (WBGene00004148)	X : 4,610,926 - 4,620,423 on strand -	Prion-like-(Q/N-rich)-domain-bearing protein
C46C11.3 (WBGene00016706)	X : 4,629,037 - 4,631,816 on strand +
C. elegans Node of duplication
F34D10.4 (WBGene00009374)	III : 3,736,602 - 3,739,763 on strand +
F34D10.3 (WBGene00009373)	III : 3,734,243 - 3,734,906 on strand +
F34D10.8 (WBGene00009377)	III : 3,730,829 - 3,731,248 on strand +
evl-18 (WBGene00009372)	III : 3,729,645 - 3,735,039 on strand -
F34D10.9 (WBGene00045484)	III : 3,726,683 - 3,729,570 on strand -
C14B1.9 (WBGene00007580)	III : 3,725,074 - 3,726,500 on strand -
C14B1.12 (WBGene00184990)	III : 3,724,221 - 3,724,980 on strand -
C14B1.7 (WBGene00007578)	III : 3,719,904 - 3,723,597 on strand -	Piwi-like protein
C14B1.8 (WBGene00007579)	III : 3,718,734 - 3,719,673 on strand -
nrde-1 (WBGene00007577)	III : 3,713,463 - 3,718,747 on strand +
alkb-8 (WBGene00007581)	III : 3,709,330 - 3,713,282 on strand +	ALKylated DNA repair protein AlkB homolog
dph-1 (WBGene00007576)	III : 3,706,884 - 3,709,222 on strand +	Diphthamide biosynthesis protein 1
wdr-5.1 (WBGene00006474)	III : 3,705,265 - 3,706,785 on strand +	WD repeat-containing protein wdr-5.1
C14B1.3 (WBGene00007574)	III : 3,703,648 - 3,705,054 on strand +
C14B1.2 (WBGene00007573)	III : 3,702,282 - 3,703,172 on strand +
pdi-1 (WBGene00003962)	III : 3,699,719 - 3,701,476 on strand -	Protein disulfide-isomerase 1
cyn-9 (WBGene00000885)	III : 3,697,820 - 3,699,642 on strand -	Peptidyl-prolyl cis-trans isomerase 9
npr-15 (WBGene00012084)	III : 3,683,256 - 3,685,808 on strand -	Neuropeptide receptor 15
C46F11.6 (WBGene00008121)	III : 3,667,351 - 3,670,436 on strand -
C46F11.4 (WBGene00008119)	III : 3,657,713 - 3,664,494 on strand -
C46F11.5 (WBGene00008120)	III : 3,652,867 - 3,657,602 on strand -
gsr-1 (WBGene00008117)	III : 3,650,906 - 3,653,154 on strand +	Glutathione diSulfide Reductase
madf-8 (WBGene00008118)	III : 3,648,803 - 3,650,832 on strand -	MADF domain transcription facto
unc-93 (WBGene00006822)	III : 3,644,375 - 3,648,822 on strand +	Putative potassium channel regulatory protein unc-93
rilp-1 (WBGene00007860)	III : 3,636,045 - 3,643,672 on strand +	RILP (Rab7-Interacting Lysosomal Protein) homolog
mrps-31 (WBGene00007859)	III : 3,628,240 - 3,630,366 on strand -	28S ribosomal protein S31, mitochondrial
sel-8 (WBGene00004765)	III : 3,613,218 - 3,627,142 on strand -
ptp-1 (WBGene00004213)	III : 3,590,734 - 3,611,993 on strand +	Tyrosine-protein phosphatase 1
C48D5.3 (WBGene00008180)	III : 3,578,832 - 3,581,732 on strand -
nhr-6 (WBGene00003605)	III : 3,573,585 - 3,578,772 on strand +	Nuclear hormone receptor family member nhr-6
C54C6.4 (WBGene00008286)	III : 3,553,649 - 3,556,627 on strand +
Fruitfly
	on strand - = ->
	on strand + = <-
CG7804 (FBgn0036496)	3L : 15,472,197 - 15,474,110 on strand -
CG33259 (FBgn0036495)	3L : 15,407,832 - 15,408,267 on strand +
Toll-6 (FBgn0036494)	3L : 15,336,692 - 15,344,315 on strand +	Toll-6 [Source:FlyBase gene name
CG7255 (FBgn0036493)	3L : 15,304,255 - 15,311,195 on strand +
Best3 (FBgn0036492)	3L : 15,300,915 - 15,302,785 on strand -	Bestrophin 3
Best4 (FBgn0036491)	3L : 15,298,958 - 15,300,942 on strand +	Bestrophin 4
Tollo (FBgn0029114)	3L : 15,235,619 - 15,242,832 on strand +	Tollo
CG6888 (FBgn0036490)	3L : 15,207,844 - 15,208,586 on strand +
CG6878 (FBgn0036488)	3L : 15,161,817 - 15,162,470 on strand +
CG7011 (FBgn0036489)	3L : 15,160,876 - 15,163,628 on strand -
Prp31 (FBgn0036487)	3L : 15,159,100 - 15,161,138 on strand +
Msh6 (FBgn0036486)	3L : 15,154,233 - 15,158,562 on strand -	Msh6
FucTA (FBgn0036485)	3L : 15,147,137 - 15,154,395 on strand +	FucTA
Pex3 (FBgn0036484)	3L : 15,144,355 - 15,146,379 on strand +	Peroxin 3
CG32147 (FBgn0047178)	3L : 15,143,063 - 15,144,059 on strand -
Pdi (FBgn0014002)	3L : 15,137,738 - 15,142,840 on strand -	Protein disulfide isomerase
CG12316 (FBgn0036483	3L : 15,131,508 - 15,136,934 on strand -
CG13457 (FBgn0036482)	3L : 15,127,940 - 15,131,378 on strand -
CG32847 (FBgn0052847)	3L : 15,121,572 - 15,122,301 on strand +
CG16959 (FBgn0036481)	3L : 15,119,878 - 15,125,321 on strand -
Cep135 (FBgn0036480)	3L : 15,116,737 - 15,128,029 on strand +
CG13458 (FBgn0036479)	3L : 15,113,557 - 15,116,373 on strand +
CG45071 (FBgn0266441)	3L : 15,105,882 - 15,110,730 on strand +
CTPsyn (FBgn0266452)	3L : 15,097,914 - 15,113,003 on strand +	CTP synthase
Aats-gly (FBgn0027088)	3L : 15,095,142 - 15,097,686 on strand +	Glycyl-tRNA synthetase
CG6945	3L : 15,090,823 - 15,094,719 on strand -
Or71a (FBgn0036474)	3L : 15,076,907 - 15,078,447 on strand -	Odorant receptor 71a
cp309 (FBgn0086690)	3L : 15,066,081 - 15,094,724 on strand -	cp309
CG13460 (FBgn0036471)	3L : 15,061,029 - 15,061,705 on strand -
CG13463 (FBgn0036470)	3L : 15,054,777 - 15,055,565 on strand +
CG18649 (FBgn0036469)	3L : 15,053,568 - 15,054,135 on strand -

## Sheet: RhoGDI
	RhoGDI Homo
	Homo sapiens
		on strand - = ->
		on strand + = <-
	RFNG (ENSG00000169733)	17 : 82,047,902 - 82,051,831 on strand -	RFNG O-fucosylpeptide 3-beta-N-acetylglucosaminyltransferase
	DCXR (ENSG00000169738)	17 : 82,035,136 - 82,037,732 on strand -	dicarbonyl and L-xylulose reductase
	RAC3 (ENSG00000169750)	17 : 82,031,624 - 82,034,204 on strand +	ras-related C3 botulinum toxin substrate 3
	LRRC45 (ENSG00000169683)	17 : 82,023,302 - 82,031,151 on strand +	leucine rich repeat containing 45
	STRA13 (ENSG00000169689)	17 : 82,018,702 - 82,024,107 on strand -	stimulated by retinoic acid 13
	ASPSCR1 (ENSG00000169696)	17 : 81,976,807 - 82,017,406 on strand +	ASPSCR1, UBX domain containing tether for SLC2A4
	NOTUM (ENSG00000185269)	17 : 81,952,507 - 81,961,840 on strand -	NOTUM, palmitoleoyl-protein carboxylesterase
	MYADML2 (ENSG00000185105)	17 : 81,939,645 - 81,947,233 on strand -	myeloid associated differentiation marker like 2
	PYCR1 (ENSG00000183010)	17 : 81,932,384 - 81,942,412 on strand -	pyrroline-5-carboxylate reductase 1
	MAFG (ENSG00000197063)	17 : 81,918,270 - 81,927,714 on strand -	MAF bZIP transcription factor G
	SIRT7 (ENSG00000187531)	17 : 81,911,939 - 81,921,323 on strand -	sirtuin 7
	PCYT2 (ENSPTRG00000009776)	17 : 81,381,089 - 81,389,754 on strand -	phosphate cytidylyltransferase 2, ethanolamine
	NPB (ENSG00000183979)	17 : 81,900,745 - 81,902,905 on strand +	neuropeptide B
	ANAPC11 (ENSG00000141552)	17 : 81,890,790 - 81,900,991 on strand +	anaphase promoting complex subunit 11
	ALYREF (ENSG00000183684)	17 : 81,887,844 - 81,891,586 on strand -	Aly/REF export factor
	ARHGDIA (ENSG00000141522)	17 : 81,867,721 - 81,871,406 on strand -	Rho GDP dissociation inhibitor alpha
	P4HB (ENSG00000185624)	17 : 81,843,159 - 81,860,694 on strand -	prolyl 4-hydroxylase subunit beta
	PPP1R27 (ENSG00000182676)	17 : 81,833,492 - 81,835,050 on strand -	protein phosphatase 1 regulatory subunit 27
	MCRIP1 (ENSG00000225663)	17 : 81,822,361 - 81,833,302 on strand -	MAPK regulated corepressor interacting protein 1
	GCGR (ENSG00000215644)	17 : 81,804,132 - 81,814,013 on strand +	glucagon receptor
	SLC25A10 (ENSG00000183048)	17 : 81,712,236 - 81,721,016 on strand +	solute carrier family 25 member 10
	RP13-1032I1.10 (ENSG00000262660)	17 : 81,703,371 - 81,720,539 on strand +
	MRPL12 (ENSG00000262814)	17 : 81,703,357 - 81,707,526 on strand +	mitochondrial ribosomal protein L12
	HGS (ENSG00000185359)	17 : 81,683,326 - 81,703,138 on strand +	hepatocyte growth factor-regulated tyrosine kinase substrate
	ARL16 (ENSG00000214087)	17 : 81,681,174 - 81,683,924 on strand -	ADP ribosylation factor like GTPase 16
	CCDC137 (ENSG00000185298)	17 : 81,666,364 - 81,673,904 on strand +	coiled-coil domain containing 137
	OXLD1 (ENSG00000204237)	17 : 81,665,036 - 81,666,635 on strand -	oxidoreductase like domain containing 1
	PDE6G (ENSG00000185527)	17 : 81,650,459 - 81,663,112 on strand -	phosphodiesterase 6G
	TSPAN10 (ENSG00000182612)	17 : 81,637,171 - 81,648,749 on strand +	tetraspanin 10 [
	NPLOC4 (ENSG00000182446)	17 : 81,556,887 - 81,648,465 on strand -	NPL4 homolog, ubiquitin recognition factor
	FAAP100 (ENSG00000185504)	17 : 81,539,885 - 81,553,961 on strand -	Fanconi anemia core complex associated protein 100
	Mouse lemur
		on strand - = ->
		on strand + = <-
	ENSMICG00000033235	KQ055852.1 : 1,046,490 - 1,046,931 on strand -
	ZRANB2 (ENSMICG00000033818)	KQ055852.1 : 1,085,234 - 1,100,395 on strand +	zinc finger RANBP2-type containing 2
	PTGER3 (ENSMICG00000011907)	KQ055852.1 : 1,119,380 - 1,191,710 on strand +	prostaglandin E receptor 3
	UBE2NL (ENSMICG00000014081)	KQ055852.1 : 1,382,794 - 1,394,534 on strand -	ubiquitin conjugating enzyme E2 N like (gene/pseudogene)
	ENSMICG00000035290	KQ055852.1 : 1,496,806 - 1,497,945 on strand +
	CTH (ENSMICG00000016361)	KQ055852.1 : 1,591,300 - 1,708,663 on strand -	cystathionine gamma-lyase
	ANKRD13C (ENSMICG00000016341)	KQ055852.1 : 1,745,773 - 1,825,549 on strand +	ankyrin repeat domain 13C
	SRSF11 (ENSMICG00000005537)	KQ055852.1 : 1,838,546 - 1,867,990 on strand -	serine and arginine rich splicing factor 11
	LRRC7 (ENSMICG00000005504)	KQ055852.1 : 1,972,049 - 2,529,427 on strand -	leucine rich repeat containing 7
	ENSMICG00000001109	KQ056005.1 : 113 - 5,174 on strand -
	ASPSCR1 (ENSMICG00000001102)	KQ056005.1 : 9,638 - 45,638 on strand -	ASPSCR1, UBX domain containing tether for SLC2A4
	NOTUM (ENSMICG00000034707)	KQ056005.1 : 57,965 - 64,957 on strand +	NOTUM, palmitoleoyl-protein carboxylesterase
	PYCR1 (ENSMICG00000004071)	KQ056005.1 : 80,446 - 86,524 on strand +	pyrroline-5-carboxylate reductase 1
	MAFG (ENSMICG00000037828)	KQ056005.1 : 93,392 - 101,273 on strand +	MAF bZIP transcription factor G
	SIRT7 (ENSMICG00000017412)	KQ056005.1 : 101,611 - 107,877 on strand +	sirtuin 7
	PCYT2 (ENSMICG00000017409)	KQ056005.1 : 108,649 - 117,744 on strand +	phosphate cytidylyltransferase 2, ethanolamine
	NPB (ENSMICG00000017408)	KQ056005.1 : 117,327 - 117,784 on strand -	neuropeptide B
	ENSMICG00000026558	KQ056005.1 : 120,549 - 124,766 on strand -
	ALYREF (ENSMICG00000017403)	KQ056005.1 : 125,562 - 130,158 on strand +	Aly/REF export factor
	ENSMICG00000002895	KQ056005.1 : 143,925 - 145,515 on strand +
	P4HB (ENSMICG00000001144)	KQ056005.1 : 151,522 - 161,349 on strand +	prolyl 4-hydroxylase subunit beta
	MCRIP1 (ENSMICG00000028892)	KQ056005.1 : 168,499 - 176,218 on strand +	MAPK regulated corepressor interacting protein 1
	GCGR (ENSMICG00000028550)	KQ056005.1 : 182,753 - 186,829 on strand -	glucagon receptor
	ENSMICG00000008678	KQ056005.1 : 222,341 - 238,752 on strand -
	ENSMICG00000028678	KQ056005.1 : 235,842 - 254,677 on strand -
	HGS (ENSMICG00000008647)	KQ056005.1 : 241,588 - 254,547 on strand -	hepatocyte growth factor-regulated tyrosine kinase substrate
	ARL16 (ENSMICG00000036087)	KQ056005.1 : 254,442 - 256,683 on strand +	ADP ribosylation factor like GTPase 16
	CCDC137 (ENSMICG00000008641)	KQ056005.1 : 261,950 - 267,483 on strand -	coiled-coil domain containing 137
	OXLD1 (ENSMICG00000008636)	KQ056005.1 : 269,156 - 269,536 on strand +	oxidoreductase like domain containing 1
	TSPAN10 (ENSMICG00000008615)	KQ056005.1 : 270,782 - 280,499 on strand -	tetraspanin 10
	PDE6G (ENSMICG00000008627)	KQ056005.1 : 272,362 - 275,299 on strand +	phosphodiesterase 6G
	NPLOC4 (ENSMICG00000008580)	KQ056005.1 : 284,109 - 348,684 on strand +	NPL4 homolog, ubiquitin recognition factor
	FAAP100 (ENSMICG00000008568)	KQ056005.1 : 351,943 - 361,587 on strand +	Fanconi anemia core complex associated protein 100
	FSCN2 (ENSMICG00000031762)	KQ056005.1 : 364,882 - 373,212 on strand -	fascin actin-bundling protein 2, retinal
	ENSMICG00000014863	KQ056005.1 : 388,477 - 391,309 on strand +
	Pika (lagomorpha)
		on strand - = ->
		on strand + = <-
	ENSOPRG00000004467	scaffold_47677 : 239 - 853 on strand +
	INO80 (ENSOPRG00000000831)	GeneScaffold_3722 : 155,294 - 281,507 on strand -	INO80 complex subunit
	ENSOPRG00000000827	GeneScaffold_3722 : 146,951 - 147,866 on strand -
	CHAC1 (ENSOPRG00000000823)	GeneScaffold_3722 : 134,629 - 136,876 on strand +	ChaC glutathione specific gamma-glutamylcyclotransferase 1
	DLL4 (ENSOPRG00000000813)	GeneScaffold_3722 : 114,143 - 121,569 on strand +	delta like canonical Notch ligand 4
	VPS18 (ENSOPRG00000000810)	GeneScaffold_3722 : 82,437 - 93,079 on strand +	VPS18, CORVET/HOPS core subunit
	RHOV (ENSOPRG00000000803)	GeneScaffold_3722 : 55,359 - 56,758 on strand -	ras homolog family member V
	SPINT1 (ENSOPRG00000000792)	GeneScaffold_3722 : 10,553 - 36,375 on strand +	serine peptidase inhibitor, Kunitz type 1
	Cat
	GPS1 (ENSFCAG00000011677)	E1 : 61,964,234 - 61,968,329 on strand +	G protein pathway suppressor 1
	RFNG (ENSFCAG00000024656)	E1 : 61,960,163 - 61,964,266 on strand -	RFNG O-fucosylpeptide 3-beta-N-acetylglucosaminyltransferase
	ENSFCAG00000011675	E1 : 61,942,875 - 61,944,816 on strand -	Uncharacterized protein [
	DCXR (ENSFCAG00000011673)	E1 : 61,935,817 - 61,937,560 on strand -	dicarbonyl and L-xylulose reductase
	RAC3 (ENSFCAG00000011671)	E1 : 61,932,609 - 61,934,235 on strand +	ras-related C3 botulinum toxin substrate 3 (rho family, small GTP binding protein Rac3)
	LRRC45 (ENSFCAG00000011666)	E1 : 61,924,361 - 61,931,629 on strand +	leucine rich repeat containing 45
	ASPSCR1 (ENSFCAG00000011662)	E1 : 61,892,902 - 61,919,358 on strand +	ASPSCR1, UBX domain containing tether for SLC2A4
	NOTUM (ENSFCAG00000011660)	E1 : 61,872,676 - 61,877,833 on strand -	NOTUM, palmitoleoyl-protein carboxylesterase
	MYADML2 (ENSFCAG00000015406)	E1 : 61,864,067 - 61,864,990 on strand -	myeloid associated differentiation marker like 2
	PYCR1 (ENSFCAG00000011659)	E1 : 61,856,350 - 61,859,614 on strand -	pyrroline-5-carboxylate reductase 1
	MAFG (ENSFCAG00000027393)	E1 : 61,846,578 - 61,847,162 on strand -	MAF bZIP transcription factor G
	SIRT7 (ENSFCAG00000007807)	E1 : 61,836,923 - 61,840,322 on strand -	sirtuin 7
	PCYT2 (ENSFCAG00000030456)	E1 : 61,829,451 - 61,835,916 on strand -	phosphate cytidylyltransferase 2, ethanolamine
	ENSFCAG00000016226	E1 : 61,820,188 - 61,825,726 on strand +
	ALYREF (ENSFCAG00000022549)	E1 : 61,815,609 - 61,819,501 on strand -	Aly/REF export factor
	ARHGDIA (ENSFCAG00000030567)	E1 : 61,795,335 - 61,796,605 on strand -	Rho GDP dissociation inhibitor alpha
	P4HB (ENSFCAG00000029560)	E1 : 61,779,593 - 61,789,929 on strand -	prolyl 4-hydroxylase subunit beta
	PPP1R27 (ENSFCAG00000026641)	E1 : 61,775,718 - 61,776,587 on strand -	protein phosphatase 1 regulatory subunit 27
	MCRIP1 (ENSFCAG00000029556)	E1 : 61,769,231 - 61,770,252 on strand -	MAPK regulated corepressor interacting protein 1
	GCGR (ENSFCAG00000016364)	E1 : 61,759,822 - 61,763,382 on strand +	glucagon receptor
	ENSFCAG00000012935	E1 : 61,724,804 - 61,732,377 on strand +
	MRPL12 (ENSFCAG00000012933)	E1 : 61,716,745 - 61,720,516 on strand +	mitochondrial ribosomal protein L12
	HGS (ENSFCAG00000012926)	E1 : 61,700,948 - 61,715,164 on strand +	hepatocyte growth factor-regulated tyrosine kinase substrate
	ARL16 (ENSFCAG00000018816)	E1 : 61,698,793 - 61,700,711 on strand -	ADP ribosylation factor like GTPase 16
	OXLD1 (ENSFCAG00000030118)	E1 : 61,690,448 - 61,691,735 on strand -	oxidoreductase like domain containing 1
	CCDC137 (ENSFCAG00000012925)	E1 : 61,690,293 - 61,695,931 on strand +	coiled-coil domain containing 137
	PDE6G (ENSFCAG00000012923)	E1 : 61,685,410 - 61,686,466 on strand -	phosphodiesterase 6G
	TSPAN10 (ENSFCAG00000012921)	E1 : 61,679,935 - 61,684,690 on strand +	tetraspanin 10
	NPLOC4 (ENSFCAG00000012919)	E1 : 61,615,924 - 61,671,673 on strand -	NPL4 homolog, ubiquitin recognition factor
	FAAP100 (ENSFCAG00000012918)	E1 : 61,601,237 - 61,611,074 on strand -	Fanconi anemia core complex associated protein 100
	FSCN2 (ENSFCAG00000012915)	E1 : 61,593,032 - 61,598,590 on strand +	fascin actin-bundling protein 2, retinal
	FGG (ENSFCAG00000015687)	B1 : 73,904,187 - 73,912,512 on strand +	fibrinogen gamma chain
	FGA (ENSFCAG00000003275)	B1 : 73,924,450 - 73,932,327 on strand +	fibrinogen alpha chain
	FGB (ENSFCAG00000013254)	B1 : 73,945,064 - 73,952,772 on strand -	fibrinogen beta chain
	PLRG1 (ENSFCAG00000031848)	B1 : 73,961,125 - 73,978,253 on strand +	pleiotropic regulator 1
	ENSFCAG00000026673	B1 : 74,039,659 - 74,045,020 on strand +	Uncharacterized protein
	DCHS2 (ENSFCAG00000013313)	B1 : 74,159,043 - 74,279,799 on strand +	dachsous cadherin-related 2
	ENSFCAG00000027141	B1 : 74,164,616 - 74,165,675 on strand -	Uncharacterized protein
	SFRP2 (ENSFCAG00000030236)	B1 : 74,665,505 - 74,673,914 on strand +	secreted frizzled related protein 2
	RNF175 (ENSFCAG00000003015)	B1 : 74,702,862 - 74,740,580 on strand +	ring finger protein 175
	TLR2 (ENSFCAG00000029293)	B1 : 74,745,531 - 74,747,885 on strand -	toll like receptor 2
	KIAA0922 (ENSFCAG00000003011)	B1 : 74,793,154 - 74,965,040 on strand -	KIAA0922
	MND1 (ENSFCAG00000022084)	B1 : 75,020,245 - 75,078,942 on strand -	meiotic nuclear divisions 1
	TRIM2 (ENSFCAG00000031235)	B1 : 75,094,217 - 75,149,486 on strand -	tripartite motif containing 2
	FHDC1 (ENSFCAG00000029150)	B1 : 75,418,869 - 75,451,868 on strand -	FH2 domain containing 1
	ARFIP1 (ENSFCAG00000026832)	B1 : 75,474,379 - 75,589,585 on strand -	ADP ribosylation factor interacting protein 1
	ENSFCAG00000002796	B1 : 75,561,775 - 75,563,195 on strand +	Uncharacterized protein
	TIGD4 (ENSFCAG00000028877)	B1 : 75,612,201 - 75,613,736 on strand +	tigger transposable element derived 4
	FBXW7 (ENSFCAG00000000620)	B1 : 75,818,379 - 76,045,417 on strand +	F-box and WD repeat domain containing 7
	GATB (ENSFCAG00000003207)	B1 : 76,568,842 - 76,655,339 on strand +	glutamyl-tRNA amidotransferase subunit B
	FAM160A1 (ENSFCAG00000025713)	B1 : 76,659,806 - 76,750,144 on strand -	family with sequence similarity 160 member A1
	ENSFCAG00000031404	B1 : 77,072,199 - 77,078,373 on strand -
	ENSFCAG00000027171	B1 : 77,149,719 - 77,158,877 on strand +	Uncharacterized protein
	SH3D19 (ENSFCAG00000011212)	B1 : 77,159,909 - 77,204,414 on strand +	SH3 domain containing 19
	RPS3A (ENSFCAG00000031288)	B1 : 77,220,916 - 77,225,115 on strand -	ribosomal protein S3A
	ENSFCAG00000024391	B1 : 77,232,103 - 77,232,375 on strand -	Uncharacterized protein
	ENSFCAG00000009916	B1 : 77,390,888 - 77,877,668 on strand +	Uncharacterized protein
	MAB21L2 (ENSFCAG00000025743)	B1 : 77,797,777 - 77,798,856 on strand -	mab-21 like 2
	ENSFCAG00000025294	B1 : 77,937,767 - 78,085,845 on strand +	Uncharacterized protein
	DCLK2 (ENSFCAG00000009915)	B1 : 78,087,651 - 78,242,824 on strand -	doublecortin like kinase 2
	ENSFCAG00000022342	B1 : 78,464,456 - 78,980,589 on strand +	Uncharacterized protein
	ENSFCAG00000026514	B1 : 78,607,277 - 78,608,053 on strand -	Uncharacterized protein
	Giant panda
	GPS1 (ENSAMEG00000017330)	GL192350.1 : 195,910 - 200,561 on strand -	G protein pathway suppressor 1
	RFNG (ENSAMEG00000017344)	GL192350.1 : 200,018 - 203,875 on strand +	RFNG O-fucosylpeptide 3-beta-N-acetylglucosaminyltransferase
	ENSAMEG00000017356	GL192350.1 : 222,591 - 228,383 on strand +
	RAC3 (ENSAMEG00000017364)	GL192350.1 : 230,764 - 232,212 on strand -	ras-related C3 botulinum toxin substrate 3 (rho family, small GTP binding protein Rac3)
	LRRC45 (ENSAMEG00000017370)	GL192350.1 : 233,926 - 240,972 on strand -	leucine rich repeat containing 45
	STRA13 (ENSAMEG00000017384)	GL192350.1 : 243,976 - 244,737 on strand +	stimulated by retinoic acid 13
	ASPSCR1 (ENSAMEG00000017387)	GL192350.1 : 246,448 - 271,009 on strand -	ASPSCR1, UBX domain containing tether for SLC2A4
	NOTUM (ENSAMEG00000017398)	GL192350.1 : 282,562 - 291,368 on strand +	NOTUM, palmitoleoyl-protein carboxylesterase
	MYADML2 (ENSAMEG00000018834)	GL192350.1 : 297,110 - 298,033 on strand +	myeloid associated differentiation marker like 2
	PYCR1 (ENSAMEG00000017407)	GL192350.1 : 301,789 - 350,164 on strand +	pyrroline-5-carboxylate reductase 1
	MAFG (ENSAMEG00000017419)	GL192350.1 : 314,285 - 314,864 on strand +	MAF bZIP transcription factor G
	SIRT7 (ENSAMEG00000017425)	GL192350.1 : 319,630 - 324,964 on strand +	sirtuin 7
	PCYT2 (ENSAMEG00000017430)	GL192350.1 : 324,135 - 331,853 on strand +	phosphate cytidylyltransferase 2, ethanolamine
	ENSAMEG00000017462	GL192350.1 : 337,189 - 341,482 on strand -
	ALYREF (ENSAMEG00000017463)	GL192350.1 : 342,019 - 346,496 on strand +	Aly/REF export factor
	ARHGDIA (ENSAMEG00000017468)	GL192350.1 : 362,388 - 363,687 on strand +	Rho GDP dissociation inhibitor alpha
	P4HB (ENSAMEG00000017476)	GL192350.1 : 369,883 - 378,940 on strand +	prolyl 4-hydroxylase subunit beta
	PPP1R27 (ENSAMEG00000017493)	GL192350.1 : 384,302 - 385,165 on strand +	protein phosphatase 1 regulatory subunit 27
	MCRIP1 (ENSAMEG00000017494)	GL192350.1 : 392,235 - 393,318 on strand +	MAPK regulated corepressor interacting protein 1
	GCGR (ENSAMEG00000017496)	GL192350.1 : 401,737 - 405,529 on strand -	glucagon receptor
	ENSAMEG00000017519	GL192350.1 : 435,827 - 450,375 on strand -
	HGS (ENSAMEG00000017535)	GL192350.1 : 452,538 - 466,575 on strand -	hepatocyte growth factor-regulated tyrosine kinase substrate
	ARL16 (ENSAMEG00000017559)	GL192350.1 : 466,787 - 468,692 on strand +	ADP ribosylation factor like GTPase 16
	CCDC137 (ENSAMEG00000017561)	GL192350.1 : 471,675 - 475,822 on strand -	coiled-coil domain containing 137
	OXLD1 (ENSAMEG00000017566)	GL192350.1 : 476,229 - 477,116 on strand +	oxidoreductase like domain containing 1
	PDE6G (ENSAMEG00000017568)	GL192350.1 : 480,810 - 481,961 on strand +	phosphodiesterase 6G
	TSPAN10 (ENSAMEG00000017574)	GL192350.1 : 483,805 - 487,665 on strand -	tetraspanin 10
	NPLOC4 (ENSAMEG00000017577)	GL192350.1 : 495,823 - 553,055 on strand +	NPL4 homolog, ubiquitin recognition factor [
	FNIP1 (ENSAMEG00000017595)	GL192350.1 : 562,993 - 710,753 on strand -	folliculin interacting protein 1
	MEIKIN (ENSAMEG00000017611)	GL192350.1 : 730,375 - 798,482 on strand -	meiotic kinetochore factor
	ENSAMEG00000017615	GL192350.1 : 805,853 - 867,340 on strand -
	ENSAMEG00000009257	GL193896.1 : 201,529 - 202,122 on strand +
	Frog
	myadml2 (ENSXETG00000005379)	GL172918.1 : 1,482,106 - 1,483,026 on strand -	myeloid-associated differentiation marker-like 2
	pycr1 (ENSXETG00000005381)	GL172918.1 : 1,463,562 - 1,476,242 on strand -	pyrroline-5-carboxylate reductase family, member 1
	ENSXETG00000002594	GL172918.1 : 1,456,869 - 1,457,456 on strand +
	mafg (ENSXETG00000005386)	GL172918.1 : 1,448,882 - 1,449,600 on strand -	v-maf avian musculoaponeurotic fibrosarcoma oncogene homolog G
	sirt7 (ENSXETG00000005388)	GL172918.1 : 1,431,246 - 1,437,816 on strand -	sirtuin 7
	pcyt2 (ENSXETG00000005389)	GL172918.1 : 1,408,953 - 1,423,634 on strand -	phosphate cytidylyltransferase 2, ethanolamine
	NPB (ENSXETG00000033774)	GL172918.1 : 1,388,922 - 1,390,463 on strand +	neuropeptide B
	alyref (ENSXETG00000005391)	GL172918.1 : 1,368,611 - 1,374,724 on strand -	Aly/REF export factor
	ENSXETG00000033135	GL172918.1 : 1,364,863 - 1,366,325 on strand -
	arhgdia (ENSXETG00000025477)	GL172918.1 : 1,354,105 - 1,361,500 on strand -	Rho GDP dissociation inhibitor (GDI) alpha
	ENSXETG00000030289	GL172918.1 : 1,332,098 - 1,333,456 on strand -
	p4hb (ENSXETG00000005405)	GL172918.1 : 1,293,250 - 1,303,208 on strand -	prolyl 4-hydroxylase, beta polypeptide
	ppp1r27 (ENSXETG00000005419)	GL172918.1 : 1,275,311 - 1,291,416 on strand -	protein phosphatase 1, regulatory subunit 27
	fam195b (ENSXETG00000005420)	GL172918.1 : 1,250,340 - 1,264,373 on strand -	family with sequence similarity 195, member B
	gcgr (ENSXETG00000005421)	GL172918.1 : 1,174,540 - 1,186,944 on strand +	glucagon receptor
	slc25a10 (ENSXETG00000019705)	GL172918.1 : 1,091,484 - 1,115,960 on strand +	solute carrier family 25 (mitochondrial carrier; dicarboxylate transporter), member 10
	hgs (ENSXETG00000019701)	GL172918.1 : 1,070,978 - 1,087,565 on strand +	hepatocyte growth factor-regulated tyrosine kinase substrate
	slc16a3 (ENSXETG00000019700)	GL172918.1 : 1,036,040 - 1,050,599 on strand +	solute carrier family 16
	fasn (ENSXETG00000019666)	GL172918.1 : 892,576 - 919,755 on strand -	fatty acid synthase
	dus1l (ENSXETG00000019654)	GL172918.1 : 868,634 - 885,364 on strand -	dihydrouridine synthase 1-like
	gps1 (ENSXETG00000019653)	GL172918.1 : 853,065 - 865,859 on strand +	G protein pathway suppressor 1
	rfng (ENSXETG00000019657)	GL172918.1 : 843,591 - 851,203 on strand -	RFNG O-fucosylpeptide 3-beta-N-acetylglucosaminyltransferase
	card14 (ENSXETG00000019652)	GL172918.1 : 787,724 - 812,304 on strand -	caspase recruitment domain family, member 14
	sgsh (ENSXETG00000019651)	GL172918.1 : 769,291 - 779,481 on strand +	N-sulfoglucosamine sulfohydrolase
	slc26a11 (ENSXETG00000019624)	GL172918.1 : 750,758 - 764,460 on strand -	solute carrier family 26 (anion exchanger), member 11
	myadml2 (ENSXETG00000005379)	GL172918.1 : 1,482,106 - 1,483,026 on strand -	myeloid-associated differentiation marker-like 2
	pycr1 (ENSXETG00000005381)	GL172918.1 : 1,463,562 - 1,476,242 on strand -	pyrroline-5-carboxylate reductase family, member 1
	ENSXETG00000002594	GL172918.1 : 1,456,869 - 1,457,456 on strand +
	mafg (ENSXETG00000005386)	GL172918.1 : 1,448,882 - 1,449,600 on strand -	v-maf avian musculoaponeurotic fibrosarcoma oncogene homolog G
	sirt7 (ENSXETG00000005388)	GL172918.1 : 1,431,246 - 1,437,816 on strand -	sirtuin 7
	pcyt2 (ENSXETG00000005389)	GL172918.1 : 1,408,953 - 1,423,634 on strand -	phosphate cytidylyltransferase 2, ethanolamine
	NPB (ENSXETG00000033774)	GL172918.1 : 1,388,922 - 1,390,463 on strand +	neuropeptide B
	alyref (ENSXETG00000005391)	GL172918.1 : 1,368,611 - 1,374,724 on strand -	Aly/REF export factor
	ENSXETG00000033135	GL172918.1 : 1,364,863 - 1,366,325 on strand -
	arhgdia (ENSXETG00000025477)	GL172918.1 : 1,354,105 - 1,361,500 on strand -	Rho GDP dissociation inhibitor (GDI) alpha
	ENSXETG00000030289	GL172918.1 : 1,332,098 - 1,333,456 on strand -
	p4hb (ENSXETG00000005405)	GL172918.1 : 1,293,250 - 1,303,208 on strand -	prolyl 4-hydroxylase, beta polypeptide
	ppp1r27 (ENSXETG00000005419)	GL172918.1 : 1,275,311 - 1,291,416 on strand -	protein phosphatase 1, regulatory subunit 27
	fam195b (ENSXETG00000005420)	GL172918.1 : 1,250,340 - 1,264,373 on strand -	family with sequence similarity 195, member B
	gcgr (ENSXETG00000005421)	GL172918.1 : 1,174,540 - 1,186,944 on strand +	glucagon receptor
	slc25a10 (ENSXETG00000019705)	GL172918.1 : 1,091,484 - 1,115,960 on strand +	solute carrier family 25 (mitochondrial carrier; dicarboxylate transporter), member 10
	hgs (ENSXETG00000019701)	GL172918.1 : 1,070,978 - 1,087,565 on strand +	hepatocyte growth factor-regulated tyrosine kinase substrate
	slc16a3 (ENSXETG00000019700)	GL172918.1 : 1,036,040 - 1,050,599 on strand +	solute carrier family 16
	fasn (ENSXETG00000019666)	GL172918.1 : 892,576 - 919,755 on strand -	fatty acid synthase
	dus1l (ENSXETG00000019654)	GL172918.1 : 868,634 - 885,364 on strand -	dihydrouridine synthase 1-like
	gps1 (ENSXETG00000019653)	GL172918.1 : 853,065 - 865,859 on strand +	G protein pathway suppressor 1
	rfng (ENSXETG00000019657)	GL172918.1 : 843,591 - 851,203 on strand -	RFNG O-fucosylpeptide 3-beta-N-acetylglucosaminyltransferase
	card14 (ENSXETG00000019652)	GL172918.1 : 787,724 - 812,304 on strand -	caspase recruitment domain family, member 14
	sgsh (ENSXETG00000019651)	GL172918.1 : 769,291 - 779,481 on strand +	N-sulfoglucosamine sulfohydrolase
	slc26a11 (ENSXETG00000019624)	GL172918.1 : 750,758 - 764,460 on strand -	solute carrier family 26 (anion exchanger), member 11
	Coelacanth
		on strand - = ->
		on strand + = <-
	GPS1 (ENSLACG00000012243)	JH126596.1 : 693,631 - 712,828 on strand -	G protein pathway suppressor 1
	ENSLACG00000011914	JH126596.1 : 651,231 - 652,292 on strand +
	DUS1L (ENSLACG00000011348)	JH126596.1 : 593,043 - 642,531 on strand +	dihydrouridine synthase 1 like
	LRRC45 (ENSLACG00000011122)	JH126596.1 : 569,738 - 590,601 on strand +	leucine rich repeat containing 45
	CXorf57 (ENSLACG00000010847)	JH126596.1 : 540,292 - 559,794 on strand +	chromosome X open reading frame 57
	NOTUM (ENSLACG00000010522)	JH126596.1 : 511,622 - 535,128 on strand +	NOTUM, palmitoleoyl-protein carboxylesterase
	ASPSCR1 (ENSLACG00000009319)	JH126596.1 : 411,517 - 492,920 on strand -	ASPSCR1, UBX domain containing tether for SLC2A4
	STRA13 (ENSLACG00000022125)	JH126596.1 : 400,730 - 407,683 on strand +	stimulated by retinoic acid 13
	SIRT7 (ENSLACG00000008982)	JH126596.1 : 385,279 - 400,266 on strand -	sirtuin 7
	pycr1a (ENSLACG00000008611)	JH126596.1 : 357,081 - 375,952 on strand -	pyrroline-5-carboxylate reductase 1a
	ENSLACG00000008166	JH126596.1 : 324,547 - 354,617 on strand -
	PCYT2 (ENSLACG00000007326)	JH126596.1 : 269,603 - 296,802 on strand -	phosphate cytidylyltransferase 2, ethanolamine
	gnav1 (ENSLACG00000006337)	JH126596.1 : 213,074 - 267,515 on strand -	guanine nucleotide binding protein (G protein) alpha v1
	NPB (ENSLACG00000006178)	JH126596.1 : 204,856 - 207,139 on strand +	neuropeptide B
	ALYREF (ENSLACG00000005694)	JH126596.1 : 180,319 - 194,653 on strand -	Aly/REF export factor
	ARHGDIA (ENSLACG00000005116)	JH126596.1 : 152,499 - 175,252 on strand -	Rho GDP dissociation inhibitor alpha
	anapc11 (ENSLACG00000004812)	JH126596.1 : 139,873 - 149,792 on strand -	APC11 anaphase promoting complex subunit 11 homolog (yeast)
	P4HB (ENSLACG00000003663)	JH126596.1 : 90,753 - 126,432 on strand -	prolyl 4-hydroxylase subunit beta
	PPP1R27 (ENSLACG00000003211)	JH126596.1 : 74,350 - 85,376 on strand -	protein phosphatase 1 regulatory subunit 27
	si:dkey-40g16.6 (1 of many) (ENSLACG00000002264)	JH126596.1 : 44,811 - 70,448 on strand +
	Tetraodon
		on strand - = ->
		on strand + = <-
	SMARCE1 (1 of many) (ENSTNIG00000014150)	18 : 1,390,391 - 1,393,658 on strand -	SWI/SNF related, matrix associated, actin dependent regulator of chromatin, subfamily e, member 1
	IGFBP4 (ENSTNIG00000014149)	18 : 1,397,305 - 1,405,064 on strand -	insulin like growth factor binding protein 4
	IKZF3 (ENSTNIG00000014148)	18 : 1,411,150 - 1,414,723 on strand +	IKAROS family zinc finger 3
	MLLT6 (ENSTNIG00000014147)	18 : 1,416,235 - 1,426,487 on strand +	MLLT6, PHD finger domain containing
	PCGF2 (ENSTNIG00000014146)	18 : 1,432,816 - 1,435,669 on strand -	polycomb group ring finger 2
	PIP4K2B (ENSTNIG00000014145)	18 : 1,437,504 - 1,441,506 on strand +	phosphatidylinositol-5-phosphate 4-kinase type 2 beta
	psmb3 (ENSTNIG00000014144)	18 : 1,442,656 - 1,443,640 on strand	proteasome subunit beta 3
	cwc25 (ENSTNIG00000014143)	18 : 1,445,320 - 1,447,681 on strand -	CWC25 spliceosome-associated protein homolog (S. cerevisiae)
	zgc:77358 (ENSTNIG00000014142)	18 : 1,449,841 - 1,450,721 on strand -	Sp6 transcription factor
	scrn2 (ENSTNIG00000014141)	18 : 1,459,733 - 1,463,446 on strand +	secernin 2
	pla2g12b (ENSTNIG00000014140)	18 : 1,470,814 - 1,472,343 on strand -	phospholipase A2, group XIIB
	anapc11 (ENSTNIG00000014139)	18 : 1,473,715 - 1,474,403 on strand +	APC11 anaphase promoting complex subunit 11 homolog (yeast)
	ppp1r27b (ENSTNIG00000014138)	18 : 1,474,581 - 1,475,717 on strand -	protein phosphatase 1, regulatory subunit 27b
	p4hb (ENSTNIG00000014137)	18 : 1,477,559 - 1,483,124 on strand -	prolyl 4-hydroxylase, beta polypeptide
	ENSTNIG00000014136	18 : 1,484,732 - 1,486,535 on strand
	arhgdia (1 of many) (ENSTNIG00000014135)	18 : 1,487,190 - 1,491,518 on strand +	Rho GDP dissociation inhibitor (GDI) alpha
	ftr99 (ENSTNIG00000014134)	18 : 1,493,524 - 1,495,676 on strand +	finTRIM family, member 99
	ENSTNIG00000014133	18 : 1,496,443 - 1,498,753 on strand -
	PITPNC1 (1 of many) (ENSTNIG00000014132)	18 : 1,511,330 - 1,516,572 on strand -	phosphatidylinositol transfer protein, cytoplasmic 1
	helz (ENSTNIG00000014131)	18 : 1,544,469 - 1,567,124 on strand +	helicase with zinc finger
	cacng5a (ENSTNIG00000014130)	18 : 1,588,641 - 1,602,109 on strand -	calcium channel, voltage-dependent, gamma subunit 5a
	ENSTNIG00000014129	18 : 1,609,604 - 1,620,564 on strand -
	ENSTNIG00000014128	18 : 1,657,612 - 1,657,782 on strand -	Uncharacterized protein
	APOH (ENSTNIG00000014127)	18 : 1,659,951 - 1,664,708 on strand +	apolipoprotein H
	nol11 (ENSTNIG00000014126)	18 : 1,665,095 - 1,670,728 on strand +	nucleolar protein 11
	BPTF (1 of many) (ENSTNIG00000014125)	18 : 1,672,831 - 1,693,458 on strand +	bromodomain PHD finger transcription factor
	ENSTNIG00000014122	18 : 1,701,631 - 1,720,790 on strand -
	si:ch211-239f4.1 (ENSTNIG00000014124)	18 : 1,703,225 - 1,709,022 on strand +	ecotropic viral integration site 5 like
	ENSTNIG00000014123	18 : 1,717,483 - 1,718,269 on strand -
	trappc5 (ENSTNIG00000014121)	18 : 1,721,652 - 1,723,396 on strand +	trafficking protein particle complex 5
	mcoln1a (ENSTNIG00000014120)	18 : 1,725,959 - 1,730,318 on strand +	mucolipin 1a
	cacna1ha (ENSTNIG00000011607)	Un_random : 7,263,332 - 7,291,680 on strand +	calcium channel, voltage-dependent, T type, alpha 1H subunit a
	epn2 (ENSTNIG00000011606)	Un_random : 7,198,383 - 7,204,139 on strand +	epsin 2
	grapa (ENSTNIG00000011605)	Un_random : 7,178,908 - 7,192,066 on strand -	GRB2-related adaptor protein a
	ENSTNIG00000011604	Un_random : 7,171,934 - 7,176,112 on strand -
	SPHK1 (1 of many) (ENSTNIG00000011603)	Un_random : 7,153,074 - 7,161,795 on strand +	sphingosine kinase 1
	ENSTNIG00000011602	Un_random : 7,146,624 - 7,151,333 on strand +
	cygb1 (ENSTNIG00000011601)	Un_random : 7,136,485 - 7,141,746 on strand +	cytoglobin 1
	PRPSAP1 (ENSTNIG00000011600)	Un_random : 7,129,378 - 7,134,664 on strand -	phosphoribosyl pyrophosphate synthetase associated protein 1
	zgc:153845 (ENSTNIG00000011599)	Un_random : 7,125,216 - 7,125,836 on strand +	zgc:153845
	MGAT5B (ENSTNIG00000011598)	Un_random : 7,085,120 - 7,117,221 on strand -	mannosyl (alpha-1,6-)-glycoprotein beta-1,6-N-acetyl-glucosaminyltransferase, isozyme B
	sec14l1 (ENSTNIG00000011597)	Un_random : 7,067,990 - 7,075,722 on strand -	SEC14-like lipid binding 1
	nptx1l (ENSTNIG00000017504)	Un_random : 7,048,312 - 7,050,092 on strand +	neuronal pentraxin 1 like
	ENSTNIG00000011596	Un_random : 6,966,995 - 6,969,803 on strand -
	ppp1r27a (ENSTNIG00000001681)	Un_random : 6,956,475 - 6,957,223 on strand -	protein phosphatase 1, regulatory subunit 27a
	alyref (ENSTNIG00000011595)	Un_random : 6,948,940 - 6,951,815 on strand -	Aly/REF export factor
	arhgdia (1 of many) (ENSTNIG00000011594)	Un_random : 6,942,663 - 6,943,934 on strand -	Rho GDP dissociation inhibitor (GDI) alpha
	cdr2l (ENSTNIG00000011593)	Un_random : 6,938,134 - 6,941,434 on strand +	cerebellar degeneration-related protein 2-like
	recql5 (ENSTNIG00000011592)	Un_random : 6,929,510 - 6,936,253 on strand +	RecQ helicase-like 5
	ENSTNIG00000011591	Un_random : 6,928,100 - 6,928,842 on strand +
	xylt2 (ENSTNIG00000011590)	Un_random : 6,905,536 - 6,913,045 on strand -	xylosyltransferase II
	RAB37 (1 of many) (ENSTNIG00000011589)	Un_random : 6,893,167 - 6,898,932 on strand -	RAB37, member RAS oncogene family
	RAB37 (1 of many) (ENSTNIG00000011588)	Un_random : 6,887,990 - 6,890,573 on strand -	RAB37, member RAS oncogene family
	SLC9A3R1 (ENSTNIG00000011587)	Un_random : 6,873,523 - 6,885,861 on strand -	SLC9A3 regulator 1
	atp2a1 (ENSTNIG00000011586)	Un_random : 6,856,018 - 6,866,016 on strand -	ATPase, Ca++ transporting, cardiac muscle, fast twitch 1
	rabep2 (ENSTNIG00000011585)	Un_random : 6,850,330 - 6,854,538 on strand +	rabaptin, RAB GTPase binding effector protein 2
	nudt9 (ENSTNIG00000011584)	Un_random : 6,843,273 - 6,844,967 on strand +	nudix (nucleoside diphosphate linked moiety X)-type motif 9
	mapk3 (ENSTNIG00000011583)	Un_random : 6,837,639 - 6,841,619 on strand -	mitogen-activated protein kinase 3
	gdpd3b (ENSTNIG00000011582)	Un_random : 6,830,798 - 6,834,151 on strand -	glycerophosphodiester phosphodiesterase domain containing 3b
	ypel3 (ENSTNIG00000002428)	Un_random : 6,826,843 - 6,828,102 on strand -	yippee-like 3
	ATP6V0C (1 of many) (ENSTNIG00000011581)	Un_random : 6,822,694 - 6,824,872 on strand -	ATPase H+ transporting V0 subunit c
	spsb3a (ENSTNIG00000011580)	Un_random : 6,818,619 - 6,820,413 on strand -	splA/ryanodine receptor domain and SOCS box containing 3a
	Fugu
		on strand - = ->
		on strand + = <-
	SMARCE1 (1 of many) (ENSTRUG00000006702)	scaffold_244 : 132,427 - 136,363 on strand +	SWI/SNF related, matrix associated, actin dependent regulator of chromatin, subfamily e, member 1
	IGFBP4 (ENSTRUG00000006441)	scaffold_244 : 120,104 - 128,650 on strand +	insulin like growth factor binding protein 4
	IKZF3 (ENSTRUG00000005964)	scaffold_244 : 110,579 - 114,620 on strand -	IKAROS family zinc finger 3
	MLLT6 (ENSTRUG00000005677)	scaffold_244 : 97,239 - 108,161 on strand -	MLLT6, PHD finger domain containing
	PCGF2 (ENSTRUG00000005461)	scaffold_244 : 86,897 - 90,737 on strand +	polycomb group ring finger 2
	PIP4K2B (ENSTRUG00000005059)	scaffold_244 : 80,467 - 83,485 on strand -	phosphatidylinositol-5-phosphate 4-kinase type 2 beta
	psmb3 (ENSTRUG00000004911)	scaffold_244 : 77,314 - 79,189 on strand +	proteasome subunit beta 3
	cwc25 (ENSTRUG00000004650)	scaffold_244 : 73,714 - 76,504 on strand +	CWC25 spliceosome-associated protein homolog (S. cerevisiae)
	ENSTRUG00000004645	scaffold_244 : 69,921 - 70,373 on strand +
	scrn2 (ENSTRUG00000004440)	scaffold_244 : 54,297 - 59,974 on strand -	secernin 2
	pla2g12b (ENSTRUG00000004301)	scaffold_244 : 44,425 - 46,093 on strand +	phospholipase A2, group XIIB
	anapc11 (ENSTRUG00000004285)	scaffold_244 : 42,250 - 42,917 on strand -	APC11 anaphase promoting complex subunit 11 homolog (yeast)
	ppp1r27b (ENSTRUG00000004244)	scaffold_244 : 40,794 - 41,540 on strand +	protein phosphatase 1, regulatory subunit 27b
	p4hb (ENSTRUG00000003279)	scaffold_244 : 31,623 - 38,707 on strand +	prolyl 4-hydroxylase, beta polypeptide
	ENSTRUG00000003051	scaffold_244 : 28,043 - 29,972 on strand -
	arhgdia (1 of many) (ENSTRUG00000002555)	scaffold_244 : 22,539 - 26,565 on strand -	Rho GDP dissociation inhibitor (GDI) alpha
	ftr99 (ENSTRUG00000001904)	scaffold_244 : 15,664 - 18,391 on strand -	finTRIM family, member 99
	ENSTRUG00000001894	scaffold_244 : 14,698 - 15,469 on strand +
	ENSTRUG00000001840	scaffold_244 : 5,981 - 12,446 on strand -
	ENSTRUG00000008955	scaffold_294 : 267,358 - 273,698 on strand -
	ppp1r27a (ENSTRUG00000008938)	scaffold_294 : 257,213 - 257,981 on strand -	protein phosphatase 1, regulatory subunit 27a
	fam195b (ENSTRUG00000008931)	scaffold_294 : 254,136 - 255,921 on strand -	family with sequence similarity 195, member B
	alyref (ENSTRUG00000008828)	scaffold_294 : 249,957 - 252,482 on strand -	Aly/REF export factor
	arhgdia (1 of many) (ENSTRUG00000008537)	scaffold_294 : 242,253 - 244,814 on strand -	Rho GDP dissociation inhibitor (GDI) alpha
	ENSTRUG00000008528	scaffold_294 : 236,710 - 239,860 on strand +
	recql5 (ENSTRUG00000008246)	scaffold_294 : 227,327 - 235,074 on strand +	RecQ helicase-like 5
	xylt2 (ENSTRUG00000008009)	scaffold_294 : 207,955 - 215,867 on strand -	xylosyltransferase II
	SLC9A3R1 (1 of many) (ENSTRUG00000007970)	scaffold_294 : 176,601 - 191,194 on strand -	SLC9A3 regulator 1
	atp2a1 (ENSTRUG00000006271)	scaffold_294 : 155,239 - 168,100 on strand -	ATPase, Ca++ transporting, cardiac muscle, fast twitch 1
	nudt9 (ENSTRUG00000006123)	scaffold_294 : 141,380 - 143,594 on strand +	nudix (nucleoside diphosphate linked moiety X)-type motif 9
	mapk3 (ENSTRUG00000005697)	scaffold_294 : 135,552 - 140,802 on strand -	mitogen-activated protein kinase 3
	gdpd3b (ENSTRUG00000005467)	scaffold_294 : 126,890 - 130,617 on strand -	glycerophosphodiester phosphodiesterase domain containing 3b
	ATP6V0C (1 of many) (ENSTRUG00000005326)	scaffold_294 : 117,157 - 119,669 on strand -	ATPase H+ transporting V0 subunit c
	spsb3a (ENSTRUG00000005089)	scaffold_294 : 112,885 - 114,719 on strand -	splA/ryanodine receptor domain and SOCS box containing 3a
	mrps34 (ENSTRUG00000005029)	scaffold_294 : 109,760 - 110,713 on strand -	mitochondrial ribosomal protein S34
	nme3 (ENSTRUG00000004800)	scaffold_294 : 107,469 - 108,977 on strand -	NME/NM23 nucleoside diphosphate kinase 3
	mapk8ip3 (ENSTRUG00000004041)	scaffold_294 : 90,311 - 106,071 on strand +	mitogen-activated protein kinase 8 interacting protein 3
	hn1l (ENSTRUG00000003866)	scaffold_294 : 84,186 - 86,825 on strand +	HN1-like
	cramp1 (ENSTRUG00000003674)	scaffold_294 : 73,306 - 81,280 on strand -	cramped chromatin regulator homolog 1
	Amazon molly	01:03:00
	MLLT6 (1 of many) (ENSPFOG00000017235)	KI519621.1 : 5,036,142 - 5,063,773 on strand -	MLLT6, PHD finger domain containing
	CISD3 (1 of many) (ENSPFOG00000017231)	KI519621.1 : 5,033,123 - 5,035,789 on strand -	CDGSH iron sulfur domain 3
	CISD3 (1 of many) (ENSPFOG00000017229)	KI519621.1 : 5,028,481 - 5,031,256 on strand -	CDGSH iron sulfur domain 3
	PCGF2 (ENSPFOG00000017202)	KI519621.1 : 5,018,730 - 5,028,438 on strand +	polycomb group ring finger 2
	PIP4K2B (ENSPFOG00000017188)	KI519621.1 : 5,002,724 - 5,014,041 on strand -	phosphatidylinositol-5-phosphate 4-kinase type 2 beta
	psmb3 (ENSPFOG00000017177)	KI519621.1 : 4,995,588 - 5,000,363 on strand +	proteasome subunit beta 3
	cwc25 (ENSPFOG00000017152)	KI519621.1 : 4,991,375 - 4,995,171 on strand +	CWC25 spliceosome-associated protein homolog (S. cerevisiae)
	zgc:77358 (ENSPFOG00000020694)	KI519621.1 : 4,985,530 - 4,986,417 on strand +	Sp6 transcription factor
	scrn2 (ENSPFOG00000017119)	KI519621.1 : 4,946,647 - 4,954,721 on strand -	secernin 2
	ENSPFOG00000017094	KI519621.1 : 4,940,193 - 4,943,372 on strand -
	arhgdia (1 of many) (ENSPFOG00000017079)	KI519621.1 : 4,919,210 - 4,940,128 on strand -	Rho GDP dissociation inhibitor (GDI) alpha
	ppp1r12c	KI519621.1 : 4,899,977 - 4,918,068 on strand +	protein phosphatase 1, regulatory subunit 12C
	QPRT (ENSPFOG00000017019)	KI519621.1 : 4,891,935 - 4,898,071 on strand -	quinolinate phosphoribosyltransferase
	zmp:0000001082 (ENSPFOG00000016975)	KI519621.1 : 4,874,421 - 4,890,604 on strand -	zmp:0000001082
	anapc11 (ENSPFOG00000016972)	KI519621.1 : 4,870,418 - 4,872,403 on strand +	APC11 anaphase promoting complex subunit 11 homolog (yeast)
	pla2g12b (ENSPFOG00000016957)	KI519621.1 : 4,849,654 - 4,854,022 on strand +	phospholipase A2, group XIIB
	ppp1r27b (ENSPFOG00000016955)	KI519621.1 : 4,839,442 - 4,840,808 on strand +	protein phosphatase 1, regulatory subunit 27b
	p4hb (ENSXMAG00000017988)	JH556748.1 : 1,381,682 - 1,393,778 on strand +	prolyl 4-hydroxylase, beta polypeptide
	ENSPFOG00000016892	KI519621.1 : 4,799,902 - 4,819,934 on strand +
	rptor (ENSPFOG00000016673)	KI519621.1 : 4,647,646 - 4,796,942 on strand +	regulatory associated protein of MTOR, complex 1
	NPTX1 (1 of many) (ENSPFOG00000016641)	KI519621.1 : 4,613,335 - 4,630,873 on strand -	neuronal pentraxin 1
	ENDOV (ENSPFOG00000016616)	KI519621.1 : 4,542,519 - 4,598,447 on strand +	endonuclease V
	SEC14L1 (1 of many) (ENSPFOG00000016508)	KI519621.1 : 4,508,339 - 4,539,782 on strand -	SEC14 like lipid binding 1
	rasal3 (ENSPFOG00000016501)	KI519621.1 : 4,488,140 - 4,503,357 on strand -	RAS protein activator like 3
	trim25 (1 of many) (ENSPFOG00000016457)	KI519621.1 : 4,478,935 - 4,487,627 on strand -	tripartite motif containing 25
	trim25 (1 of many) (ENSPFOG00000024623)	KI519621.1 : 4,468,047 - 4,478,153 on strand -	tripartite motif containing 25
	FBF1 (ENSPFOG00000004924)	KI519956.1 : 7,024 - 17,551 on strand -	Fas binding factor 1
	cygb1 (ENSPFOG00000005172)	KI519956.1 : 29,558 - 36,823 on strand -	cytoglobin 1
	PRPSAP1 (1 of many) (ENSPFOG00000005209)	KI519956.1 : 42,123 - 50,761 on strand +	phosphoribosyl pyrophosphate synthetase associated protein 1
	PRPSAP1 (1 of many) (ENSPFOG00000005316)	KI519956.1 : 53,192 - 61,801 on strand +	phosphoribosyl pyrophosphate synthetase associated protein 1
	zgc:153845 (1 of many) (ENSPFOG00000020033)	KI519956.1 : 67,599 - 68,226 on strand -	zgc:153845
	ENSPFOG00000021677	KI519956.1 : 79,387 - 80,024 on strand -	Uncharacterized protein
	MGAT5B (1 of many) (ENSPFOG00000005388)	KI519956.1 : 90,061 - 160,732 on strand +	mannosyl (alpha-1,6-)-glycoprotein beta-1,6-N-acetyl-glucosaminyltransferase, isozyme B
	sec14l1 (ENSPFOG00000005442)	KI519956.1 : 176,334 - 188,334 on strand +	SEC14-like lipid binding 1
	nptx1l (ENSPFOG00000005862)	KI519956.1 : 232,414 - 237,245 on strand -	neuronal pentraxin 1 like
	ENSPFOG00000005947	KI519956.1 : 348,868 - 355,907 on strand +
	ppp1r27a (ENSPFOG00000006053)	KI519956.1 : 369,467 - 371,658 on strand +	protein phosphatase 1, regulatory subunit 27a
	fam195b (ENSPFOG00000006074)	KI519956.1 : 372,085 - 375,134 on strand +	family with sequence similarity 195, member B
	alyref (ENSPFOG00000022825)	KI519956.1 : 375,816 - 380,589 on strand +	Aly/REF export factor
	arhgdia (1 of many) (ENSPFOG00000006085)	KI519956.1 : 380,873 - 391,395 on strand +	Rho GDP dissociation inhibitor (GDI) alpha
	cdr2l (1 of many) (ENSPFOG00000022961)	KI519956.1 : 393,382 - 396,034 on strand -	cerebellar degeneration-related protein 2-like
	arhgdia (1 of many) (ENSPFOG00000006151)	KI519956.1 : 401,158 - 405,829 on strand +	Rho GDP dissociation inhibitor (GDI) alpha
	cdr2l (1 of many) (ENSPFOG00000006187)	KI519956.1 : 406,355 - 413,889 on strand -	cerebellar degeneration-related protein 2-like
	recql5 (ENSPFOG00000006282)	KI519956.1 : 414,537 - 429,522 on strand -	RecQ helicase-like 5
	si:ch211-120g10.1 (ENSPFOG00000006613)	KI519956.1 : 430,658 - 435,629 on strand -	si:ch211-120g10.1
	si:ch73-364h19.1 (ENSPFOG00000006682)	KI519956.1 : 439,208 - 444,913 on strand -	si:ch73-364h19.1
	xylt2 (ENSPFOG00000006722)	KI519956.1 : 446,896 - 461,566 on strand +	xylosyltransferase II
	RAB37 (ENSPFOG00000024467)	KI519956.1 : 470,549 - 486,243 on strand +	RAB37, member RAS oncogene family
	SLC9A3R1 (1 of many) (ENSPFOG00000006957)	KI519956.1 : 490,323 - 516,079 on strand +	SLC9A3 regulator 1
	atp2a1 (ENSPFOG00000007092)	KI519956.1 : 536,702 - 555,967 on strand +	ATPase, Ca++ transporting, cardiac muscle, fast twitch 1
	rabep2 (ENSPFOG00000007894)	KI519956.1 : 555,560 - 559,895 on strand -	rabaptin, RAB GTPase binding effector protein 2
	si:ch211-11k18.4 (ENSPFOG00000007976)	KI519956.1 : 564,096 - 571,731 on strand -	si:ch211-11k18.4
	nudt9 (ENSPFOG00000008083)	KI519956.1 : 571,834 - 579,521 on strand -	nudix (nucleoside diphosphate linked moiety X)-type motif 9
	mapk3 (ENSPFOG00000008154)	KI519956.1 : 580,509 - 592,323 on strand +	mitogen-activated protein kinase 3
	gdpd3b (ENSPFOG00000008288)	KI519956.1 : 595,673 - 603,421 on strand +	glycerophosphodiester phosphodiesterase domain containing 3b
	FBF1 (ENSPFOG00000004924)	KI519956.1 : 7,024 - 17,551 on strand -	Fas binding factor 1
	cygb1 (ENSPFOG00000005172)	KI519956.1 : 29,558 - 36,823 on strand -	cytoglobin 1
	PRPSAP1 (1 of many) (ENSPFOG00000005209)	KI519956.1 : 42,123 - 50,761 on strand +	phosphoribosyl pyrophosphate synthetase associated protein 1
	PRPSAP1 (1 of many) (ENSPFOG00000005316)	KI519956.1 : 53,192 - 61,801 on strand +	phosphoribosyl pyrophosphate synthetase associated protein 1
	zgc:153845 (1 of many) (ENSPFOG00000020033)	KI519956.1 : 67,599 - 68,226 on strand -	zgc:153845
	ENSPFOG00000021677	KI519956.1 : 79,387 - 80,024 on strand -	Uncharacterized protein
	MGAT5B (1 of many) (ENSPFOG00000005388)	KI519956.1 : 90,061 - 160,732 on strand +	mannosyl (alpha-1,6-)-glycoprotein beta-1,6-N-acetyl-glucosaminyltransferase, isozyme B
	sec14l1 (ENSPFOG00000005442)	KI519956.1 : 176,334 - 188,334 on strand +	SEC14-like lipid binding 1
	nptx1l (ENSPFOG00000005862)	KI519956.1 : 232,414 - 237,245 on strand -	neuronal pentraxin 1 like
	ENSPFOG00000005947	KI519956.1 : 348,868 - 355,907 on strand +
	ppp1r27a (ENSPFOG00000006053)	KI519956.1 : 369,467 - 371,658 on strand +	protein phosphatase 1, regulatory subunit 27a
	fam195b (ENSPFOG00000006074)	KI519956.1 : 372,085 - 375,134 on strand +	family with sequence similarity 195, member B
	alyref (ENSPFOG00000022825)	KI519956.1 : 375,816 - 380,589 on strand +	Aly/REF export factor
	arhgdia (1 of many) (ENSPFOG00000006085)	KI519956.1 : 380,873 - 391,395 on strand +	Rho GDP dissociation inhibitor (GDI) alpha
	cdr2l (1 of many) (ENSPFOG00000022961)	KI519956.1 : 393,382 - 396,034 on strand -	cerebellar degeneration-related protein 2-like
	arhgdia (1 of many) (ENSPFOG00000006151)	KI519956.1 : 401,158 - 405,829 on strand +	Rho GDP dissociation inhibitor (GDI) alpha
	cdr2l (1 of many) (ENSPFOG00000006187)	KI519956.1 : 406,355 - 413,889 on strand -	cerebellar degeneration-related protein 2-like
	recql5 (ENSPFOG00000006282)	KI519956.1 : 414,537 - 429,522 on strand -	RecQ helicase-like 5
	si:ch211-120g10.1 (ENSPFOG00000006613)	KI519956.1 : 430,658 - 435,629 on strand -	si:ch211-120g10.1
	si:ch73-364h19.1 (ENSPFOG00000006682)	KI519956.1 : 439,208 - 444,913 on strand -	si:ch73-364h19.1
	xylt2 (ENSPFOG00000006722)	KI519956.1 : 446,896 - 461,566 on strand +	xylosyltransferase II
	RAB37 (ENSPFOG00000024467)	KI519956.1 : 470,549 - 486,243 on strand +	RAB37, member RAS oncogene family
	SLC9A3R1 (1 of many) (ENSPFOG00000006957)	KI519956.1 : 490,323 - 516,079 on strand +	SLC9A3 regulator 1
	atp2a1 (ENSPFOG00000007092)	KI519956.1 : 536,702 - 555,967 on strand +	ATPase, Ca++ transporting, cardiac muscle, fast twitch 1
	rabep2 (ENSPFOG00000007894)	KI519956.1 : 555,560 - 559,895 on strand -	rabaptin, RAB GTPase binding effector protein 2
	si:ch211-11k18.4 (ENSPFOG00000007976)	KI519956.1 : 564,096 - 571,731 on strand -	si:ch211-11k18.4
	nudt9 (ENSPFOG00000008083)	KI519956.1 : 571,834 - 579,521 on strand -	nudix (nucleoside diphosphate linked moiety X)-type motif 9
	mapk3 (ENSPFOG00000008154)	KI519956.1 : 580,509 - 592,323 on strand +	mitogen-activated protein kinase 3
	gdpd3b (ENSPFOG00000008288)	KI519956.1 : 595,673 - 603,421 on strand +	glycerophosphodiester phosphodiesterase domain containing 3b
	ypel3 (ENSPFOG00000022327)	KI519956.1 : 606,398 - 608,753 on strand +	yippee-like 3
	ATP6V0C (ENSPFOG00000008362)	KI519956.1 : 613,099 - 620,530 on strand +	ATPase H+ transporting V0 subunit c
	Platyfish
		on strand - = ->
		on strand + = <-
	ENSXMAG00000018192	JH556748.1 : 1,714,665 - 1,726,227 on strand -
	ccr7 (ENSXMAG00000018191)	JH556748.1 : 1,682,876 - 1,688,177 on strand +	chemokine (C-C motif) receptor 7
	SMARCE1 (1 of many) (ENSXMAG00000018179)	JH556748.1 : 1,666,608 - 1,679,669 on strand +	SWI/SNF related, matrix associated, actin dependent regulator of chromatin, subfamily e, member 1
	IGFBP4 (ENSXMAG00000018176)	JH556748.1 : 1,641,488 - 1,660,804 on strand +	insulin like growth factor binding protein 4
	IKZF3 (ENSXMAG00000018173)	JH556748.1 : 1,616,561 - 1,636,916 on strand -	IKAROS family zinc finger 3
	MLLT6 (ENSXMAG00000018158)	JH556748.1 : 1,589,704 - 1,615,375 on strand -	MLLT6, PHD finger domain containing
	CISD3 (1 of many) (ENSXMAG00000018157)	JH556748.1 : 1,583,394 - 1,586,055 on strand -	CDGSH iron sulfur domain 3
	CISD3 (1 of many) (ENSXMAG00000018154)	JH556748.1 : 1,579,537 - 1,579,881 on strand -	CDGSH iron sulfur domain 3
	PCGF2 (ENSXMAG00000018149)	JH556748.1 : 1,570,206 - 1,577,469 on strand +	polycomb group ring finger 2
	PIP4K2B (ENSXMAG00000018124)	JH556748.1 : 1,549,768 - 1,563,787 on strand -	phosphatidylinositol-5-phosphate 4-kinase type 2 beta
	psmb3 (ENSXMAG00000018120)	JH556748.1 : 1,544,485 - 1,549,418 on strand +	proteasome subunit beta 3
	cwc25 (ENSXMAG00000018113)	JH556748.1 : 1,540,106 - 1,544,065 on strand +	CWC25 spliceosome-associated protein homolog (S. cerevisiae)
	zgc:77358 (ENSXMAG00000018112)	JH556748.1 : 1,534,171 - 1,535,133 on strand +	Sp6 transcription factor
	scrn2 (ENSXMAG00000018095)	JH556748.1 : 1,501,852 - 1,511,634 on strand -	secernin 2
	ENSXMAG00000018086	JH556748.1 : 1,498,249 - 1,501,705 on strand -
	arhgdia (1 of many) (ENSXMAG00000018079)	JH556748.1 : 1,477,912 - 1,497,986 on strand -	Rho GDP dissociation inhibitor (GDI) alpha
	ppp1r12c (ENSXMAG00000018058)	JH556748.1 : 1,459,333 - 1,477,755 on strand +	protein phosphatase 1, regulatory subunit 12C
	QPRT (ENSXMAG00000018052)	JH556748.1 : 1,449,725 - 1,457,396 on strand -	quinolinate phosphoribosyltransferase
	zmp:0000001082 (ENSXMAG00000018022)	JH556748.1 : 1,431,017 - 1,448,598 on strand -	zmp:0000001082
	anapc11 (ENSXMAG00000018021)	JH556748.1 : 1,427,089 - 1,430,011 on strand +	APC11 anaphase promoting complex subunit 11 homolog (yeast)
	pla2g12b (ENSXMAG00000018014)	JH556748.1 : 1,405,778 - 1,409,373 on strand +	phospholipase A2, group XIIB
	ppp1r27b (ENSXMAG00000018013)	JH556748.1 : 1,395,517 - 1,397,179 on strand +	protein phosphatase 1, regulatory subunit 27b
	p4hb (ENSXMAG00000017988)	JH556748.1 : 1,381,682 - 1,393,778 on strand +	prolyl 4-hydroxylase, beta polypeptide
	ENSXMAG00000017986	JH556748.1 : 1,356,688 - 1,368,836 on strand +
	rptor (ENSXMAG00000017957)	JH556748.1 : 1,214,634 - 1,353,406 on strand +	regulatory associated protein of MTOR, complex 1
	NPTX1 (1 of many) (ENSXMAG00000017951)	JH556748.1 : 1,190,928 - 1,196,843 on strand -	neuronal pentraxin 1
	ENDOV (ENSXMAG00000017948)	JH556748.1 : 1,124,367 - 1,135,764 on strand +	endonuclease V
	SEC14L1 (1 of many) (ENSXMAG00000017937)	JH556748.1 : 1,094,254 - 1,121,688 on strand -	SEC14 like lipid binding 1
	rasal3 (ENSXMAG00000017931)	JH556748.1 : 1,077,307 - 1,090,944 on strand -	RAS protein activator like 3
	trim25 (ENSXMAG00000017928)	JH556748.1 : 1,068,735 - 1,074,516 on strand -	tripartite motif containing 25
	ENSXMAG00000017926	JH556748.1 : 1,050,241 - 1,061,663 on strand -
	epn2 (ENSXMAG00000012394)	JH556840.1 : 1,095,852 - 1,107,528 on strand +	epsin 2
	grapa (ENSXMAG00000012385)	JH556840.1 : 1,045,237 - 1,071,358 on strand -	GRB2-related adaptor protein a
	SPHK1 (1 of many) (ENSXMAG00000012369)	JH556840.1 : 994,550 - 1,015,670 on strand +	sphingosine kinase 1
	FBF1 (ENSXMAG00000012344)	JH556840.1 : 979,190 - 991,930 on strand +	Fas binding factor 1
	cygb1 (ENSXMAG00000012342)	JH556840.1 : 962,689 - 971,021 on strand +	cytoglobin 1
	PRPSAP1 (1 of many) (ENSXMAG00000012322)	JH556840.1 : 946,430 - 956,592 on strand -	phosphoribosyl pyrophosphate synthetase associated protein 1
	zgc:153845 (1 of many) (ENSXMAG00000019674)	JH556840.1 : 941,568 - 942,194 on strand +	zgc:153845
	MGAT5B (1 of many) (ENSXMAG00000012304)	JH556840.1 : 824,850 - 896,068 on strand -	mannosyl (alpha-1,6-)-glycoprotein beta-1,6-N-acetyl-glucosaminyltransferase, isozyme B
	sec14l1 (ENSXMAG00000012280)	JH556840.1 : 792,853 - 805,158 on strand -	SEC14-like lipid binding 1
	nptx1l (ENSXMAG00000012264)	JH556840.1 : 753,042 - 757,268 on strand +	neuronal pentraxin 1 like
	ENSXMAG00000012237	JH556840.1 : 615,719 - 624,971 on strand -
	ppp1r27a (ENSXMAG00000012234)	JH556840.1 : 602,991 - 605,100 on strand -	protein phosphatase 1, regulatory subunit 27a
	fam195b (ENSXMAG00000012233)	JH556840.1 : 600,044 - 601,609 on strand -	family with sequence similarity 195, member B
	alyref (ENSXMAG00000012218)	JH556840.1 : 593,079 - 598,491 on strand -	Aly/REF export factor
	arhgdia (1 of many) (ENSXMAG00000012202)	JH556840.1 : 581,680 - 591,522 on strand -	Rho GDP dissociation inhibitor (GDI) alpha
	cdr2l (ENSXMAG00000012181)	JH556840.1 : 562,309 - 579,334 on strand +	cerebellar degeneration-related protein 2-like
	recql5 (ENSXMAG00000012133)	JH556840.1 : 546,668 - 562,151 on strand +	RecQ helicase-like 5
	si:ch211-120g10.1 (ENSXMAG00000012130)	JH556840.1 : 540,927 - 545,836 on strand +	si:ch211-120g10.1
	xylt2 (ENSXMAG00000012122)	JH556840.1 : 517,077 - 529,492 on strand -	xylosyltransferase II
	RAB37 (ENSXMAG00000012108)	JH556840.1 : 488,592 - 504,093 on strand -	RAB37, member RAS oncogene family
	SLC9A3R1 (1 of many) (ENSXMAG00000012101)	JH556840.1 : 458,962 - 484,574 on strand -	SLC9A3 regulator 1
	atp2a1 (ENSXMAG00000012051)	JH556840.1 : 423,827 - 443,710 on strand -	ATPase, Ca++ transporting, cardiac muscle, fast twitch 1
	rabep2 (ENSXMAG00000012046)	JH556840.1 : 418,332 - 423,966 on strand +	rabaptin, RAB GTPase binding effector protein 2
	nudt9 (ENSXMAG00000012034)	JH556840.1 : 401,682 - 409,023 on strand +	nudix (nucleoside diphosphate linked moiety X)-type motif 9
	mapk3 (ENSXMAG00000011987)	JH556840.1 : 389,502 - 400,216 on strand -	mitogen-activated protein kinase 3
	gdpd3b (ENSXMAG00000011975)	JH556840.1 : 376,859 - 385,465 on strand -	glycerophosphodiester phosphodiesterase domain containing 3b
	ypel3 (ENSXMAG00000011970)	JH556840.1 : 370,109 - 375,468 on strand -	yippee-like 3
	ATP6V0C (1 of many) (ENSXMAG00000011963)	JH556840.1 : 358,171 - 366,706 on strand -	ATPase H+ transporting V0 subunit c
	spsb3a (ENSXMAG00000011957)	JH556840.1 : 351,532 - 358,161 on strand +	splA/ryanodine receptor domain and SOCS box containing 3a
	mrps34 (ENSXMAG00000011943)	JH556840.1 : 347,492 - 350,101 on strand -	mitochondrial ribosomal protein S34
	Medaka
		on strand - = ->
		on strand + = <-
	ltv1 (ENSORLG00000001375)	1 : 3,180,021 - 3,189,256 on strand +	LTV1 ribosome biogenesis factor
	ENSORLG00000001378	1 : 3,180,066 - 3,180,787 on strand -
	ENSORLG00000001387	1 : 3,191,287 - 3,206,948 on strand -
	ENSORLG00000001391	1 : 3,216,639 - 3,220,415 on strand +
	ENSORLG00000001396	1 : 3,233,276 - 3,234,604 on strand -
	ENSORLG00000001400	1 : 3,235,019 - 3,235,790 on strand -
	ENSORLG00000001411	1 : 3,255,653 - 3,258,177 on strand +
	ENSORLG00000001417	1 : 3,260,237 - 3,263,345 on strand -
	akt3b (ENSORLG00000001445)	1 : 3,277,165 - 3,291,351 on strand +	v-akt murine thymoma viral oncogene homolog 3b
	pus10 (ENSORLG00000001472)	1 : 3,295,718 - 3,302,738 on strand -	pseudouridylate synthase 10
	cct4 (ENSORLG00000001511)	1 : 3,303,006 - 3,310,870 on strand +	chaperonin containing TCP1, subunit 4 (delta)
	fam161a (ENSORLG00000001528)	1 : 3,311,540 - 3,318,564 on strand +	family with sequence similarity 161, member A [
	XPO1 (1 of many) (ENSORLG00000001559)	1 : 3,321,598 - 3,338,464 on strand +	exportin 1
	USP34 (ENSORLG00000001605)	1 : 3,351,241 - 3,387,682 on strand +	ubiquitin specific peptidase 34
	ENSORLG00000001620	1 : 3,673,251 - 3,676,669 on strand +
	arhgdia (1 of many) (ENSORLG00000001629)	1 : 3,678,205 - 3,686,320 on strand +	Rho GDP dissociation inhibitor (GDI) alpha
	ENSORLG00000001632	1 : 3,749,606 - 3,752,025 on strand +
	ENSORLG00000001635	1 : 3,765,894 - 3,770,869 on strand +
	zmp:0000001082 (ENSORLG00000001648)	1 : 3,777,198 - 3,793,420 on strand +	zmp:0000001082
	ENSORLG00000001655	1 : 3,798,104 - 3,799,293 on strand -
	pla2g12b (ENSORLG00000001665)	1 : 3,804,857 - 3,808,118 on strand +	phospholipase A2, group XIIB
	ENSORLG00000001668	1 : 3,808,985 - 3,811,954 on strand -
	ENSORLG00000001670	1 : 3,818,401 - 3,819,365 on strand -
	anapc11 (ENSORLG00000001673)	1 : 3,827,663 - 3,830,237 on strand +	APC11 anaphase promoting complex subunit 11 homolog (yeast)
	ppp1r27b (ENSORLG00000001675)	1 : 3,830,650 - 3,831,740 on strand -	protein phosphatase 1, regulatory subunit 27b
	p4hb (ENSORLG00000001698)	1 : 3,834,605 - 3,846,832 on strand -	prolyl 4-hydroxylase, beta polypeptide
	ENSORLG00000001707	1 : 3,856,205 - 3,877,026 on strand -
	rptor (ENSORLG00000001734)	1 : 3,882,243 - 3,993,708 on strand -	regulatory associated protein of MTOR, complex 1
	NPTX1 (1 of many) (ENSORLG00000001756)	1 : 4,084,529 - 4,087,303 on strand +	neuronal pentraxin 1
	ENDOV (ENSORLG00000001763)	1 : 4,154,947 - 4,193,170 on strand -	endonuclease V
	SEC14L1 (1 of many) (ENSORLG00000001808)	1 : 4,196,025 - 4,216,488 on strand -	SEC14 like lipid binding 1
	epn2 (ENSORLG00000012588)	8 : 16,418,748 - 16,435,131 on strand +	epsin 2
	grapa (ENSORLG00000012559)	8 : 16,366,999 - 16,404,450 on strand -	GRB2-related adaptor protein a
	ENSORLG00000012538	8 : 16,348,894 - 16,358,599 on strand -
	SPHK1 (1 of many) (ENSORLG00000012532)	8 : 16,311,597 - 16,325,267 on strand +	sphingosine kinase 1
	ENSORLG00000012514	8 : 16,286,763 - 16,288,389 on strand -
	ENSORLG00000012509	8 : 16,280,711 - 16,286,944 on strand +
	PRPSAP1 (1 of many) (ENSORLG00000012497)	8 : 16,235,394 - 16,243,978 on strand -	phosphoribosyl pyrophosphate synthetase associated protein
	cygb1 (ENSORLG00000012468)	8 : 16,231,232 - 16,264,104 on strand +	Oryzias latipes cytoglobin-1 (cygb1), mRNA.
	MGAT5B (ENSORLG00000012449)	8 : 16,104,987 - 16,198,869 on strand -	mannosyl (alpha-1,6-)-glycoprotein beta-1,6-N-acetyl-glucosaminyltransferase, isozyme B
	sec14l1 (ENSORLG00000012410)	8 : 16,025,656 - 16,045,948 on strand -	SEC14-like lipid binding 1
	nptx1l (ENSORLG00000012368)	8 : 15,970,802 - 15,973,124 on strand +	neuronal pentraxin 1 like
	pecam1 (ENSORLG00000012356)	8 : 15,839,140 - 15,844,204 on strand -	platelet/endothelial cell adhesion molecule 1
	ppp1r27a (ENSORLG00000012345)	8 : 15,826,688 - 15,827,576 on strand -	protein phosphatase 1, regulatory subunit 27a
	fam195b (ENSORLG00000012338)	8 : 15,822,125 - 15,824,541 on strand -	family with sequence similarity 195, member B
	alyref (ENSORLG00000012331)	8 : 15,817,306 - 15,820,275 on strand -	Aly/REF export factor
	arhgdia (1 of many) (ENSORLG00000012323)	8 : 15,809,645 - 15,815,962 on strand -	Rho GDP dissociation inhibitor (GDI) alpha
	cdr2l (ENSORLG00000012304)	8 : 15,803,122 - 15,807,732 on strand +	cerebellar degeneration-related protein 2-like
	recql5 (ENSORLG00000012294)	8 : 15,788,110 - 15,800,443 on strand +	RecQ helicase-like 5
	ENSORLG00000012256	8 : 15,780,470 - 15,784,797 on strand +
	si:ch73-364h19.1 (ENSORLG00000012251)	8 : 15,770,202 - 15,774,493 on strand +	si:ch73-364h19.1
	xylt2 (ENSORLG00000012244)	8 : 15,757,787 - 15,766,836 on strand -	Oryzias latipes protein-O-xylosyltransferase II (xt-ii), mRNA
	RAB37 (ENSORLG00000012199)	8 : 15,736,147 - 15,752,159 on strand -	RAB37, member RAS oncogene family
	SLC9A3R1 (ENSORLG00000012182)	8 : 15,709,458 - 15,732,432 on strand -	SLC9A3 regulator 1
	atp2a1 (ENSORLG00000012163)	8 : 15,681,518 - 15,694,912 on strand -	ATPase, Ca++ transporting, cardiac muscle, fast twitch 1
	ENSORLG00000012024	8 : 15,672,097 - 15,677,268 on strand +
	ENSORLG00000012015	8 : 15,663,224 - 15,667,409 on strand +
	nudt9 (ENSORLG00000012004)	8 : 15,657,262 - 15,661,938 on strand +	nudix (nucleoside diphosphate linked moiety X)-type motif 9
	mapk3 (ENSORLG00000011993)	8 : 15,646,719 - 15,654,782 on strand -	mitogen-activated protein kinase 3
	gdpd3b (ENSORLG00000011954)	8 : 15,634,431 - 15,642,239 on strand -	glycerophosphodiester phosphodiesterase domain containing 3b
	ypela (ENSORLG00000011915)	8 : 15,629,253 - 15,632,483 on strand -	Oryzias latipes yippee-like a (ypela), mRNA
	ATP6V0C (1 of many) (ENSORLG00000011910)	8 : 15,620,804 - 15,625,741 on strand -	ATPase H+ transporting V0 subunit c
	Zebrafish
		on strand - = ->
		on strand + = <-
	si:ch73-281f12.4 (ENSDARG00000059567)	3 : 58,655,434 - 58,739,508 on strand -	si:ch73-281f12.4
	luc7l3 (ENSDARG00000014366)	3 : 58,746,483 - 58,764,456 on strand -	LUC7-like 3 pre-mRNA splicing factor
	CU570684.2 (ENSDARG00000040601)	3 : 58,769,034 - 58,772,376 on strand -
	igl1c3 (ENSDARG00000078975)	3 : 58,773,999 - 58,775,870 on strand +	immunoglobulin light 1 constant 3
	CU570684.1 (ENSDARG00000040599)	3 : 58,777,326 - 58,777,762 on strand -
	CU570684.3 (ENSDARG00000078774)	3 : 58,783,082 - 58,783,511 on strand -
	CU570684.4 (ENSDARG00000088141)	3 : 58,785,150 - 58,790,211 on strand -
	CABZ01044157.1 (ENSDARG00000101356)	3 : 58,925,300 - 58,932,730 on strand +
	zgc:153845 (ENSDARG00000099238)	3 : 58,992,291 - 58,993,782 on strand +	zgc:153845
	prpsap1 (ENSDARG00000099222)	3 : 59,011,021 - 59,197,155 on strand -	phosphoribosyl pyrophosphate synthetase-associated protein 1
	nptx1l (ENSDARG00000074671)	3 : 59,162,016 - 59,179,356 on strand -	neuronal pentraxin 1 like
	pecam1 (ENSDARG00000060263)	3 : 59,491,910 - 59,525,948 on strand +	platelet/endothelial cell adhesion molecule 1
	ppp1r27a (ENSDARG00000060265)	3 : 59,561,085 - 59,567,796 on strand +	protein phosphatase 1, regulatory subunit 27a
	fam195b (ENSDARG00000078383)	3 : 59,573,808 - 59,585,761 on strand +	family with sequence similarity 195, member B
	alyref (ENSDARG00000077732)	3 : 59,589,107 - 59,599,428 on strand +	Aly/REF export factor
	arhgdia (ENSDARG00000043795)	3 : 59,608,351 - 59,656,108 on strand +	Rho GDP dissociation inhibitor (GDI) alpha
	cdr2l (ENSDARG00000026834)	3 : 59,659,895 - 59,690,351 on strand -	cerebellar degeneration-related protein 2-like
	recql5 (ENSDARG00000059556)	3 : 59,695,019 - 59,736,207 on strand -	RecQ helicase-like 5
	si:ch211-110e21.3 (ENSDARG00000089338)	3 : 59,716,602 - 59,725,613 on strand +	si:ch211-110e21.3
	si:ch211-110e21.4 (ENSDARG00000076807)	3 : 59,743,120 - 59,808,664 on strand +	si:ch211-110e21.4
	CR352258.1 (ENSDARG00000101372)	3 : 59,753,661 - 59,787,369 on strand +
	zgc:113030 (ENSDARG00000069869)	3 : 59,753,679 - 59,783,062 on strand +	zgc:113030
	si:ch211-110e21.4 (ENSDARG00000103341)	3 : 59,753,683 - 59,765,397 on strand +	si:ch211-110e21.4
	CR352258.2 (ENSDARG00000102150)	3 : 59,830,151 - 59,831,212 on strand +
	si:ch211-120g10.1 (ENSDARG00000090930)	3 : 59,838,747 - 59,851,429 on strand -	si:ch211-120g10.1
	si:ch73-364h19.1 (ENSDARG00000097523)	3 : 59,855,208 - 59,884,369 on strand -	si:ch73-364h19.1
	xylt2 (ENSDARG00000059557)	3 : 59,886,578 - 59,937,322 on strand +	xylosyltransferase II
	sec14l1 (ENSDARG00000098821)	3 : 60,035,539 - 60,073,779 on strand +	SEC14-like lipid binding 1
	si:ch211-214b16.4 (ENSDARG00000074345)	3 : 60,076,544 - 60,193,223 on strand -	si:ch211-214b16.4
	si:ch211-214b16.3 (ENSDARG00000089079)	3 : 60,077,065 - 60,100,334 on strand -	si:ch211-214b16.3
	si:ch211-214b16.2 (ENSDARG00000102593)	3 : 60,105,671 - 60,107,515 on strand -	si:ch211-214b16.2
	D. Melanogaster
		on strand - = ->
		on strand + = <-
	trc (FBgn0003744)	3L : 19,830,864 - 19,834,304 on strand -	tricornered
	CG32221 (FBgn0052221)	3L : 19,834,670 - 19,836,413 on strand +
	kto (FBgn0001324)	3L : 19,836,614 - 19,844,944 on strand +	kohtalo
	Papss (FBgn0020389)	3L : 19,845,293 - 19,860,925 on strand +	PAPS synthetase
	Rab8 (FBgn0262518)	3L : 19,867,488 - 19,871,078 on strand -	Rab8
	CG8334 (FBgn0036913)	3L : 19,871,139 - 19,881,783 on strand +
	Mi-2 (FBgn0262519)	3L : 19,882,051 - 19,910,215 on strand -	Mi-2 ortholog
	Su(Tpl) (FBgn0014037)	3L : 19,889,120 - 19,909,410 on strand -	Su(Tpl)
	Prp3 (FBgn0036915)	3L : 19,910,300 - 19,912,504 on strand +	Precursor RNA processing 3
	Mtr3 (FBgn0036916)	3L : 19,912,405 - 19,913,715 on strand -	Mtr3
	Rpn1 (FBgn0028695)	3L : 19,915,051 - 19,918,160 on strand +	Regulatory particle non-ATPase 1
	Su(z)12 (FBgn0020887)	3L : 19,918,242 - 19,923,462 on strand -	Su(z)12
	CG7770 (FBgn0036918)	3L : 19,923,671 - 19,924,688 on strand +
	Grasp65 (FBgn0036919)	3L : 19,924,943 - 19,927,175 on strand +	Grasp65
	CG8004 (FBgn0036920)	3L : 19,927,194 - 19,928,508 on strand -
	RhoGDI (FBgn0036921)	3L : 19,928,743 - 19,932,930 on strand +	RhoGDI
	Ac76E (FBgn0004852)	3L : 19,939,287 - 19,977,960 on strand +	Adenylyl cyclase 76E
	CG32219 (FBgn0052219)	3L : 19,950,023 - 19,951,135 on strand -
	CG34258 (FBgn0085287)	3L : 19,951,235 - 19,951,968 on strand -
	CG33710 (FBgn0053710)	3L : 19,951,954 - 19,952,790 on strand -
	CG42655 (FBgn0261507)	3L : 19,952,971 - 19,953,712 on strand -
	CG42654 (FBgn0261506)	3L : 19,953,794 - 19,954,526 on strand -
	CG42263 (FBgn0259148)	3L : 19,954,547 - 19,955,799 on strand -
	CG14182 (FBgn0036922)	3L : 19,978,713 - 19,979,812 on strand -
	CG17732 (FBgn0036923)	3L : 19,981,685 - 19,984,191 on strand +
	hale (FBgn0036924)	3L : 19,984,426 - 19,985,868 on strand -	hale-bopp
	schuy (FBgn0036925)	3L : 19,986,093 - 19,988,072 on strand +	schumacher-levy
	Csas (FBgn0052220)	3L : 19,988,027 - 19,988,947 on strand -	CMP-sialic acid synthase
	fln (FBgn0005633)	3L : 19,989,551 - 19,991,220 on strand -	flightin
	CG7646 (FBgn0036926)	3L : 19,991,887 - 19,996,269 on strand +
	Nca (FBgn0013303)	3L : 19,991,887 - 19,997,568 on strand +	Neurocalcin

## Sheet: PDIA2
	PDIA2
	Human
		Chromossome
	POLR3K (ENSG00000161980)	16	46,407 - 53,628 on strand -	RNA polymerase III subunit K
	SNRNP25 (ENSG00000161981)	16	53,010 - 57,669 on strand +	small nuclear ribonucleoprotein U11/U12 subunit 25
	RHBDF1 (ENSG00000007384)	16	58,059 - 76,355 on strand -	rhomboid 5 homolog 1
	MPG (ENSG00000103152)	16	77,007 - 85,853 on strand +	N-methylpurine DNA glycosylase
	NPRL3 (ENSG00000103148)	16	84,271 - 138,860 on strand -	NPR3 like, GATOR1 complex subunit
	HBZ (ENSG00000130656)	16	152,687 - 154,503 on strand +	hemoglobin subunit zeta
	HBM (ENSG00000206177)	16	153,892 - 166,768 on strand +	hemoglobin subunit mu
	HBA2 (ENSG00000188536)	16	172,847 - 173,710 on strand +	hemoglobin subunit alpha 2
	HBA1 (ENSG00000206172)	16	176,680 - 177,522 on strand +	hemoglobin subunit alpha 1
	HBQ1 (ENSG00000086506)	16	180,453 - 181,181 on strand +	hemoglobin subunit theta 1
	LUC7L (ENSG00000007392)	16	188,969 - 229,463 on strand -	LUC7 like
	FAM234A (ENSG00000167930)	16	234,546 - 268,971 on strand +	family with sequence similarity 234 member A
	AC004754.3 (ENSG00000269881)	16	249,547 - 269,943 on strand +
	RGS11 (ENSG00000076344)	16	268,301 - 275,980 on strand -	regulator of G-protein signaling 11
	ARHGDIG (ENSG00000242173)	16	268,727 - 283,010 on strand +	Rho GDP dissociation inhibitor gamma
	PDIA2 (ENSG00000185615)	16	283,152 - 287,215 on strand +	protein disulfide isomerase family A member 2
	AXIN1 (ENSG00000103126)	16	287,440 - 352,673 on strand -	axin 1
	MRPL28 (ENSG00000086504)	16	367,384 - 370,527 on strand -	mitochondrial ribosomal protein L28
	TMEM8A (ENSG00000129925)	16	370,773 - 387,113 on strand -	transmembrane protein 8A
	NME4 (ENSG00000103202)	16	396,725 - 410,367 on strand +	NME/NM23 nucleoside diphosphate kinase 4
	DECR2 (ENSG00000242612)	16	401,826 - 412,487 on strand +	2,4-dienoyl-CoA reductase 2, peroxisomal
	RAB11FIP3 (ENSG00000090565)	16	425,619 - 523,011 on strand +	RAB11 family interacting protein 3
	CAPN15 (ENSG00000103326)	16	527,717 - 554,636 on strand +	calpain 15
	PRR35 (ENSG00000161992)	16	560,422 - 565,528 on strand +	proline rich 35
	PIGQ (ENSG00000007541)	16	566,995 - 584,136 on strand +	phosphatidylinositol glycan anchor biosynthesis class Q
	NHLRC4 (ENSG00000257108)	16	566,996 - 569,495 on strand +	NHL repeat containing 4
	RAB40C (ENSG00000197562)	16	589,357 - 629,272 on strand +	RAB40C, member RAS oncogene family
	WFIKKN1 (ENSG00000127578)	16	629,239 - 634,116 on strand +	WAP, follistatin/kazal, immunoglobulin, kunitz and netrin domain containing 1
	METTL26 (ENSG00000130731)	16	634,427 - 636,366 on strand -	methyltransferase like 26
	MCRIP2 (ENSG00000172366)	16	636,817 - 648,474 on strand +	MAPK regulated corepressor interacting protein 2
	WDR90 (ENSG00000161996)	16	649,311 - 667,833 on strand +	WD repeat domain 90
	Orangotan
		Chromossome
	POLR3K (ENSPPYG00000006893)	16	24,869 - 30,393 on strand -	RNA polymerase III subunit K
	SNRNP25 (ENSPPYG00000006894)	16	29,816 - 34,490 on strand +	small nuclear ribonucleoprotein U11/U12 subunit 25
	RHBDF1 (ENSPPYG00000006895)	16	32,008 - 49,854 on strand -	rhomboid 5 homolog 1
	MPG (ENSPPYG00000006896)	16	54,598 - 67,729 on strand +	N-methylpurine DNA glycosylase
	NPRL3 (ENSPPYG00000006897)	16	66,730 - 123,114 on strand -	NPR3 like, GATOR1 complex subunit
	HBM (ENSPPYG00000006898)	16	152,493 - 153,258 on strand +	hemoglobin subunit mu
	ENSPPYG00000006899	16	166,789 - 167,660 on strand +
	HBQ1 (ENSPPYG00000006900)	16	170,735 - 172,577 on strand +	hemoglobin subunit theta 1
	LUC7L (ENSPPYG00000006901)	16	182,815 - 221,546 on strand -	LUC7 like
	ENSPPYG00000006902	16	244,481 - 266,399 on strand +
	RGS11 (ENSPPYG00000006903)	16	266,816 - 273,306 on strand -	regulator of G-protein signaling 11
	ARHGDIG (ENSPPYG00000029691)	16	279,977 - 281,989 on strand +	Rho GDP dissociation inhibitor gamma
	PDIA2 (ENSPPYG00000006904)	16	282,255 - 286,327 on strand +	Pongo abelii protein disulfide isomerase family A, member 2 (PDIA2), mRNA
	AXIN1 (ENSPPYG00000006905)	16	286,554 - 352,831 on strand -	axin 1
	MRPL28 (ENSPPYG00000006906)	16	374,616 - 377,678 on strand -	mitochondrial ribosomal protein L28
	TMEM8A (ENSPPYG00000006907)	16	380,378 - 389,456 on strand -	transmembrane protein 8A
	NME4 (ENSPPYG00000006908)	16	404,377 - 408,407 on strand +	NME/NM23 nucleoside diphosphate kinase 4
	DECR2 (ENSPPYG00000006909)	16	409,934 - 419,561 on strand +	peroxisomal 2,4-dienoyl-CoA reductase
	RAB11FIP3 (ENSPPYG00000006910)	16	471,033 - 535,729 on strand +	RAB11 family interacting protein 3
	CAPN15 (ENSPPYG00000006911)	16	542,963 - 568,190 on strand +	calpain 15
	PRR35 (ENSPPYG00000006912)	16	580,609 - 587,955 on strand +	proline rich 35
	PIGQ (ENSPPYG00000006913)	16	594,025 - 602,749 on strand +	phosphatidylinositol glycan anchor biosynthesis class Q
	RAB40C (ENSPPYG00000006914)	16	609,482 - 646,095 on strand +	RAB40C, member RAS oncogene family
	WFIKKN1 (ENSPPYG00000006915)	16	649,379 - 653,446 on strand +	WAP, follistatin/kazal, immunoglobulin, kunitz and netrin domain containing 1
	METTL26 (ENSPPYG00000006916)	16	653,916 - 655,642 on strand -	methyltransferase like 26
	ENSPPYG00000006917	16	663,617 - 673,055 on strand +
	WDR90 (ENSPPYG00000006918)	16	674,220 - 692,305 on strand +	WD repeat domain 90
	RHOT2 (ENSPPYG00000006919)	16	692,890 - 698,764 on strand +	ras homolog family member T2
	Rhesus
		Chromossome
	POLR3K (ENSMMUG00000000586)	20	1,963 - 9,740 on strand -	RNA polymerase III subunit K
	SNRNP25 (ENSMMUG00000047475)	20	9,125 - 13,649 on strand +	small nuclear ribonucleoprotein U11/U12 subunit 25
	RHBDF1 (ENSMMUG00000000588)	20	14,337 - 21,292 on strand -	rhomboid 5 homolog 1
	MPG (ENSMMUG00000000589)	20	34,806 - 42,003 on strand +	N-methylpurine DNA glycosylase
	NPRL3 (ENSMMUG00000000590)	20	41,927 - 99,386 on strand -	NPR3 like, GATOR1 complex subunit
	HBZ (ENSMMUG00000019566)	20	114,955 - 116,554 on strand +	hemoglobin subunit zeta
	HBA2 (ENSMMUG00000029310)	20	133,491 - 136,026 on strand +
	ENSMMUG00000042961	20	137,247 - 141,825 on strand +
	LUC7L (ENSMMUG00000000596)	20	149,014 - 197,495 on strand -	LUC7 like
	FAM234A (ENSMMUG00000000599)	20	226,629 - 250,202 on strand +	protein ITFG3
	RGS11 (ENSMMUG00000000602)	20	249,755 - 258,474 on strand -	regulator of G-protein signaling 11
	ARHGDIG (ENSMMUG00000000603)	20	267,625 - 268,924 on strand +	Rho GDP dissociation inhibitor gamma
	PDIA2 (ENSMMUG00000000604)	20	269,258 - 273,108 on strand +	protein disulfide-isomerase A2 precursor
	AXIN1 (ENSMMUG00000000605)	20	272,264 - 335,687 on strand -	axin 1
	MRPL28 (ENSMMUG00000000609)	20	353,731 - 357,278 on strand -	mitochondrial ribosomal protein L28
	ENSMMUG00000039374	20	354,002 - 356,206 on strand -
	TMEM8A (ENSMMUG00000000610)	20	357,462 - 364,396 on strand -	transmembrane protein 8A
	NME4 (ENSMMUG00000000612)	20	380,680 - 383,914 on strand +	nucleoside diphosphate kinase, mitochondrial
	DECR2 (ENSMMUG00000008522)	20	385,336 - 398,998 on strand +	2,4-dienoyl-CoA reductase 2, peroxisomal
	RAB11FIP3 (ENSMMUG00000000613)	20	404,742 - 505,951 on strand +	RAB11 family interacting protein 3
	CAPN15 (ENSMMUG00000000615)	20	516,477 - 539,228 on strand +	calpain 15
	NHLRC4 (ENSMMUG00000000616)	20	551,312 - 554,288 on strand +	NHL repeat containing 4
	PIGQ (ENSMMUG00000029296)	20	555,451 - 568,250 on strand +	phosphatidylinositol glycan anchor biosynthesis class Q
	RAB40C (ENSMMUG00000038629)	20	573,622 - 615,394 on strand +	RAB40C, member RAS oncogene family
	WFIKKN1 (ENSMMUG00000021967)	20	615,027 - 618,279 on strand +	WAP, follistatin/kazal, immunoglobulin, kunitz and netrin domain containing 1
	C20H16orf13 (ENSMMUG00000021968)	20	618,686 - 620,349 on strand -	UPF0585 protein C16orf13
	ENSMMUG00000041708	20	629,854 - 633,367 on strand +
	WDR90 (ENSMMUG00000013169)	20	636,262 - 654,568 on strand +	WD repeat domain 90
	Mouse
		Chromossome
	Cuta (ENSMUSG00000024194)	17	26,937,973 - 26,939,478 on strand -	cutA divalent cation tolerance homolog
	Phf1 (ENSMUSG00000024193)	17	26,933,127 - 26,937,890 on strand +	PHD finger protein 1
	Kifc5b (ENSMUSG00000024301)	17	26,917,091 - 26,932,579 on strand +	kinesin family member C5B
	Nkx2-5 (ENSMUSG00000015579)	17	26,838,664 - 26,841,565 on strand -	NK2 homeobox 5
	Bnip1 (ENSMUSG00000024191)	17	26,781,079 - 26,792,565 on strand +	BCL2/adenovirus E1B interacting protein 1
	Crebrf (ENSMUSG00000048249)	17	26,715,650 - 26,776,635 on strand +	CREB3 regulatory factor
	Atp6v0e (ENSMUSG00000015575)	17	26,676,396 - 26,699,644 on strand +	ATPase, H+ transporting, lysosomal V0 subunit E
	Ergic1 (ENSMUSG00000001576)	17	26,561,489 - 26,656,931 on strand +	endoplasmic reticulum-golgi intermediate compartment (ERGIC) 1
	Gm8225 (ENSMUSG00000068604)	17	26,542,760 - 26,543,715 on strand +	predicted gene 8225
	Dusp1 (ENSMUSG00000024190)	17	26,505,590 - 26,508,519 on strand -	dual specificity phosphatase 1
	Neurl1b (ENSMUSG00000034413)	17	26,414,829 - 26,446,349 on strand +	neuralized E3 ubiquitin protein ligase 1B
	Luc7l (ENSMUSG00000024188)	17	26,252,910 - 26,285,504 on strand +	Luc7-like
	Fam234a (ENSMUSG00000024187)	17	26,211,822 - 26,244,223 on strand -	family with sequence similarity 234, member A
	Rgs11 (ENSMUSG00000024186)	17	26,202,951 - 26,211,324 on strand +	regulator of G-protein signaling 11
	Arhgdig (ENSMUSG00000073433)	17	26,196,226 - 26,207,786 on strand -	Rho GDP dissociation inhibitor (GDI) gamma
	Pdia2 (ENSMUSG00000024184)	17	26,195,999 - 26,199,087 on strand -	protein disulfide isomerase associated 2
	Axin1 (ENSMUSG00000024182)	17	26,138,688 - 26,195,811 on strand +	axin 1
	Mrpl28 (ENSMUSG00000024181)	17	26,123,520 - 26,126,613 on strand +	mitochondrial ribosomal protein L28
	Tmem8 (ENSMUSG00000024180)	17	26,113,316 - 26,123,254 on strand +	transmembrane protein 8
	Gm8186 (ENSMUSG00000049124)	17	26,098,872 - 26,099,257 on strand -	predicted gene 8186
	Nme4 (ENSMUSG00000024177)	17	26,091,734 - 26,095,508 on strand -	NME/NM23 nucleoside diphosphate kinase 4
	Decr2 (ENSMUSG00000036775)	17	26,081,211 - 26,090,329 on strand -	2-4-dienoyl-Coenzyme A reductase 2, peroxisomal
	Rab11fip3 (ENSMUSG00000037098)	17	25,989,036 - 26,069,409 on strand -	RAB11 family interacting protein 3 (class II)
	Capn15 (ENSMUSG00000037326)	17	25,958,364 - 25,985,796 on strand -	calpain 15
	D630044L22Rik (ENSMUSG00000097405)	17	25,951,472 - 25,963,610 on strand +	RIKEN cDNA gene D630044L22 gene
	A930017K11Rik (ENSMUSG00000025727)	17	25,946,387 - 25,952,565 on strand -	RIKEN cDNA A930017K11 gene
	Nhlrc4 (ENSMUSG00000090113)	17	25,942,233 - 25,944,961 on strand -	NHL repeat containing 4
	Pigq (ENSMUSG00000025728)	17	25,926,421 - 25,944,510 on strand -	phosphatidylinositol glycan anchor biosynthesis, class Q
	Rab40c (ENSMUSG00000025730)	17	25,882,114 - 25,919,727 on strand -	Rab40C, member RAS oncogene family
	Wfikkn1 (ENSMUSG00000071192)	17	25,877,630 - 25,880,305 on strand -	WAP, FS, Ig, KU, and NTR-containing protein 1
	Mettl26 (ENSMUSG00000025731)	17	25,875,464 - 25,886,007 on strand +	methyltransferase like 26
	Guinea pig
		Chromossome
	ENSCPOG00000027439	scaffold_4	19,985,883 - 19,986,291 on strand +
	ENSCPOG00000001658	scaffold_4	20,007,934 - 20,026,683 on strand +
	ENSCPOG00000006580	scaffold_4	20,036,055 - 20,036,711 on strand -
	IL9R (ENSCPOG00000026125)	scaffold_4	20,053,493 - 20,061,981 on strand -	interleukin 9 receptor
	POLR3K (ENSCPOG00000006281)	scaffold_4	20,073,527 - 20,075,821 on strand -	RNA polymerase III subunit K
	SNRNP25 (ENSCPOG00000006282)	scaffold_4	20,076,039 - 20,078,575 on strand +	small nuclear ribonucleoprotein U11/U12 subunit 25
	RHBDF1 (ENSCPOG00000006289)	scaffold_4	20,079,899 - 20,086,911 on strand -	rhomboid 5 homolog 1
	MPG (ENSCPOG00000010312)	scaffold_4	20,102,344 - 20,107,792 on strand +	N-methylpurine DNA glycosylase
	NPRL3 (ENSCPOG00000001587)	scaffold_4	20,108,617 - 20,154,298 on strand -	NPR3 like, GATOR1 complex subunit
	ENSCPOG00000000267	scaffold_4	20,169,103 - 20,169,845 on strand +	Hemoglobin subunit alpha
	HBQ1 (ENSCPOG00000027187)	scaffold_4	20,172,300 - 20,172,932 on strand +	hemoglobin subunit theta 1
	LUC7L (ENSCPOG00000014095)	scaffold_4	20,183,124 - 20,210,836 on strand -	LUC7 like
	ENSCPOG00000011450	scaffold_4	20,246,733 - 20,256,579 on strand +
	RGS11 (ENSCPOG00000011460)	scaffold_4	20,259,577 - 20,266,326 on strand -	regulator of G-protein signaling 11
	ARHGDIG (ENSCPOG00000024274)	scaffold_4	20,268,877 - 20,270,627 on strand +	Rho GDP dissociation inhibitor gamma
	PDIA2 (ENSCPOG00000011244)	scaffold_4	20,270,922 - 20,274,220 on strand +	protein disulfide isomerase family A member 2
	AXIN1 (ENSCPOG00000011250)	scaffold_4	20,275,196 - 20,321,934 on strand -	axin 1
	MRPL28 (ENSCPOG00000007176)	scaffold_4	20,336,365 - 20,339,800 on strand -	mitochondrial ribosomal protein L28
	TMEM8A (ENSCPOG00000007180)	scaffold_4	20,341,378 - 20,350,073 on strand -	transmembrane protein 8A
	NME4 (ENSCPOG00000006496)	scaffold_4	20,361,294 - 20,364,242 on strand +	NME/NM23 nucleoside diphosphate kinase 4
	DECR2 (ENSCPOG00000006499)	scaffold_4	20,365,817 - 20,372,034 on strand +	2,4-dienoyl-CoA reductase 2, peroxisomal
	ENSCPOG00000019433	scaffold_4	20,413,757 - 20,415,067 on strand +
	ENSCPOG00000008515	scaffold_4	20,477,345 - 20,501,475 on strand +
	CAPN15 (ENSCPOG00000022357)	scaffold_4	20,524,401 - 20,529,806 on strand +	calpain 15
	NHLRC4 (ENSCPOG00000021016)	scaffold_4	20,544,141 - 20,544,551 on strand +	NHL repeat containing 4
	PIGQ (ENSCPOG00000026583)	scaffold_4	20,550,337 - 20,559,907 on strand +	phosphatidylinositol glycan anchor biosynthesis class Q
	RAB40C (ENSCPOG00000023164)	scaffold_4	20,566,004 - 20,602,355 on strand +	RAB40C, member RAS oncogene family
	WFIKKN1 (ENSCPOG00000025782)	scaffold_4	20,606,041 - 20,608,433 on strand +	WAP, follistatin/kazal, immunoglobulin, kunitz and netrin domain containing 1
	METTL26 (ENSCPOG00000002381)	scaffold_4	20,609,007 - 20,610,152 on strand -	methyltransferase like 26
	MCRIP2 (ENSCPOG00000002382)	scaffold_4	20,623,032 - 20,627,878 on strand +	MAPK regulated corepressor interacting protein 2
	WDR90 (ENSCPOG00000002385)	scaffold_4	20,629,546 - 20,646,750 on strand +	WD repeat domain 90
	Dog
		Chromossome
	SNRNP25 (ENSCAFG00000032338)	6	40,410,592 - 40,416,970 on strand -	small nuclear ribonucleoprotein U11/U12 subunit 25
	ENSCAFG00000028465	6	40,398,733 - 40,399,641 on strand -
	RHBDF1 (ENSCAFG00000019703)	6	40,396,111 - 40,413,358 on strand +	rhomboid 5 homolog 1
	MPG (ENSCAFG00000019700)	6	40,389,096 - 40,394,808 on strand -	N-methylpurine DNA glycosylase
	ENSCAFG00000024468	6	40,377,079 - 40,377,873 on strand -
	NPRL3 (ENSCAFG00000019696)	6	40,352,963 - 40,389,489 on strand +	NPR3 like, GATOR1 complex subunit
	ENSCAFG00000028569	6	40,342,562 - 40,343,504 on strand -
	ENSCAFG00000031055	6	40,331,793 - 40,332,696 on strand -
	HBM (ENSCAFG00000029224)	6	40,330,683 - 40,332,438 on strand -	hemoglobin subunit mu
	ENSCAFG00000029904	6	40,326,459 - 40,329,857 on strand -
	ENSCAFG00000032615	6	40,324,263 - 40,326,351 on strand -
	LUC7L (ENSCAFG00000019689)	6	40,274,402 - 40,309,875 on strand +	LUC7 like
	ENSCAFG00000019687	6	40,235,627 - 40,271,910 on strand -
	RGS11 (ENSCAFG00000023874)	6	40,225,981 - 40,233,303 on strand +	regulator of G-protein signaling 11
	ARHGDIG (ENSCAFG00000015363)	6	40,222,103 - 40,223,076 on strand -	Rho GDP dissociation inhibitor gamma
	PDIA2 (ENSCAFG00000015429)	6	40,218,664 - 40,221,797 on strand -	protein disulfide isomerase family A member 2
	AXIN1 (ENSCAFG00000019684)	6	40,158,250 - 40,218,389 on strand +	axin 1
	MRPL28 (ENSCAFG00000019682)	6	40,145,876 - 40,147,777 on strand +	mitochondrial ribosomal protein L28
	TMEM8A (ENSCAFG00000019680)	6	40,137,825 - 40,145,809 on strand +	transmembrane protein 8A
	ENSCAFG00000032180	6	40,122,402 - 40,122,998 on strand +
	ENSCAFG00000019677	6	40,119,854 - 40,122,431 on strand -
	DECR2 (ENSCAFG00000019675)	6	40,111,234 - 40,115,713 on strand -	2,4-dienoyl-CoA reductase 2, peroxisomal
	ENSCAFG00000019670	6	40,020,485 - 40,044,291 on strand -
	CAPN15 (ENSCAFG00000019667)	6	39,996,589 - 40,003,460 on strand -	calpain 15
	PRR35 (ENSCAFG00000019663)	6	39,986,374 - 39,988,629 on strand -	proline rich 35
	NHLRC4 (ENSCAFG00000032733)	6	39,984,087 - 39,984,494 on strand -	NHL repeat containing 4
	ENSCAFG00000019662	6	39,971,032 - 39,982,408 on strand -
	WFIKKN1 (ENSCAFG00000019660)	6	39,934,171 - 39,936,406 on strand -	WAP, follistatin/kazal, immunoglobulin, kunitz and netrin domain containing 1
	ENSCAFG00000030159	6	39,922,253 - 39,922,650 on strand -
	WDR90 (ENSCAFG00000019654)	6	39,905,866 - 39,922,320 on strand -	WD repeat domain 90
	METTL26 (ENSCAFG00000019655)	6	39,901,632 - 39,933,773 on strand +	methyltransferase like 26
	Megabat
		Chromossome
	POLR3K (ENSPVAG00000000530)	GeneScaffold_2552	7,446 - 10,206 on strand -	RNA polymerase III subunit K
	ENSPVAG00000000531	GeneScaffold_2552	10,205 - 13,220 on strand +
	RHBDF1 (ENSPVAG00000000532)	GeneScaffold_2552	14,296 - 20,294 on strand -	rhomboid 5 homolog 1
	MPG (ENSPVAG00000000533)	GeneScaffold_2552	36,233 - 42,531 on strand +	N-methylpurine DNA glycosylase
	NPRL3 (ENSPVAG00000000534)	GeneScaffold_2552	44,481 - 78,006 on strand -	NPR3 like, GATOR1 complex subunit
	ENSPVAG00000000535	GeneScaffold_2552	85,059 - 86,128 on strand +
	ENSPVAG00000000536	GeneScaffold_2552	95,178 - 96,870 on strand +
	HBM (ENSPVAG00000000537)	GeneScaffold_2552	97,642 - 98,347 on strand +	hemoglobin subunit mu
	ENSPVAG00000000538	GeneScaffold_2552	100,048 - 100,851 on strand +
	ENSPVAG00000000539	GeneScaffold_2552	104,257 - 105,060 on strand +
	HBQ1 (ENSPVAG00000000540)	GeneScaffold_2552	107,148 - 107,807 on strand +	hemoglobin subunit theta 1
	LUC7L (ENSPVAG00000000541)	GeneScaffold_2552	118,633 - 146,648 on strand -	LUC7 like
	ENSPVAG00000000543	GeneScaffold_2552	165,344 - 171,592 on strand +
	RGS11 (ENSPVAG00000000545)	GeneScaffold_2552	174,627 - 183,452 on strand -	regulator of G-protein signaling 11
	ARHGDIG (ENSPVAG00000000546)	GeneScaffold_2552	186,513 - 188,474 on strand +	Rho GDP dissociation inhibitor gamma
	PDIA2 (ENSPVAG00000000547)	GeneScaffold_2552	188,842 - 192,205 on strand +	protein disulfide isomerase family A member 2
	AXIN1 (ENSPVAG00000000549)	GeneScaffold_2552	193,399 - 242,360 on strand -	axin 1
	MRPL28 (ENSPVAG00000000551)	GeneScaffold_2552	258,505 - 261,311 on strand -	mitochondrial ribosomal protein L28
	TMEM8A (ENSPVAG00000000552)	GeneScaffold_2552	262,993 - 271,383 on strand -	transmembrane protein 8A
	NME4 (ENSPVAG00000000554)	GeneScaffold_2552	277,033 - 280,037 on strand +	NME/NM23 nucleoside diphosphate kinase 4
	DECR2 (ENSPVAG00000000556)	GeneScaffold_2552	281,751 - 285,962 on strand +	2,4-dienoyl-CoA reductase 2, peroxisomal
	RAB11FIP3 (ENSPVAG00000000557)	GeneScaffold_2552	332,250 - 366,298 on strand +	RAB11 family interacting protein 3
	CAPN15 (ENSPVAG00000000559)	GeneScaffold_2552	389,699 - 396,202 on strand +	calpain 15
	PRR35 (ENSPVAG00000000560)	GeneScaffold_2552	406,714 - 411,913 on strand +	proline rich 35
	PIGQ (ENSPVAG00000000561)	GeneScaffold_2552	417,251 - 428,993 on strand +	phosphatidylinositol glycan anchor biosynthesis class Q
	RAB40C (ENSPVAG00000000563)	GeneScaffold_2552	434,547 - 459,344 on strand +	RAB40C, member RAS oncogene family
	WFIKKN1 (ENSPVAG00000000564)	GeneScaffold_2552	461,451 - 463,766 on strand +	WAP, follistatin/kazal, immunoglobulin, kunitz and netrin domain containing 1
	METTL26 (ENSPVAG00000000565)	GeneScaffold_2552	465,408 - 466,195 on strand -	methyltransferase like 26
	Microbat
		Chromossome
	ENSMLUG00000023926	GL430265	609,988 - 618,824 on strand +	Uncharacterized protein
	HBZ (ENSMLUG00000026396)	GL430265	583,418 - 590,035 on strand -	hemoglobin subunit zeta
	ENSMLUG00000027635	GL430265	578,935 - 579,762 on strand -	Uncharacterized protein
	ENSMLUG00000027489	GL430265	574,225 - 575,054 on strand -	Uncharacterized protein
	ENSMLUG00000028677	GL430265	568,903 - 569,823 on strand +
	HBQ1 (ENSMLUG00000025171)	GL430265	568,050 - 568,504 on strand -	hemoglobin subunit theta 1
	ENSMLUG00000012452	GL430265	563,105 - 564,025 on strand +	Uncharacterized protein
	LUC7L (ENSMLUG00000017341)	GL430265	516,970 - 547,782 on strand +	LUC7 like
	ENSMLUG00000010480	GL430265	482,938 - 492,693 on strand -	Uncharacterized protein
	RGS11 (ENSMLUG00000010526)	GL430265	472,499 - 480,186 on strand +	regulator of G-protein signaling 11
	ARHGDIG (ENSMLUG00000009896)	GL430265	463,320 - 466,147 on strand -	Rho GDP dissociation inhibitor gamma
	PDIA2 (ENSMLUG00000009910)	GL430265	459,522 - 462,944 on strand -	protein disulfide isomerase family A member 2
	AXIN1 (ENSMLUG00000009934)	GL430265	386,990 - 458,353 on strand +	axin 1
	MRPL28 (ENSMLUG00000010009)	GL430265	367,977 - 370,624 on strand +	mitochondrial ribosomal protein L28
	ENSMLUG00000010029	GL430265	359,793 - 366,109 on strand +	Uncharacterized protein
	ENSMLUG00000010061	GL430265	344,038 - 347,008 on strand -	Nucleoside diphosphate kinase
	DECR2 (ENSMLUG00000010075)		336,665 - 341,648 on strand -	2,4-dienoyl-CoA reductase 2, peroxisomal
	ENSMLUG00000023907		287,187 - 287,426 on strand +
	ENSMLUG00000010103		225,489 - 250,419 on strand -
	CAPN15 (ENSMLUG00000010159)		193,294 - 199,314 on strand -	calpain 15
	PRR35 (ENSMLUG00000013444)		180,544 - 182,541 on strand -	proline rich 35
	NHLRC4 (ENSMLUG00000029944)		177,178 - 177,700 on strand -	NHL repeat containing 4
	PIGQ (ENSMLUG00000010203)		161,222 - 171,847 on strand -	phosphatidylinositol glycan anchor biosynthesis class Q
	RAB40C (ENSMLUG00000010258)		123,081 - 153,878 on strand -	RAB40C, member RAS oncogene family
	WFIKKN1 (ENSMLUG00000010278)		118,087 - 120,339 on strand -	WAP, follistatin/kazal, immunoglobulin, kunitz and netrin domain containing 1
	METTL26 (ENSMLUG00000007016)		115,972 - 117,395 on strand +	methyltransferase like 26
	MCRIP2 (ENSMLUG00000024694)		98,783 - 99,559 on strand -	MAPK regulated corepressor interacting protein 2
	Opossum
		Chromossome
	ENSMODG00000016602	6	148,962,149 - 148,968,371 on strand +	Uncharacterized protein
	IL9R (ENSMODG00000028058)	6	149,028,840 - 149,064,902 on strand -	interleukin 9 receptor
	RHBDF1 (ENSMODG00000016619)	6	149,094,853 - 149,132,408 on strand -	rhomboid 5 homolog 1
	SNRNP25 (ENSMODG00000016609)	6	149,109,226 - 149,112,978 on strand +	small nuclear ribonucleoprotein U11/U12 subunit 25
	MPG (ENSMODG00000016624)	6	149,149,519 - 149,280,055 on strand +	N-methylpurine DNA glycosylase
	NPRL3 (ENSMODG00000016627)	6	149,278,880 - 149,352,922 on strand -	NPR3 like, GATOR1 complex subunit
	HBA (ENSMODG00000016635)	6	149,372,272 - 149,425,873 on strand +	hemoglobin subunit alpha
	ENSMODG00000024539	6	149,374,307 - 149,398,530 on strand -	Uncharacterized protein
	ENSMODG00000016631	6	149,396,422 - 149,399,266 on strand +	Uncharacterized protein
	HBQ1 (ENSMODG00000016633)	6	149,404,705 - 149,406,733 on strand +	hemoglobin subunit theta 1
	ENSMODG00000016637	6	149,445,798 - 149,447,414 on strand +	Uncharacterized protein
	LUC7L (ENSMODG00000016644)	6	149,455,517 - 149,500,131 on strand -	LUC7 like
	ENSMODG00000016651	6	149,542,774 - 149,634,493 on strand +	Uncharacterized protein
	RGS11 (ENSMODG00000016655)	6	149,636,861 - 149,659,608 on strand -	regulator of G-protein signaling 11
	ARHGDIG (ENSMODG00000016657)	6	149,675,108 - 149,695,843 on strand +	Rho GDP dissociation inhibitor gamma
	PDIA2 (ENSMODG00000016662)	6	149,695,932 - 149,706,294 on strand +	protein disulfide isomerase family A member 2
	AXIN1 (ENSMODG00000016665)	6	149,708,115 - 149,897,336 on strand -	axin 1
	MRPL28 (ENSMODG00000016666)	6	149,959,692 - 149,966,747 on strand -	mitochondrial ribosomal protein L28
	ENSMODG00000016669	6	149,972,847 - 149,994,419 on strand -
	NME4 (ENSMODG00000016672)	6	150,025,911 - 150,041,989 on strand +	NME/NM23 nucleoside diphosphate kinase 4
	DECR2 (ENSMODG00000016674)	6	150,084,790 - 150,122,508 on strand +	2,4-dienoyl-CoA reductase 2, peroxisomal
	RAB11FIP3 (ENSMODG00000016678)		150,258,839 - 150,344,169 on strand +	RAB11 family interacting protein 3
	CAPN15 (ENSMODG00000016682)		150,406,352 - 150,482,271 on strand +	calpain 15
	ENSMODG00000027467		150,525,893 - 150,526,903 on strand -	Uncharacterized protein
	ENSMODG00000016686		150,551,668 - 150,571,577 on strand +
	PIGQ (ENSMODG00000016688)		150,576,215 - 150,633,368 on strand +	phosphatidylinositol glycan anchor biosynthesis class Q
	RAB40C (ENSMODG00000016700)		150,666,230 - 150,769,808 on strand +	RAB40C, member RAS oncogene family
	WFIKKN1 (ENSMODG00000016704)		150,774,802 - 150,779,739 on strand +	WAP, follistatin/kazal, immunoglobulin, kunitz and netrin domain containing 1
	METTL26 (ENSMODG00000016707)		150,780,119 - 150,786,630 on strand -	methyltransferase like 26
	MCRIP2 (ENSMODG00000016708)		150,838,586 - 150,867,385 on strand +	MAPK regulated corepressor interacting protein 2
	WDR90 (ENSMODG00000024523)		150,876,065 - 150,930,858 on strand +	WD repeat domain 90
	Chicken
		Chromossome
	ENSGALG00000035115	14	12,456,914 - 12,459,658 on strand -
	ENSGALG00000029737	14	12,454,648 - 12,455,037 on strand -
	UBALD1 (ENSGALG00000007619)	14	12,450,125 - 12,455,760 on strand +	UBA like domain containing 1
	MGRN1 (ENSGALG00000037492)	14	12,399,639 - 12,448,114 on strand -	mahogunin ring finger 1
	SDOS (ENSGALG00000039779)	14	12,396,961 - 12,399,421 on strand -	Protein syndesmos
	ENSGALG00000042322	14	12,387,144 - 12,392,905 on strand +
	C7orf26 (ENSGALG00000034380)	14	12,372,238 - 12,379,190 on strand +	chromosome 7 open reading frame 26
	DNASE1 (ENSGALG00000041066)	14	12,367,583 - 12,371,618 on strand -	Gallus gallus deoxyribonuclease I (DNASE1), mRNA.
	ECI1 (ENSGALG00000031563)	14	12,356,793 - 12,361,719 on strand +	Gallus gallus enoyl-CoA delta isomerase 1 (ECI1), mRNA.
	CLCN7 (ENSGALG00000030826)	14	12,338,071 - 12,354,779 on strand -	Gallus gallus chloride channel, voltage-sensitive 7 (CLCN7), mRNA.
	ENSGALG00000032279	14	12,336,513 - 12,337,262 on strand +
	LUC7L (ENSGALG00000037983)	14	12,317,805 - 12,324,721 on strand -	LUC7 like
	ENSGALG00000031303	14	12,295,364 - 12,314,108 on strand -
	RGS11 (ENSGALG00000040648)	14	12,289,815 - 12,294,043 on strand +	regulator of G-protein signaling 11
	ARHGDIG (ENSGALG00000036819)	14	12,286,477 - 12,288,978 on strand -	Rho GDP dissociation inhibitor gamma
	PDIA2 (ENSGALG00000040070)	14	12,282,289 - 12,286,205 on strand -	protein disulfide isomerase family A member 2
	AXIN1 (ENSGALG00000029402)	14	12,212,109 - 12,280,905 on strand +	Gallus gallus axin 1 (AXIN1), mRNA.
	MRPL28 (ENSGALG00000007473)	14	12,187,984 - 12,191,132 on strand +	Gallus gallus mitochondrial ribosomal protein L28
	ENSGALG00000026188	14	12,176,496 - 12,188,297 on strand +	Gallus gallus hemoglobin, alpha 1 (HBAA), mRNA
	HBAA (ENSGALG00000043234)	14	12,163,617 - 12,164,434 on strand +	Gallus gallus hemoglobin, alpha 1
	HBAD (ENSGALG00000031597)	14	12,160,597 - 12,161,521 on strand +	Hemoglobin subunit alpha-D
	ENSGALG00000032560	14	12,157,827 - 12,158,420 on strand -
	HBZ (ENSGALG00000023740)	14	12,156,905 - 12,158,534 on strand +	Hemoglobin subunit pi
	NPRL3 (ENSGALG00000007456)	14	12,111,199 - 12,152,564 on strand -	NPR3 like, GATOR1 complex subunit
	MPG (ENSGALG00000028691)	14	12,094,813 - 12,108,296 on strand +	N-methylpurine DNA glycosylase
	RHBDF1 (ENSGALG00000007434)	14	12,040,976 - 12,061,073 on strand -	rhomboid 5 homolog 1
	SNRNP25 (ENSGALG00000026559)	14	12,037,989 - 12,040,508 on strand +	small nuclear ribonucleoprotein U11/U12 subunit 25
	POLR3K (ENSGALG00000017681)	14	12,037,480 - 12,037,963 on strand -	RNA polymerase III subunit K
	GTF3C1 (ENSGALG00000007387)	14	11,999,148 - 12,037,184 on strand +	general transcription factor IIIC subunit 1
	KIAA0556 (ENSGALG00000043363)	14	11,946,755 - 11,997,989 on strand -	KIAA0556
	GSG1L (ENSGALG00000013170)		11,877,677 - 11,925,754 on strand +	GSG1 like
	turkey
	TRAP1 (ENSMGAG00000009239)	16	13,034,810 - 13,050,855 on strand -	TNF receptor associated protein 1
	SLX4 (ENSMGAG00000009212)	16	13,000,306 - 13,020,527 on strand -	SLX4 structure-specific endonuclease subunit
	ENSMGAG00000009203	16	12,985,244 - 12,988,702 on strand -
	CDIP1 (ENSMGAG00000009193)	16	12,969,974 - 12,975,474 on strand +	cell death inducing p53 target 1
	ENSMGAG00000009188	16	12,961,534 - 12,964,139 on strand -
	MGRN1 (ENSMGAG00000009163)	16	12,907,499 - 12,947,691 on strand -	mahogunin ring finger 1
	NAA60 (ENSMGAG00000009159)	16	12,896,710 - 12,902,560 on strand +	N(alpha)-acetyltransferase 60, NatF catalytic subunit
	C7orf26 (ENSMGAG00000009153)	16	12,861,699 - 12,867,678 on strand +	chromosome 7 open reading frame 26
	DNASE1L2 (ENSMGAG00000009109)	16	12,851,427 - 12,861,012 on strand -	deoxyribonuclease 1 like 2
	ECI1 (ENSMGAG00000009080)	16	12,846,971 - 12,851,175 on strand +	enoyl-CoA delta isomerase 1
	PTX4 (ENSMGAG00000009077)	16	12,842,526 - 12,844,085 on strand -	pentraxin 4
	CLCN7 (ENSMGAG00000008986)	16	12,824,379 - 12,973,431 on strand -	chloride voltage-gated channel 7
	LUC7L (ENSMGAG00000008960)	16	12,800,959 - 12,815,911 on strand -	LUC7 like
	ENSMGAG00000008900	16	12,764,768 - 12,794,634 on strand -	Uncharacterized protein
	RGS11 (ENSMGAG00000008871)	16	12,757,369 - 12,761,222 on strand +	regulator of G-protein signaling 11
	PDIA2 (ENSMGAG00000008956)	16	12,755,108 - 12,775,200 on strand -	protein disulfide isomerase family A member 2
	AXIN1 (ENSMGAG00000008924)	16	12,686,109 - 12,752,845 on strand +	axin 1
	ARHGDIG (ENSMGAG00000008858)	16	12,683,286 - 12,684,980 on strand -	Rho GDP dissociation inhibitor gamma
	ENSMGAG00000008848	16	12,659,029 - 12,661,321 on strand +
	ENSMGAG00000008833	16	12,645,007 - 12,655,503 on strand +	Uncharacterized protein
	HBM (ENSMGAG00000008803)	16	12,629,075 - 12,629,931 on strand +	hemoglobin subunit mu
	HBZ (ENSMGAG00000008793)	16	12,622,730 - 12,624,375 on strand +	hemoglobin subunit zeta
	NPRL3 (ENSMGAG00000008762)	16	12,579,248 - 12,617,013 on strand -	NPR3 like, GATOR1 complex subunit
	MPG (ENSMGAG00000008758)	16	12,568,750 - 12,576,380 on strand +	N-methylpurine DNA glycosylase
	RHBDF1 (ENSMGAG00000008719)	16	12,506,627 - 12,535,486 on strand -	rhomboid 5 homolog 1
	ENSMGAG00000016362	16	12,498,026 - 12,502,182 on strand +	Uncharacterized protein
	ENSMGAG00000008640	16	12,463,556 - 12,487,654 on strand +	Uncharacterized protein
	KIAA0556 (ENSMGAG00000008690)	16	12,409,067 - 12,462,205 on strand -	KIAA0556
	GSG1L (ENSMGAG00000008627)	16	12,340,480 - 12,382,138 on strand +	GSG1 like
	IL20RB (ENSMGAG00000008620)	16	12,318,332 - 12,325,901 on strand +	interleukin 20 receptor subunit beta
	Chinese turtle
	PDIA2 (ENSPSIG00000009900)	JH209131.1	21,446 - 33,651 on strand +	protein disulfide isomerase family A member 2
	AXIN1 (ENSPSIG00000010666)	JH209131.1	44,165 - 148,493 on strand -	axin 1
	MRPL28 (ENSPSIG00000011177)	JH209131.1	240,304 - 252,317 on strand -	mitochondrial ribosomal protein L28
	ENSPSIG00000011383	JH209131.1	253,473 - 282,803 on strand -
	ENSPSIG00000011829	JH209131.1	310,892 - 315,170 on strand +
	ENSPSIG00000011856	JH209131.1	329,473 - 330,180 on strand -
	ENSPSIG00000011874	JH209131.1	336,348 - 337,115 on strand -
	ENSPSIG00000012157	JH209131.1	342,037 - 345,624 on strand -
	HBZ (ENSPSIG00000012161)	JH209131.1	350,866 - 355,240 on strand -	hemoglobin subunit zeta
	NPRL3 (ENSPSIG00000012214)	JH209131.1	368,282 - 457,913 on strand +	NPR3 like, GATOR1 complex subunit
	MPG (ENSPSIG00000012460)	JH209131.1	442,774 - 470,186 on strand -	N-methylpurine DNA glycosylase
	RHBDF1 (ENSPSIG00000012496)	JH209131.1	578,644 - 620,424 on strand +	rhomboid 5 homolog 1
	SNRNP25 (ENSPSIG00000012552)	JH209131.1	623,629 - 631,296 on strand -	small nuclear ribonucleoprotein U11/U12 subunit 25
	POLR3K (ENSPSIG00000012796)	JH209131.1	629,329 - 631,172 on strand +	RNA polymerase III subunit K
	ENSPSIG00000012840	JH209131.1	632,247 - 678,014 on strand -
	KIAA0556 (ENSPSIG00000013105)	JH209131.1	713,633 - 840,789 on strand +	KIAA0556
	Lizard
	PDIA2 (ENSACAG00000015377)	GL344563.1	23,219 - 26,733 on strand -	protein disulfide isomerase family A member 2
	AXIN1 (ENSACAG00000015327)		15,121 - 22,363 on strand +	axin 1
	MRPL28 (ENSACAG00000015301)		6,021 - 9,421 on strand +	mitochondrial ribosomal protein L28
	ENSACAG00000015267		578 - 3,490 on strand +
	Frog
	rhbdl1 (ENSXETG00000012110)	GL172810.1	268 - 8,754 on strand +	rhomboid, veinlet-like 1
	ENSXETG00000033286	GL172810.1	11,084 - 17,351 on strand -	uncharacterized protein LOC100145131
	stub1 (ENSXETG00000032697)	GL172810.1	18,062 - 26,282 on strand +	E3 ubiquitin-protein ligase CHIP
	jmjd8 (ENSXETG00000012120)	GL172810.1	28,172 - 32,374 on strand -	jumonji domain containing 8
	XB-GENE-5729976 (ENSXETG00000012121)	GL172810.1	34,586 - 46,046 on strand -	novel C3HC4 type (RING finger) and B-box zinc finger protein with SPRY domain
	tmem8a (ENSXETG00000012131)	GL172810.1	54,634 - 72,285 on strand +	transmembrane protein 8A
	RGS11 (ENSXETG00000034304)	GL172810.1	107,378 - 158,574 on strand -	regulator of G-protein signaling 11
	arhgdig (ENSXETG00000012139)	GL172810.1	181,030 - 221,160 on strand +	Rho GDP dissociation inhibitor (GDI) gamma
	pdia2 (ENSXETG00000012140)	GL172810.1	228,590 - 246,602 on strand +	protein disulfide isomerase family A, member 2
	axin1 (ENSXETG00000012143)	GL172810.1	252,377 - 276,696 on strand -	axin 1
	mprip (ENSXETG00000012146)	GL172810.1	352,162 - 437,040 on strand +	myosin phosphatase Rho interacting protein
	gid4 (ENSXETG00000012151)	GL172810.1	448,781 - 455,908 on strand -	GID complex subunit 4 homolog
	atpaf2 (ENSXETG00000012153)	GL172810.1	456,073 - 462,000 on strand +	ATP synthase mitochondrial F1 complex assembly factor 2
	lrrc48 (ENSXETG00000012155)	GL172810.1	462,156 - 472,534 on strand -	leucine rich repeat containing 48
	tom1l2 (ENSXETG00000012156)	GL172810.1	473,033 - 500,423 on strand +	target of myb1 like 2 membrane trafficking protein
	srebf1 (ENSXETG00000012160)	GL172810.1	518,694 - 531,671 on strand +	sterol regulatory element binding transcription factor 1
	rai1 (ENSXETG00000012165)	GL172810.1	545,978 - 558,338 on strand -	retinoic acid induced 1
	pemt (ENSXETG00000005734)	GL172810.1	723,769 - 806,949 on strand +	phosphatidylethanolamine N-methyltransferase
	rasd1 (ENSXETG00000005738)	GL172810.1	840,240 - 841,937 on strand +	RAS, dexamethasone-induced 1
	med9 (ENSXETG00000005740)	GL172810.1	846,237 - 853,916 on strand -	mediator complex subunit 9
	nt5m (ENSXETG00000005741)	GL172810.1	893,291 - 898,853 on strand -	5',3'-nucleotidase, mitochondrial
	cops3 (ENSXETG00000005742)	GL172810.1	902,587 - 913,315 on strand +	COP9 signalosome subunit 3
	flcn (ENSXETG00000005745)	GL172810.1	916,717 - 924,586 on strand +	folliculin
	pld6 (ENSXETG00000005747)	GL172810.1	929,308 - 932,242 on strand +	phospholipase D family, member 6
	Coelacanth
	dnase1 (ENSLACG00000014377)	JH127264.1	1,014,848 - 1,036,020 on strand -	deoxyribonuclease I
	ECI1 (ENSLACG00000014230)	JH127264.1	986,857 - 1,000,612 on strand +	enoyl-CoA delta isomerase 1
	PTX4 (ENSLACG00000014162)	JH127264.1	974,372 - 979,206 on strand -	pentraxin 4
	CLCN7 (ENSLACG00000013303)	JH127264.1	837,751 - 929,542 on strand -	chloride voltage-gated channel 7
	ENSLACG00000022418	JH127264.1	766,327 - 795,730 on strand -
	ENSLACG00000012692	JH127264.1	752,025 - 753,177 on strand +
	tmem8a (ENSLACG00000012144)	JH127264.1	681,785 - 731,702 on strand -	transmembrane protein 8A
	RGS11 (ENSLACG00000010264)	JH127264.1	487,135 - 594,985 on strand +	regulator of G-protein signaling 11
	ARHGDIG (ENSLACG00000007716)	JH127264.1	294,319 - 425,471 on strand -	Rho GDP dissociation inhibitor gamma
	PDIA2 (ENSLACG00000006605)	JH127264.1	226,688 - 283,726 on strand -	protein disulfide isomerase family A member 2
	HMOX2 (ENSLACG00000005680)	JH127264.1	179,427 - 211,535 on strand -	heme oxygenase 2
	DNAJA3 (ENSLACG00000004771)	JH127264.1	138,479 - 168,255 on strand +	DnaJ heat shock protein family (Hsp40) member A3
	ENSLACG00000003132	JH127264.1	71,922 - 98,478 on strand -
	Tetraodon
	pdlim3a (ENSTNIG00000007121)	18	8,884,190 - 8,887,993 on strand +	PDZ and LIM domain 3a
	npy2r (ENSTNIG00000007120)	18	8,890,552 - 8,891,727 on strand -	neuropeptide Y receptor Y2
	zgc:194355 (1 of many) (ENSTNIG00000007119)	18	8,895,487 - 8,896,536 on strand -	zgc:194355
	lrata (ENSTNIG00000007118)	18	8,897,235 - 8,898,139 on strand -	lecithin retinol acyltransferase a (phosphatidylcholine-retinol O-acyltransferase)
	fgg (ENSTNIG00000007117)	18	8,901,241 - 8,903,858 on strand +	fibrinogen gamma chain
	plrg1 (ENSTNIG00000007116)	18	8,904,330 - 8,908,244 on strand +	pleiotropic regulator 1
	si:dkey-30k22.7 (ENSTNIG00000007115)	18	8,909,306 - 8,926,265 on strand +	dachsous cadherin-related 2
	sfrp2 (ENSTNIG00000007114)	18	8,936,982 - 8,938,663 on strand +	secreted frizzled-related protein 2
	tnip2 (ENSTNIG00000007113)	18	8,941,066 - 8,942,960 on strand +	TNFAIP3 interacting protein 2
	fam193a (ENSTNIG00000007112)	18	8,947,660 - 8,954,672 on strand -	family with sequence similarity 193, member A
	arfip1 (ENSTNIG00000007111)	18	8,960,207 - 8,963,028 on strand +	ADP-ribosylation factor interacting protein 1 (arfaptin 1)
	fhdc1 (ENSTNIG00000000313)	18	8,970,143 - 8,976,514 on strand +	FH2 domain containing 1
	trim2a (ENSTNIG00000007110)	18	8,986,378 - 8,990,575 on strand +	tripartite motif containing 2a
	mnd1 (ENSTNIG00000007109)	18	8,992,099 - 8,997,854 on strand +	meiotic nuclear divisions 1 homolog (S. cerevisiae)
	si:ch211-208h7.4 (ENSTNIG00000005446)	18	9,000,815 - 9,017,606 on strand +	si:ch211-208h7.4
	pdia2 (ENSTNIG00000005447)	18	9,021,815 - 9,025,406 on strand +	protein disulfide isomerase family A, member 2
	zgc:136472 (ENSTNIG00000005448)	18	9,027,416 - 9,031,356 on strand +	zgc:136472
	syngr3a (ENSTNIG00000005449)	18	9,031,859 - 9,034,130 on strand +	synaptogyrin 3a
	cacna1hb (ENSTNIG00000005450)	18	9,039,298 - 9,066,782 on strand -	calcium channel, voltage-dependent, T type, alpha 1H subunit b
	ENSTNIG00000005451	18	9,080,362 - 9,086,032 on strand -
	cacng3a (ENSTNIG00000005452)	18	9,087,829 - 9,090,827 on strand -	calcium channel, voltage-dependent, gamma subunit 3a
	PRKCB (1 of many) (ENSTNIG00000005453)	18	9,092,644 - 9,106,636 on strand -	protein kinase C beta
	socs1b (ENSTNIG00000005454)	18	9,114,794 - 9,115,414 on strand +	suppressor of cytokine signaling 1b
	si:dkeyp-9d4.3 (ENSTNIG00000005455)	18	9,116,998 - 9,133,290 on strand +	CASK interacting protein 1
	gng13b (ENSTNIG00000004642)	18	9,137,310 - 9,139,428 on strand +	guanine nucleotide binding protein (G protein), gamma 13b
	chtf18 (ENSTNIG00000004643)	18	9,139,504 - 9,145,686 on strand -	CTF18, chromosome transmission fidelity factor 18 homolog (S. cerevisiae)
	ENSTNIG00000004644	18	9,147,013 - 9,150,794 on strand +
	si:dkeyp-9d4.4 (ENSTNIG00000004645)	18	9,150,803 - 9,155,539 on strand -	family with sequence similarity 83 member G
	grapb (ENSTNIG00000004646)	18	9,160,212 - 9,162,235 on strand -	GRB2-related adaptor protein b
	brat1 (ENSTNIG00000004647)	18	9,162,795 - 9,166,649 on strand -	BRCA1-associated ATM activator 1
	eif3bb (ENSTNIG00000004648)	18	9,167,104 - 9,171,459 on strand +	eukaryotic translation initiation factor 3, subunit Bb
	Fugu
	pdlim3a (ENSTRUG00000005644)	scaffold_40	243,320 - 247,272 on strand +	PDZ and LIM domain 3a
	npy2r (ENSTRUG00000005990)	scaffold_40	250,304 - 252,245 on strand -	neuropeptide Y receptor Y2
	zgc:194355 (ENSTRUG00000006036)	scaffold_40	255,525 - 256,657 on strand -	zgc:194355
	lrata (ENSTRUG00000006052)	scaffold_40	257,428 - 258,332 on strand -	lecithin retinol acyltransferase a (phosphatidylcholine-retinol O-acyltransferase)
	fgg (ENSTRUG00000006100)	scaffold_40	260,641 - 264,473 on strand +	fibrinogen gamma chain
	plrg1 (ENSTRUG00000006373)	scaffold_40	265,182 - 268,906 on strand +	pleiotropic regulator 1
	si:dkey-30k22.7 (ENSTRUG00000006819)	scaffold_40	271,418 - 289,113 on strand +	dachsous cadherin-related 2
	sfrp2 (ENSTRUG00000007015)	scaffold_40	297,731 - 300,407 on strand +	secreted frizzled-related protein 2
	tnip2 (ENSTRUG00000007100)	scaffold_40	302,135 - 304,903 on strand +	TNFAIP3 interacting protein 2
	fam193a (ENSTRUG00000007230)	scaffold_40	309,726 - 316,688 on strand -	family with sequence similarity 193, member A
	arfip1 (ENSTRUG00000007441)	scaffold_40	323,137 - 326,303 on strand +	ADP-ribosylation factor interacting protein 1 (arfaptin 1)
	fhdc1 (ENSTRUG00000007597)	scaffold_40	335,407 - 341,880 on strand +	FH2 domain containing 1
	trim2a (ENSTRUG00000007701)	scaffold_40	353,843 - 358,711 on strand +	tripartite motif containing 2a
	mnd1 (ENSTRUG00000007955)	scaffold_40	360,562 - 367,510 on strand +	meiotic nuclear divisions 1 homolog (S. cerevisiae)
	si:ch211-208h7.4 (ENSTRUG00000008066)	scaffold_40	369,228 - 386,551 on strand +	si:ch211-208h7.4
	pdia2 (ENSTRUG00000008326)	scaffold_40	391,877 - 395,764 on strand +	protein disulfide isomerase family A, member 2
	zgc:136472 (ENSTRUG00000008569)	scaffold_40	399,423 - 403,024 on strand +	zgc:136472
	syngr3a (ENSTRUG00000008610)	scaffold_40	403,838 - 406,464 on strand +	synaptogyrin 3a
	cacna1hb (ENSTRUG00000008710)	scaffold_40	411,520 - 440,805 on strand -	calcium channel, voltage-dependent, T type, alpha 1H subunit b
	ENSTRUG00000009471	scaffold_40	454,204 - 459,514 on strand -
	cacng3a (ENSTRUG00000009488)	scaffold_40	461,412 - 464,475 on strand -	calcium channel, voltage-dependent, gamma subunit 3a
	PRKCB (1 of many) (ENSTRUG00000009582)	scaffold_40	466,548 - 484,029 on strand -	protein kinase C beta
	socs1b (ENSTRUG00000010148)	scaffold_40	493,007 - 493,658 on strand +	suppressor of cytokine signaling 1b
	si:dkeyp-9d4.3 (ENSTRUG00000010183)	scaffold_40	495,606 - 514,183 on strand +	CASK interacting protein 1
	gng13b (ENSTRUG00000010301)	scaffold_40	520,438 - 520,714 on strand +	guanine nucleotide binding protein (G protein), gamma 13b
	chtf18 (ENSTRUG00000010314)	scaffold_40	521,088 - 528,540 on strand -	CTF18, chromosome transmission fidelity factor 18 homolog (S. cerevisiae)
	si:dkeyp-9d4.5 (ENSTRUG00000010594)	scaffold_40	530,301 - 544,858 on strand +	solute carrier family 5 member 10
	ENSTRUG00000010810	scaffold_40	535,903 - 539,890 on strand -
	grapb (ENSTRUG00000010816)	scaffold_40	545,842 - 548,236 on strand -	GRB2-related adaptor protein b
	brat1 (ENSTRUG00000010951)	scaffold_40	548,810 - 552,776 on strand -	BRCA1-associated ATM activator 1
	eif3bb (ENSTRUG00000011064)	scaffold_40	553,275 - 557,868 on strand +	eukaryotic translation initiation factor 3, subunit Bb
		scaffold_40
	Platyfish
	ENSXMAG00000020130	JH557131.1	38,053 - 38,355 on strand +
	pdia2 (ENSXMAG00000000488)	JH557131.1	57,168 - 71,479 on strand +	protein disulfide isomerase family A, member 2
	zgc:136472 (ENSXMAG00000000498)	JH557131.1	92,882 - 123,338 on strand +	zgc:136472
	syngr3a (ENSXMAG00000000502)	JH557131.1	127,397 - 133,891 on strand +	synaptogyrin 3a
	ENSXMAG00000007580	JH560289.1	21 - 3,346 on strand +
	Medaka
	tlr3 (ENSORLG00000008184)	1	24,574,552 - 24,580,330 on strand -	toll-like receptor 3
	sorbs2a (ENSORLG00000008216)	1	24,616,774 - 24,637,836 on strand +	sorbin and SH3 domain containing 2a
	pdlim3a (ENSORLG00000008226)	1	24,658,028 - 24,664,988 on strand +	PDZ and LIM domain 3a
	zgc:194355 (1 of many) (ENSORLG00000008231)	1	24,690,001 - 24,691,192 on strand -	zgc:194355
	lrata (ENSORLG00000008237)	1	24,691,861 - 24,693,577 on strand -	lecithin retinol acyltransferase a (phosphatidylcholine-retinol O-acyltransferase)
	fgg (ENSORLG00000008257)	1	24,703,285 - 24,706,247 on strand +	fibrinogen gamma chain
	plrg1 (ENSORLG00000008305)	1	24,707,212 - 24,713,541 on strand +	pleiotropic regulator 1
	si:dkey-30k22.7 (ENSORLG00000008328)	1	24,714,973 - 24,754,136 on strand +	dachsous cadherin-related 2
	ENSORLG00000008332		24,777,628 - 24,778,375 on strand +
	tnip2 (ENSORLG00000008344)		24,784,480 - 24,786,535 on strand +	TNFAIP3 interacting protein 2
	fam193a (ENSORLG00000008376)		24,792,910 - 24,800,792 on strand -	family with sequence similarity 193, member A
	ARFIP1 (ENSORLG00000008385)		24,815,255 - 24,825,658 on strand +	ADP ribosylation factor interacting protein 1
	trim2a (ENSORLG00000008416)		24,893,482 - 24,904,101 on strand +	tripartite motif containing 2a
	mnd1 (ENSORLG00000008431)		24,905,798 - 24,918,886 on strand +	meiotic nuclear divisions 1 homolog (S. cerevisiae)
	ENSORLG00000008480		24,929,131 - 24,942,511 on strand +
	pdia2 (ENSORLG00000008560)		24,956,529 - 24,963,606 on strand +	protein disulfide isomerase family A, member 2
	ENSORLG00000008570		24,966,411 - 24,970,602 on strand +
	zgc:136472 (ENSORLG00000008581)		24,976,201 - 24,980,787 on strand +	zgc:136472
	syngr3a (ENSORLG00000008586)		24,982,089 - 24,989,061 on strand +	synaptogyrin 3a
	ENSORLG00000008593		24,992,675 - 24,994,431 on strand -
	cacna1hb (ENSORLG00000008618)		24,998,977 - 25,055,088 on strand -	calcium channel, voltage-dependent, T type, alpha 1H subunit b
	ENSORLG00000008630		25,080,001 - 25,094,135 on strand -
	cacng3a (ENSORLG00000008646)		25,099,089 - 25,108,957 on strand -	calcium channel, voltage-dependent, gamma subunit 3a
	prkcba (ENSORLG00000008705)		25,110,262 - 25,143,221 on strand -	protein kinase C, beta a
	ENSORLG00000008712		25,157,992 - 25,165,186 on strand +
	socs1b (ENSORLG00000008715)		25,168,617 - 25,173,035 on strand +	suppressor of cytokine signaling 1b
	si:dkeyp-9d4.3 (ENSORLG00000008740)		25,176,699 - 25,223,335 on strand +	CASK interacting protein 1
	gng13b (ENSORLG00000008747)		25,234,352 - 25,234,640 on strand +	guanine nucleotide binding protein (G protein), gamma 13b
	chtf18 (ENSORLG00000008778)		25,234,943 - 25,247,453 on strand -	CTF18, chromosome transmission fidelity factor 18 homolog (S. cerevisiae)
	si:dkeyp-9d4.5 (ENSORLG00000008814)		25,250,411 - 25,280,882 on strand +	solute carrier family 5 member 10
	ENSORLG00000008818		25,263,270 - 25,268,156 on strand -
	Lamprey
	PDIA2 (ENSPMAG00000001848)	GL480798	2,613 - 20,969 on strand -	protein disulfide isomerase family A member 2
	trypanosoma brucei
	Tb10.6k15.2100	10	2,047,283 - 2,047,924 on strand +	hypothetical protein, conserved
	Tb10.6k15.2110	10	2,045,898 - 2,046,434 on strand +	hypothetical protein, conserved
	Tb10.6k15.2130	10	2,043,955 - 2,045,484 on strand +	ribonuclease, putative
	Tb10.6k15.2140	10	2,043,036 - 2,043,230 on strand +	hypothetical protein
	Tb10.6k15.2160	10	2,039,803 - 2,040,399 on strand -	hypothetical protein
	Tb10.6k15.2170	10	2,037,090 - 2,037,797 on strand -	hypothetical protein, conserved
	Tb10.6k15.2180	10	2,036,169 - 2,036,543 on strand -	cytochrome c oxidase subunit IX
	Tb10.6k15.2190	10	2,034,870 - 2,035,721 on strand -	acetyltransferase, putative
	Tb10.6k15.2200	10	2,034,122 - 2,034,613 on strand -	hypothetical protein, conserved
	Tb10.6k15.2220	10	2,031,213 - 2,033,435 on strand -	eukaryotic translation initiation factor 3 subunit 8, putative
	Tb10.6k15.2230	10	2,030,528 - 2,030,968 on strand -	hypothetical protein, conserved
	Tb10.6k15.2250	10	2,027,569 - 2,029,791 on strand -	eukaryotic translation initiation factor 3 subunit 8, putative
	Tb10.6k15.2260	10	2,026,788 - 2,027,354 on strand -	hypothetical protein, conserved
	Tb10.6k15.2270	10	2,025,774 - 2,026,568 on strand -	hypothetical protein, conserved
	Tb10.6k15.2280	10	2,024,416 - 2,025,540 on strand -	hypothetical protein, conserved
	Tb10.6k15.2290	10	2,022,258 - 2,023,751 on strand -	protein disulfide isomerase
	Tb10.6k15.2300	10	2,020,433 - 2,020,954 on strand -	hypothetical protein, conserved
	Tb10.6k15.2310	10	2,018,475 - 2,020,238 on strand -	RNA editing complex protein MP63
	Tb10.6k15.2320	10	2,017,436 - 2,018,245 on strand -	hypothetical protein, conserved
	Tb10.6k15.2330	10	2,015,484 - 2,017,097 on strand -	t-complex protein 1, theta subunit, putative
	Tb10.6k15.2340	10	2,010,889 - 2,014,500 on strand -	hypothetical protein, conserved
	Tb10.6k15.2350	10	2,006,710 - 2,010,687 on strand -	nuclear pore complex protein (NUP155), putative
	Tb10.6k15.2360	10	2,006,108 - 2,006,482 on strand -	hypothetical protein, conserved
	Tb10.6k15.2370	10	2,004,903 - 2,005,808 on strand -	hypothetical protein, conserved
	Tb10.6k15.2380	10	2,003,748 - 2,004,233 on strand -	hypothetical protein, conserved
	Tb10.6k15.2390	10	2,002,225 - 2,003,667 on strand -	hypothetical protein, conserved
	Tb10.6k15.2400	10	1,999,418 - 2,002,030 on strand -	hypothetical protein, conserved
	Tb10.6k15.2410	10	1,997,685 - 1,998,509 on strand -	hypothetical protein, conserved
	Tb10.6k15.2430	10	1,995,439 - 1,996,503 on strand -	hypothetical protein, conserved
	Tb10.6k15.2440	10	1,994,495 - 1,994,965 on strand -	hypothetical protein, conserved
	Tb10.6k15.2450		1,992,014 - 1,994,236 on strand -	hypothetical protein, conserved
	Trypanosoma cruzi
	Tc00.1047053507611.50	tcruzi_1047053507611	13,075 - 13,518 on strand -	hypothetical protein, conserved
	Tc00.1047053507611.110	tcruzi_1047053507611	22,822 - 25,503 on strand -	retrotransposon hot spot (RHS) protein, putative
	Tc00.1047053507611.120	tcruzi_1047053507611	29,158 - 30,426 on strand -	expression site-associated gene (ESAG-like) protein, putative
	Tc00.1047053507611.170	tcruzi_1047053507611	49,650 - 52,013 on strand -	trans-sialidase, putative
	Tc00.1047053507611.180	tcruzi_1047053507611	52,471 - 52,959 on strand +	hypothetical protein
	Tc00.1047053507611.199	tcruzi_1047053507611	60,653 - 71,029 on strand -	dispersed gene family protein 1 (DGF-1), putative
	Tc00.1047053507611.210	tcruzi_1047053507611	71,284 - 71,736 on strand -	hypothetical protein
	Tc00.1047053507611.270	tcruzi_1047053507611	84,431 - 85,138 on strand +	hypothetical protein, conserved
	Tc00.1047053507611.280	tcruzi_1047053507611	85,674 - 86,048 on strand +	cytochrome c oxidase subunit IX, putative
	Tc00.1047053507611.290	tcruzi_1047053507611	86,322 - 87,170 on strand +	acetyltransferase, putative
	Tc00.1047053507611.300	tcruzi_1047053507611	87,352 - 87,903 on strand +	hypothetical protein, conserved
	Tc00.1047053507611.310	tcruzi_1047053507611	88,578 - 90,728 on strand +	eukaryotic translation initiation factor 3 subunit 8, putative
	Tc00.1047053507611.320	tcruzi_1047053507611	90,976 - 91,563 on strand +	hypothetical protein, conserved
	Tc00.1047053507611.330	tcruzi_1047053507611	91,789 - 92,586 on strand +	hypothetical protein, conserved
	Tc00.1047053507611.340	tcruzi_1047053507611	92,773 - 93,894 on strand +	hypothetical protein, conserved
	Tc00.1047053507611.370	tcruzi_1047053507611	98,523 - 99,968 on strand +	protein disulfide isomerase, putative
	Tc00.1047053507611.380	tcruzi_1047053507611	100,444 - 101,085 on strand +	hypothetical protein
	Tc00.1047053507611.389	tcruzi_1047053507611	101,482 - 101,871 on strand +	hypothetical protein, conserved
	Tc00.1047053507723.20	tcruzi_1047053507723	2,392 - 2,865 on strand -	hypothetical protein
	Tc00.1047053507723.50	tcruzi_1047053507723	15,053 - 17,767 on strand -	trans-sialidase, putative
	Tc00.1047053507723.60	tcruzi_1047053507723	17,968 - 18,693 on strand -	hypothetical protein
	Tc00.1047053507723.90	tcruzi_1047053507723	32,247 - 32,954 on strand +	hypothetical protein, conserved
	Tc00.1047053507723.100	tcruzi_1047053507723	33,516 - 33,890 on strand +	cytochrome c oxidase subunit IX, putative
	Tc00.1047053507723.110	tcruzi_1047053507723	34,147 - 34,995 on strand +	acetyltransferase, putative
	Tc00.1047053507723.120	tcruzi_1047053507723	35,254 - 35,745 on strand +	hypothetical protein, conserved
	Tc00.1047053507723.130	tcruzi_1047053507723	36,385 - 38,535 on strand +	eukaryotic translation initiation factor 3 subunit 8, putative
	Tc00.1047053507723.140	tcruzi_1047053507723	38,672 - 39,340 on strand +	hypothetical protein, conserved
	Tc00.1047053507723.150	tcruzi_1047053507723	39,471 - 40,367 on strand +	hypothetical protein, conserved
	Tc00.1047053507723.160	tcruzi_1047053507723	40,554 - 41,675 on strand +	hypothetical protein, conserved
	Tc00.1047053507723.189	tcruzi_1047053507723	46,117 - 46,660 on strand +	protein disulfide isomerase, putative
	Trypanosoma rangeli SC58
	TRSC58_02758	Cont2758	1,895 - 2,635 on strand +	hypothetical protein
	TRSC58_06376	Cont6376	420 - 1,613 on strand +	protein disulfide isomerase
	Leishmania donovani
	LDBPK_367360	36	2,710,353 - 2,711,078 on strand -	hypothetical protein, conserved
	LDBPK_367350		2,708,741 - 2,709,115 on strand -	cytochrome c oxidase subunit I
	LDBPK_367340		2,707,345 - 2,708,184 on strand -	acetyltransferase, putative
	LDBPK_367330		2,706,415 - 2,706,909 on strand -	hypothetical protein, conserved
	LDBPK_367320		2,703,147 - 2,705,342 on strand -	eukaryotic translation initiation factor 3 subunit 8, putative
	LDBPK_367310		2,701,440 - 2,702,336 on strand -	hypothetical protein, conserved
	LDBPK_367300		2,699,726 - 2,700,832 on strand -	hypothetical protein, conserved
	LDBPK_367290		2,697,967 - 2,699,151 on strand -	delta8 fatty acid desaturase-like protein
	LDBPK_367280		2,695,282 - 2,696,715 on strand -	protein disulfide isomerase
	LDBPK_367270		2,694,073 - 2,694,480 on strand -	hypothetical protein, conserved
	LDBPK_367260		2,691,749 - 2,693,629 on strand -	RNA editing comple protein MP63
	LDBPK_367250		2,690,187 - 2,690,993 on strand -	hypothetical protein, conserved
	LDBPK_367240		2,687,706 - 2,689,319 on strand -	chaperonin, putative
	LDBPK_367230		2,684,339 - 2,686,462 on strand -	hypothetical protein, conserved
	LDBPK_367220		2,679,545 - 2,683,465 on strand -	nuclear pore complex protein (NUP155), putative
	LDBPK_367210		2,676,322 - 2,677,182 on strand -	DNA-binding protein, putative
	LDBPK_367200		2,675,221 - 2,675,835 on strand -	hypothetical protein, conserved
	LDBPK_367190		2,672,895 - 2,674,184 on strand -	hypothetical protein, conserved
	LDBPK_367180		2,669,537 - 2,672,254 on strand -	hypothetical protein, conserved
	LDBPK_367170		2,668,724 - 2,668,957 on strand -	hypothetical protein
	LDBPK_367160		2,666,607 - 2,667,656 on strand -	hypothetical protein, conserved
	LDBPK_367150		2,664,061 - 2,665,491 on strand -	amino acid permease aap11ld-like protein
	LDBPK_367140		2,661,577 - 2,662,650 on strand -	hypothetical protein, conserved
	LDBPK_367130		2,660,354 - 2,660,833 on strand -	hypothetical protein, conserved
	Leishmania braziliensis MHOM BR 75 M2904
	LBRM_35_7400	36	2,683,460 - 2,683,984 on strand -	conserved hypothetical protein
	LBRM_35_7390	36	2,681,972 - 2,682,346 on strand -	cytochrome c oxidase subunit I
	LBRM_35_7380	36	2,680,588 - 2,681,469 on strand -	putative acetyltransferase
	LBRM_35_7370	36	2,679,640 - 2,680,134 on strand -	putative U1A small nuclear ribonucleoprotein
	LBRM_35_7360	36	2,676,403 - 2,678,598 on strand -	putative eukaryotic translation initiation factor 3 subunit 8
	LBRM_35_7350	36	2,674,731 - 2,675,627 on strand -	conserved hypothetical protein
	LBRM_35_7340	36	2,673,011 - 2,674,111 on strand -	conserved hypothetical protein
	LBRM_35_7330	36	2,671,265 - 2,672,467 on strand -	putative delta-6 fatty acid desaturase
	LBRM_35_7320	36	2,668,630 - 2,670,042 on strand -	protein disulfide isomerase
	LBRM_35_7310	36	2,667,413 - 2,667,820 on strand -	conserved hypothetical protein
	LBRM_35_7300	36	2,665,110 - 2,666,981 on strand -	RNA editing comple protein MP63
	LBRM_35_7290	36	2,663,573 - 2,664,379 on strand -	conserved hypothetical protein
	LBRM_35_7280	36	2,661,143 - 2,662,756 on strand -	putative T-complex protein 1, theta subunit
	LBRM_35_7270	36	2,657,679 - 2,659,859 on strand -	conserved hypothetical protein
	LBRM_35_7260	36	2,652,919 - 2,656,830 on strand -	putative nuclear pore complex protein (NUP155)
	LBRM_35_7250	36	2,649,862 - 2,650,722 on strand -	putative DNA-binding protein
	LBRM_35_7240	36	2,648,877 - 2,649,371 on strand -	conserved hypothetical protein
	LBRM_35_7230	36	2,646,407 - 2,647,696 on strand -	conserved hypothetical protein
	LBRM_35_7220	36	2,643,111 - 2,645,825 on strand -	conserved hypothetical protein
	LBRM_35_7210	36	2,642,308 - 2,642,541 on strand -	hypothetical protein
	LBRM_35_7200	36	2,640,258 - 2,641,310 on strand -	conserved hypothetical protein
	LBRM_35_7180	36	2,635,381 - 2,636,454 on strand -	conserved hypothetical protein
	LBRM_35_7170	36	2,634,153 - 2,634,632 on strand -	conserved hypothetical protein
	LBRM_35_7160	36	2,631,263 - 2,633,476 on strand -	conserved hypothetical protein
	Leishmania panamensis
	LPMP_357230	35	2,607,674 - 2,608,399 on strand -	hypothetical protein
	LPMP_357220	35	2,606,167 - 2,606,541 on strand -	cytochrome c oxidase subunit I
	LPMP_357210	35	2,604,784 - 2,605,665 on strand -	acetyltransferase, putative
	LPMP_357200	35	2,603,831 - 2,604,325 on strand -	U1A small nuclear ribonucleoprotein, putative
	LPMP_357190	35	2,600,591 - 2,602,786 on strand -	eukaryotic translation initiation factor 3 subunit 8, putative
	LPMP_357180	35	2,598,920 - 2,599,816 on strand -	hypothetical protein
	LPMP_357170	35	2,597,199 - 2,598,299 on strand -	hypothetical protein
	LPMP_357160	35	2,595,450 - 2,596,652 on strand -	delta-6 fatty acid desaturase, putative
	PDI-2 (LPMP_357150)	35	2,592,491 - 2,593,903 on strand -	protein disulfide isomerase
	LPMP_357140	35	2,591,272 - 2,591,679 on strand -	hypothetical protein
	LPMP_357130	35	2,588,971 - 2,590,842 on strand -	RNA editing comple protein MP63
	LPMP_357120	35	2,587,441 - 2,588,247 on strand -	ribosomal protein L1-like protein
	LPMP_357110	35	2,585,007 - 2,586,620 on strand -	chaperonin, putative
	LPMP_357100	35	2,581,582 - 2,583,720 on strand -	hypothetical protein
	LPMP_357090	35	2,576,780 - 2,580,691 on strand -	nucleoporin, putative
	LPMP_357080	35	2,573,666 - 2,574,526 on strand -	DNA-binding protein, putative
	LPMP_357070	35	2,572,681 - 2,573,175 on strand -	hypothetical protein
	LPMP_357060	35	2,570,209 - 2,571,498 on strand -	hypothetical protein
	LPMP_357050	35	2,566,915 - 2,569,629 on strand -	hypothetical protein
	LBRM_35_7240	35	2,648,877 - 2,649,371 on strand -	conserved hypothetical protein
	LPMP_357030	35	2,564,047 - 2,565,099 on strand -	hypothetical protein
	LPMP_357010	35	2,559,115 - 2,560,152 on strand -	hypothetical protein
	LPMP_357000	35	2,557,892 - 2,558,371 on strand -	hypothetical protein
	LPMP_356990	35	2,555,002 - 2,557,215 on strand -	hypothetical protein
	Giardia lambia ATCC 50803
	GL50803_36074	ctg02_26	45,473 - 45,610 on strand -	hypothetical protein
	GL50803_5874	ctg02_26	45,767 - 49,462 on strand -	hypothetical protein
	GL50803_36073	ctg02_26	45,805 - 45,909 on strand -	hypothetical protein
	GL50803_14049	ctg02_26	49,512 - 49,922 on strand +	Ribosomal protein L32
	GL50803_24528	ctg02_26	50,007 - 51,221 on strand -	hypothetical protein
	GL50803_11312	ctg02_26	51,282 - 51,725 on strand +	TRAPPC2, putative
	GL50803_11311	ctg02_26	51,751 - 52,854 on strand +	Kinase, NEK
	GL50803_36072	ctg02_26	52,585 - 52,722 on strand -	hypothetical protein
	GL50803_16516	ctg02_26	52,945 - 55,092 on strand -	Xenotropic and polytropic murine leukemia virus receptor
	GL50803_11309	ctg02_26	55,178 - 59,185 on strand -	High cysteine membrane protein Group 1
	GL50803_15392	ctg02_26	59,550 - 62,222 on strand +	Replication factor C, subunit 1
	GL50803_36046	ctg02_26	60,453 - 60,587 on strand -	hypothetical protein
	GL50803_11305	ctg02_26	62,243 - 62,854 on strand +	hypothetical protein
	GL50803_11304	ctg02_26	62,862 - 63,257 on strand +	hypothetical protein
	GL50803_36069	ctg02_26	62,874 - 63,236 on strand -	Ribosomal protein L34
	GL50803_29487	ctg02_26	63,449 - 64,153 on strand +	Protein disulfide isomerase PDI1
	GL50803_36068	ctg02_26	63,497 - 64,138 on strand -	hypothetical protein
	GL50803_29486	ctg02_26	64,204 - 64,989 on strand +	hypothetical protein
	GL50803_36044	ctg02_26	64,707 - 64,877 on strand -	hypothetical protein
	GL50803_29485	ctg02_26	64,973 - 65,440 on strand -	hypothetical protein
	GL50803_11301	ctg02_26	64,979 - 65,434 on strand +	Nucleoside diphosphate kinase
	GL50803_11299	ctg02_26	65,958 - 67,727 on strand +	Amino acid transporter, putative
	GL50803_36067	ctg02_26	67,110 - 67,310 on strand -	hypothetical protein
	GL50803_19430	ctg02_26	67,497 - 67,934 on strand -	hypothetical protein
	GL50803_11297	ctg02_26	67,753 - 69,525 on strand +	hypothetical protein
	GL50803_36066	ctg02_26	68,398 - 68,538 on strand -	hypothetical protein
	GL50803_16513	ctg02_26	69,561 - 76,922 on strand +	hypothetical protein
	GL50803_90329	ctg02_26	76,954 - 77,196 on strand -	hypothetical protein
	GL50803_11290	ctg02_26	77,483 - 79,147 on strand +	Kinase, CMGC CDK
	GL50803_36041	ctg02_26	78,644 - 78,754 on strand -	hypothetical protein
	GL50803_16512	ctg02_26	79,170 - 81,467 on strand -	DNA repair helicase TFIIH P90

## Sheet: ERP27
	ERP27
	Human
	Nome do gene	Cromossomo	Distância	Nome da proteína
	PLEKHA5 (ENSG00000052126)	12	19,129,752 - 19,376,400 on strand +	pleckstrin homology domain containing A5
	CAPZA3 (ENSG00000177938)	12	18,738,101 - 18,739,187 on strand +	capping actin protein of muscle Z-line alpha subunit 3
	PLCZ1 (ENSG00000139151)	12	18,683,169 - 18,738,057 on strand -	phospholipase C zeta 1
	PIK3C2G (ENSG00000139144)	12	18,247,614 - 18,648,416 on strand +	phosphatidylinositol-4-phosphate 3-kinase catalytic subunit type 2 gamma
	RERGL (ENSG00000111404)	12	12 : 18,080,869 - 18,320,107 on strand -	RERG like
	LMO3 (ENSG00000048540)	12	16,548,373 - 16,610,594 on strand -	LIM domain only 3
	MGST1 (ENSG00000008394)	12	16,347,142 - 16,609,259 on strand +	microsomal glutathione S-transferase 1
	SLC15A5 (ENSG00000188991)	12	16,188,485 - 16,277,685 on strand -	solute carrier family 15 member 5
	DERA (ENSG00000023697)	12	15,911,172 - 16,037,282 on strand +	deoxyribose-phosphate aldolase
	STRAP (ENSG00000023734)	12	15,882,391 - 15,903,478 on strand +	serine/threonine kinase receptor associated protein
	EPS8 (ENSG00000151491)	12	15,620,158 - 15,882,329 on strand -	epidermal growth factor receptor pathway substrate 8
	PTPRO (ENSG00000151490)	12	15,322,397 - 15,597,399 on strand +	protein tyrosine phosphatase, receptor type O
	RERG (ENSG00000134533)	12	15,107,783 - 15,348,675 on strand -	RAS like estrogen regulated growth inhibitor
	PDE6H (ENSG00000139053)	12	14,973,022 - 14,981,865 on strand +	phosphodiesterase 6H
	ARHGDIB (ENSG00000111348)	12	14,942,017 - 14,961,728 on strand -	Rho GDP dissociation inhibitor beta
	ERP27 (ENSG00000139055)	12	14,914,035 - 14,939,082 on strand -	endoplasmic reticulum protein 27
	MGP (ENSG00000111341)	12	14,881,181 - 14,885,926 on strand -	matrix Gla protein
	ART4 (ENSG00000111339)	12	14,825,569 - 14,843,495 on strand -	ADP-ribosyltransferase 4
	SMCO3 (ENSG00000179256)	12	14,804,650 - 14,814,182 on strand -	single-pass membrane protein with coiled-coil domains 3
	C12orf60 (ENSG00000182993)	12	14,803,572 - 14,906,586 on strand +	chromosome 12 open reading frame 60
	WBP11 (ENSG00000084463)	12	14,784,579 - 14,803,540 on strand -	WW domain binding protein 11
	H2AFJ (ENSG00000246705)	12	14,774,383 - 14,778,002 on strand +	H2A histone family member J
	HIST4H4 (ENSG00000197837)	12	14,767,999 - 14,771,131 on strand -	histone cluster 4, H4
	GUCY2C (ENSG00000070019)	12	14,612,632 - 14,696,585 on strand -	guanylate cyclase 2C
	PLBD1 (ENSG00000121316)	12	14,503,661 - 14,568,349 on strand -	phospholipase B domain containing 1
	ATF7IP (ENSG00000171681)	12	14,365,632 - 14,502,935 on strand +	activating transcription factor 7 interacting protein
	GRIN2B (ENSG00000273079)	12	13,437,942 - 13,981,957 on strand -	glutamate ionotropic receptor NMDA type subunit 2B
	EMP1 (ENSG00000134531)	12	13,196,716 - 13,219,939 on strand +	epithelial membrane protein 1
	GSG1 (ENSG00000111305)	12	13,083,560 - 13,103,683 on strand -	germ cell associated 1
	FAM234B (ENSG00000084444)	12	13,044,284 - 13,142,521 on strand +	family with sequence similarity 234 member B
	HEBP1 (ENSG00000013583)	12	12,974,864 - 13,000,273 on strand -	heme binding protein 1
	Orangutan
	PLEKHA5 (ENSPPYG00000004344)	12	19,881,294 - 20,121,654 on strand +	pleckstrin homology domain containing A5
	CAPZA3 (ENSPPYG00000004342)	12	19,469,404 - 19,470,303 on strand +	capping actin protein of muscle Z-line alpha subunit 3
	PLCZ1 (ENSPPYG00000004341)	12	19,413,810 - 19,469,150 on strand -	phospholipase C zeta 1
	RERGL (ENSPPYG00000004340)	12	18,795,612 - 18,804,093 on strand -	RERG like
	ENSPPYG00000004339	12	17,614,820 - 17,616,196 on strand +
	LMO3 (ENSPPYG00000004338)	12	17,139,629 - 17,202,462 on strand -	Pongo abelii LIM domain only 3 (rhombotin-like 2) (LMO3), transcript variant 2, mRNA.
	MGST1 (ENSPPYG00000004337)	12	16,958,480 - 16,978,502 on strand +	microsomal glutathione S-transferase 1
	SLC15A5 (ENSPPYG00000004336)	12	16,785,608 - 16,878,217 on strand -	solute carrier family 15 member 5
	DERA (ENSPPYG00000004335)	12	16,480,750 - 16,616,816 on strand +	deoxyribose-phosphate aldolase
	STRAP (ENSPPYG00000004334)	12	16,452,204 - 16,473,276 on strand +	serine/threonine kinase receptor associated protein
	EPS8 (ENSPPYG00000004333)	12	16,170,940 - 16,345,920 on strand -	Pongo abelii epidermal growth factor receptor pathway substrate 8 (EPS8), mRNA.
	PTPRO (ENSPPYG00000004332)	12	15,842,405 - 16,147,619 on strand +	protein tyrosine phosphatase, receptor type O
	RERG (ENSPPYG00000004331)	12	15,587,054 - 15,714,044 on strand -	RAS like estrogen regulated growth inhibitor
	PDE6H (ENSPPYG00000004330)	12	15,455,822 - 15,459,304 on strand +	phosphodiesterase 6H
	ARHGDIB (ENSPPYG00000004329)	12	15,419,837 - 15,428,271 on strand -	Rho GDP dissociation inhibitor beta
	ERP27 (ENSPPYG00000004328)	12	15,392,448 - 15,416,289 on strand -	endoplasmic reticulum protein 27
	ENSPPYG00000004327	12	15,359,300 - 15,363,350 on strand -
	ART4 (ENSPPYG00000004326)	12	15,305,765 - 15,319,830 on strand -	ADP-ribosyltransferase 4 (Dombrock blood group)
	C12orf60 (ENSPPYG00000004325)	12	15,299,318 - 15,300,052 on strand +	chromosome 12 open reading frame 60
	SMCO3 (ENSPPYG00000004324)	12	15,281,797 - 15,282,474 on strand -	single-pass membrane protein with coiled-coil domains 3
	WBP11 (ENSPPYG00000004323)	12	15,261,184 - 15,279,351 on strand -	WW domain binding protein 11
	H2AFJ (ENSPPYG00000004322)	12	15,249,269 - 15,249,658 on strand +	H2A histone family member J
	HIST2H4A (ENSPPYG00000004321)	12	15,245,577 - 15,245,888 on strand -	Histone H4
	GUCY2C (ENSPPYG00000004320)	12	15,092,220 - 15,175,731 on strand -	guanylate cyclase 2C
	PLBD1 (ENSPPYG00000004319)	12	14,937,163 - 15,021,061 on strand -	phospholipase B domain containing 1
	ATF7IP (ENSPPYG00000004318)	12	14,808,268 - 14,925,893 on strand +	activating transcription factor 7 interacting protein
	GRIN2B (ENSPPYG00000004317)	12	13,989,926 - 14,416,409 on strand -	glutamate ionotropic receptor NMDA type subunit 2B
	EMP1 (ENSPPYG00000004316)	12	13,647,140 - 13,665,587 on strand +	epithelial membrane protein 1
	GSG1 (ENSPPYG00000004315)	12	13,532,299 - 13,544,278 on strand -	germ cell associated 1
	FAM234B (ENSPPYG00000004314)	12	13,492,977 - 13,532,068 on strand +	family with sequence similarity 234 member B
	ENSPPYG00000004313	12	13,440,529 - 13,442,137 on strand +
	Rhesus
	Nome do gene	Cromossomo	Distancia	Nome da proteína
	ENSMMUG00000042911	11	19,153,283 - 19,154,132 on strand +
	PIK3C2G (ENSMMUG00000022174)	11	19,114,169 - 19,518,536 on strand +	phosphatidylinositol-4-phosphate 3-kinase catalytic subunit type 2 gamma
	RERGL (ENSMMUG00000047016)	11	18,936,781 - 18,948,856 on strand -	RERG like
	ENSMMUG00000032104	11	18,404,450 - 18,404,605 on strand -
	ENSMMUG00000023723	11	18,166,987 - 18,167,492 on strand +
	ENSMMUG00000042775	11	17,564,816 - 17,565,409 on strand -
	RNPS1 (ENSMMUG00000041726)	11	7,564,271 - 17,565,128 on strand +	RNA binding protein with serine rich domain 1
	LMO3 (ENSMMUG00000040307)	11	17,305,075 - 17,365,119 on strand -	LIM domain only protein 3
	MGST1 (ENSMMUG00000002359)	11	17,115,998 - 17,145,353 on strand +	microsomal glutathione S-transferase 1
	SLC15A5 (ENSMMUG00000002358)	11	16,949,664 - 17,023,219 on strand -	solute carrier family 15 member 5
	DERA (ENSMMUG00000013309)	11	16,621,770 - 16,791,614 on strand +	deoxyribose-phosphate aldolase
	STRAP (ENSMMUG00000013307)	11	16,592,620 - 16,613,412 on strand +	serine/threonine kinase receptor associated protein
	EPS8 (ENSMMUG00000020431)	11	16,315,434 - 16,488,205 on strand -	epidermal growth factor receptor kinase substrate 8
	PTPRO (ENSMMUG00000032109)	11	16,017,713 - 16,292,211 on strand +	protein tyrosine phosphatase, receptor type O
	RERG (ENSMMUG00000010460)	11	15,797,138 - 15,911,674 on strand -	RAS like estrogen regulated growth inhibitor
	ERP27 (ENSMMUG00000018030)	11	15,595,714 - 15,623,586 on strand -	endoplasmic reticulum protein 27
	ENSMMUG00000047247	11	15,561,170 - 15,567,277 on strand -
	ART4 (ENSMMUG00000012789)	11	15,500,800 - 15,518,338 on strand -	ADP-ribosyltransferase 4
	SMCO3 (ENSMMUG00000019298)	11	15,479,369 - 15,489,036 on strand -	single-pass membrane protein with coiled-coil domains 3
	C12orf60 (ENSMMUG00000012788)	11	15,478,562 - 15,498,729 on strand +	chromosome 12 open reading frame 60
	WBP11 (ENSMMUG00000019299)	11	15,456,794 - 15,475,985 on strand -	WW domain binding protein 11
	H2AFJ (ENSMMUG00000018013)	11	15,446,932 - 15,447,321 on strand +	H2A histone family member J
	HIST1H4F (ENSMMUG00000032119)	11	15,443,227 - 15,443,538 on strand -	histone cluster 1, H4f
	ENSMMUG00000040407	11	15,269,525 - 15,271,009 on strand -
	PLBD1 (ENSMMUG00000003665)	11	15,181,605 - 15,239,435 on strand -	phospholipase B domain containing 1
	ENSMMUG00000003664	11	15,064,298 - 15,180,787 on strand +
	GRIN2B (ENSMMUG00000019112)	11	14,231,741 - 14,652,226 on strand -	glutamate ionotropic receptor NMDA type subunit 2B
	EMP1 (ENSMMUG00000017638)	11	13,867,382 - 13,889,082 on strand +	epithelial membrane protein 1
	GSG1 (ENSMMUG00000017637)	11	13,758,637 - 13,777,308 on strand -	germ cell associated 1
	ENSMMUG00000042439	11	13,720,208 - 13,757,269 on strand +
	FAM234B (ENSMMUG00000017636)	11	13,720,146 - 13,811,554 on strand +	family with sequence similarity 234 member B
	Mouse
	Nome do Gene	Cromossomo	Distancia	Nome da Proteína
	Plcz1 (ENSMUSG00000030230)	6	139,989,673 - 140,041,457 on strand -	phospholipase C, zeta 1
	Pik3c2g (ENSMUSG00000108684)	6	139,841,691 - 139,967,943 on strand +	phosphatidylinositol 3-kinase, C2 domain containing, gamma polypeptide
	Pik3c2g (ENSMUSG00000030228)	6	139,587,221 - 139,969,284 on strand +	phosphatidylinositol 3-kinase, C2 domain containing, gamma polypeptide
	Rergl (ENSMUSG00000092164)	6	139,492,973 - 139,501,976 on strand -	RERG/RAS-like
	Igbp1b (ENSMUSG00000046717)	6	138,657,089 - 138,658,544 on strand -	immunoglobulin (CD79A) binding protein 1b
	Lmo3 (ENSMUSG00000030226)	6	138,362,918 - 138,581,968 on strand -	LIM domain only 3
	Mgst1 (ENSMUSG00000008540)	6	138,140,316 - 138,156,755 on strand +	microsomal glutathione S-transferase
	Slc15a5 (ENSMUSG00000044378)	6	137,983,586 - 138,079,916 on strand -	solute carrier family 15, member 5
	Dera (ENSMUSG00000030225)	6	137,754,546 - 137,857,340 on strand +	deoxyribose-phosphate aldolase (putative)
	Strap (ENSMUSG00000030224)	6	137,735,078 - 137,751,932 on strand +	serine/threonine kinase receptor associated protein
	Eps8 (ENSMUSG00000015766)	6	137,477,245 - 137,654,876 on strand -	epidermal growth factor receptor pathway substrate 8
	Ptpro (ENSMUSG00000030223)	6	137,252,319 - 137,463,233 on strand +	protein tyrosine phosphatase, receptor type, O
	Rerg (ENSMUSG00000030222)	6	137,054,825 - 137,170,497 on strand -	RAS-like, estrogen-regulated, growth-inhibitor
	Pde6h (ENSMUSG00000064330)	6	136,923,832 - 136,968,865 on strand +	phosphodiesterase 6H, cGMP-specific, cone, gamma
	Arhgdib (ENSMUSG00000030220)	6	136,923,655 - 136,941,899 on strand -	Rho, GDP dissociation inhibitor (GDI) beta
	Erp27 (ENSMUSG00000030219)	6	136,907,311 - 136,922,180 on strand -	endoplasmic reticulum protein 27
	Mgp (ENSMUSG00000030218)	6	136,872,435 - 136,875,823 on strand -	matrix Gla protein
	Art4 (ENSMUSG00000030217)	6	136,848,451 - 136,857,733 on strand -	ADP-ribosyltransferase 4
	Smco3 (ENSMUSG00000043298)	6	136,829,927 - 136,835,452 on strand -	single-pass membrane protein with coiled-coil domains 3
	BC049715 (ENSMUSG00000047515)	6	136,827,626 - 136,840,662 on strand +	cDNA sequence BC049715
	Wbp11 (ENSMUSG00000030216)	6	136,813,654 - 136,828,233 on strand -	WW domain binding protein 11
	H2afj (ENSMUSG00000060032)	6	136,808,244 - 136,810,074 on strand +	H2A histone family, member J
	Hist4h4 (ENSMUSG00000096010)	6	136,801,553 - 136,804,415 on strand -	histone cluster 4, H4
	Gucy2c (ENSMUSG00000042638)	6	136,697,284 - 136,781,765 on strand -	guanylate cyclase 2c
	Plbd1 (ENSMUSG00000030214)	6	136,612,070 - 136,661,928 on strand -	phospholipase B domain containing 1 [
	Atf7ip (ENSMUSG00000030213)	6	136,506,167 - 136,610,862 on strand +	activating transcription factor 7 interacting protein
	E330021D16Rik (ENSMUSG00000045291)	6	136,400,317 - 136,415,569 on strand -	RIKEN cDNA E330021D16 gene
	Gm8994 (ENSMUSG00000094973)	6	136,327,539 - 136,329,983 on strand +	predicted gene 8994
	Grin2b (ENSMUSG00000030209)	6	135,713,233 - 136,173,511 on strand -	glutamate receptor, ionotropic, NMDA2B (epsilon 2)
	Emp1 (ENSMUSG00000030208)	6	135,362,545 - 135,383,173 on strand +	epithelial membrane protein 1
	Pbp2 (ENSMUSG00000047104)	6	135,309,127 - 135,310,405 on strand -	phosphatidylethanolamine binding protein 2
	Guinea Pig
	Nome do Gene	Cromossomo	Distancia	Nome da Proteína
	PLCZ1 (ENSCPOG00000006656)	scaffold_28	12,120,960 - 12,163,409 on strand -	phospholipase C zeta 1
	PIK3C2G (ENSCPOG00000007924)	scaffold_28	11,804,371 - 12,093,521 on strand +	phosphatidylinositol-4-phosphate 3-kinase catalytic subunit type 2 gamma
	RERGL (ENSCPOG00000019470)	scaffold_28	11,650,255 - 11,658,965 on strand -	RERG like
	LMO3 (ENSCPOG00000000364)	scaffold_28	10,483,755 - 10,531,904 on strand -	LIM domain only 3
	MGST1 (ENSCPOG00000011714)	scaffold_28	10,302,945 - 10,312,021 on strand +	microsomal glutathione S-transferase 1
	SLC15A5 (ENSCPOG00000021614)	scaffold_28	10,133,253 - 10,215,353 on strand -	solute carrier family 15 member 5
	DERA (ENSCPOG00000001177)	scaffold_28	9,897,206 - 9,973,751 on strand +	deoxyribose-phosphate aldolase
	STRAP (ENSCPOG00000001176)	scaffold_28	9,836,020 - 9,857,248 on strand +	serine/threonine kinase receptor associated protein
	ENSCPOG00000019388	scaffold_28	9,751,122 - 9,751,313 on strand -
	EPS8 (ENSCPOG00000012163)	scaffold_28	9,580,474 - 9,625,778 on strand -	epidermal growth factor receptor pathway substrate 8
	PTPRO (ENSCPOG00000014389)	scaffold_28	9,348,486 - 9,558,016 on strand +	protein tyrosine phosphatase, receptor type O
	ENSCPOG00000023174	scaffold_28	9,323,814 - 9,324,134 on strand +
	RERG (ENSCPOG00000000528)	scaffold_28	9,147,912 - 9,159,798 on strand -	RAS like estrogen regulated growth inhibitor
	PDE6H (ENSCPOG00000025430)	scaffold_28	9,040,834 - 9,044,218 on strand +	phosphodiesterase 6H
	ARHGDIB (ENSCPOG00000000298)	scaffold_28	8,998,349 - 9,006,132 on strand -	Rho GDP dissociation inhibitor beta
	ERP27 (ENSCPOG00000000297)	scaffold_28	8,980,070 - 8,996,980 on strand -	endoplasmic reticulum protein 27
	MGP (ENSCPOG00000005250)	scaffold_28	8,941,903 - 8,944,822 on strand -	matrix Gla protein
	ART4 (ENSCPOG00000005245)	scaffold_28	8,904,262 - 8,913,809 on strand -	ADP-ribosyltransferase 4
	C12orf60 (ENSCPOG00000027242)	scaffold_28	8,898,367 - 8,899,098 on strand +	chromosome 12 open reading frame 60
	ENSCPOG00000005237	scaffold_28	8,867,340 - 8,879,910 on strand -
	H2AFJ (ENSCPOG00000021529)	scaffold_28	8,855,670 - 8,856,059 on strand +	H2A histone family member J
	ENSCPOG00000024453	scaffold_28	8,852,527 - 8,852,838 on strand -
	Gucy2c (ENSCPOG00000008513)	scaffold_28	8,747,349 - 8,824,942 on strand -	Cavia porcellus guanylate cyclase 2c (Gucy2c), mRNA.
	PLBD1 (ENSCPOG00000014977)	scaffold_28	8,637,072 - 8,683,271 on strand -	phospholipase B domain containing 1 [
	ATF7IP (ENSCPOG00000014973)	scaffold_28	8,550,835 - 8,632,219 on strand +	activating transcription factor 7 interacting protein
	GRIN2B (ENSCPOG00000006083)	scaffold_28	7,623,441 - 7,902,020 on strand -	glutamate ionotropic receptor NMDA type subunit 2B
	EMP1 (ENSCPOG00000012346)	scaffold_28	7,307,621 - 7,310,656 on strand +	epithelial membrane protein 1
	GSG1 (ENSCPOG00000001265)	scaffold_28	7,161,616 - 7,176,291 on strand -	germ cell associated 1
	FAM234B (ENSCPOG00000001262)	scaffold_28	7,130,265 - 7,157,932 on strand +	family with sequence similarity 234 member B
	HEBP1 (ENSCPOG00000013516)	scaffold_28	7,064,154 - 7,087,187 on strand -	heme binding protein 1
	GPRC5D (ENSCPOG00000027374)	scaffold_28	7,037,601 - 7,045,380 on strand -	G protein-coupled receptor class C group 5 member D
	Dog
	Nome do gene	Cromossomo	Distância	Nome da Proteína
	CAPZA3 (ENSCAFG00000012506)	27	28,362,120 - 28,363,019 on strand -	capping actin protein of muscle Z-line alpha subunit 3
	PLCZ1 (ENSCAFG00000012538)	27	28,363,792 - 28,419,255 on strand +	phospholipase C zeta 1
	PIK3C2G (ENSCAFG00000012564)	27	28,446,967 - 28,818,658 on strand -	phosphatidylinositol-4-phosphate 3-kinase catalytic subunit type 2 gamma
	RERGL (ENSCAFG00000012586)	27	28,943,929 - 28,953,337 on strand +	RERG like
	ENSCAFG00000012592	27	29,088,679 - 29,090,265 on strand +
	LMO3 (ENSCAFG00000012610)	27	30,153,135 - 30,208,572 on strand +	LIM domain only 3
	MGST1 (ENSCAFG00000012619)	27	30,369,668 - 30,392,054 on strand -	microsomal glutathione S-transferase 1
	SLC15A5 (ENSCAFG00000012622)	27	30,452,346 - 30,533,873 on strand +	solute carrier family 15 member 5
	DERA (ENSCAFG00000012635)	27	30,675,334 - 30,740,097 on strand -	deoxyribose-phosphate aldolase
	STRAP (ENSCAFG00000012679)	27	30,798,838 - 30,817,271 on strand -	serine/threonine kinase receptor associated protein
	EPS8 (ENSCAFG00000012724)	27	30,951,397 - 31,072,844 on strand +	epidermal growth factor receptor pathway substrate 8
	PTPRO (ENSCAFG00000012789)	27	31,082,289 - 31,321,894 on strand -	protein tyrosine phosphatase, receptor type O
	RERG (ENSCAFG00000012854)	27	31,413,308 - 31,528,921 on strand +	RAS like estrogen regulated growth inhibitor
	PDE6H (ENSCAFG00000012874)	27	31,640,667 - 31,664,764 on strand -	phosphodiesterase 6H
	ARHGDIB (ENSCAFG00000012883)	27	31,662,896 - 31,683,590 on strand +	Rho GDP dissociation inhibitor beta
	ERP27 (ENSCAFG00000012892)	27	31,682,927 - 31,703,937 on strand +	endoplasmic reticulum protein 27
	ENSCAFG00000012963	27	31,735,326 - 31,738,744 on strand +
	ART4 (ENSCAFG00000012972)	27	31,775,789 - 31,785,945 on strand +	ADP-ribosyltransferase 4
	C12orf60 (ENSCAFG00000012974)	27	31,792,144 - 31,792,875 on strand -	chromosome 12 open reading frame 60
	SMCO3 (ENSCAFG00000012980)	27	31,802,393 - 31,803,070 on strand +	single-pass membrane protein with coiled-coil domains 3
	WBP11 (ENSCAFG00000012926)	27	31,807,750 - 31,821,147 on strand +	WW domain binding protein 11
	H2AFJ (ENSCAFG00000012984)	27	31,835,623 - 31,836,012 on strand -	H2A histone family member J [
	ENSCAFG00000012989	27	31,840,011 - 31,840,319 on strand +
	GUCY2C (ENSCAFG00000013037)	27	31,917,604 - 31,990,025 on strand +	guanylate cyclase 2C
	PLBD1 (ENSCAFG00000013089)	27	32,031,303 - 32,081,805 on strand +	phospholipase B domain containing 1
	ATF7IP (ENSCAFG00000013106)	27	32,086,802 - 32,195,498 on strand -	activating transcription factor 7 interacting protein
	GRIN2B (ENSCAFG00000013148)	27	32,471,153 - 32,877,656 on strand +	Glutamate receptor ionotropic, NMDA 2B
	EMP1 (ENSCAFG00000031033)	27	33,177,639 - 33,184,332 on strand -	epithelial membrane protein 1
	GSG1 (ENSCAFG00000013186)	27	33,286,552 - 33,302,370 on strand +	germ cell associated 1
	FAM234B (ENSCAFG00000013198)	27	33,302,713 - 33,338,139 on strand -	family with sequence similarity 234 member B
	HEBP1 (ENSCAFG00000013209)	27	33,373,646 - 33,399,322 on strand +	heme binding protein 1
	Megabat
	Nome do Gene	Cromossomo	Distância	Nome da Proteína
	EPS8 (ENSPVAG00000013327)	GeneScaffold_303	649,498 - 708,352 on strand -	epidermal growth factor receptor pathway substrate 8
	PTPRO (ENSPVAG00000013322)	GeneScaffold_303
	RERG (ENSPVAG00000013319)	GeneScaffold_303	331,105 - 390,762 on strand -	RAS like estrogen regulated growth inhibitor
	PDE6H (ENSPVAG00000013318)	GeneScaffold_303	258,937 - 262,504 on strand +	phosphodiesterase 6H
	ARHGDIB (ENSPVAG00000013316)	GeneScaffold_303	231,119 - 238,877 on strand -	Rho GDP dissociation inhibitor beta
	ERP27 (ENSPVAG00000013314)	GeneScaffold_303	212,585 - 229,595 on strand -	endoplasmic reticulum protein 27
	MGP (ENSPVAG00000013312)	GeneScaffold_303	180,265 - 183,469 on strand -	matrix Gla protein
	ART4 (ENSPVAG00000013309)	GeneScaffold_303	142,818 - 153,702 on strand -	ADP-ribosyltransferase 4
	SMCO3 (ENSPVAG00000013307)	GeneScaffold_303	128,333 - 129,010 on strand -	single-pass membrane protein with coiled-coil domains 3
	WBP11 (ENSPVAG00000013305)	GeneScaffold_303	112,834 - 124,590 on strand -	WW domain binding protein 11
	H2AFJ (ENSPVAG00000013303)	GeneScaffold_303	99,501 - 99,854 on strand +	H2A histone family member J
	GUCY2C (ENSPVAG00000013293)	GeneScaffold_303	17,840 - 76,063 on strand -	guanylate cyclase 2C
	Microbat
	Nome do gene	Cromossomo	Distancia	Nome da Proteína
	CAPZA3 (ENSMLUG00000009150)	GL429777	16,054,318 - 16,055,400 on strand +	capping actin protein of muscle Z-line alpha subunit 3
	PLCZ1 (ENSMLUG00000017203)	GL429777	16,010,528 - 16,052,588 on strand -	phospholipase C zeta 1
	PIK3C2G (ENSMLUG00000017194)	GL429777	15,749,099 - 15,996,771 on strand +	phosphatidylinositol-4-phosphate 3-kinase catalytic subunit type 2 gamma
	ENSMLUG00000022198	GL429777	15,709,346 - 15,709,717 on strand -	Uncharacterized protein
	RERGL (ENSMLUG00000013060)	GL429777	15,623,517 - 15,633,140 on strand -	RERG like
	LMO3 (ENSMLUG00000029362)	GL429777	14,817,282 - 14,873,349 on strand -	LIM domain only 3
	MGST1 (ENSMLUG00000002358)	GL429777	14,669,723 - 14,676,194 on strand +	microsomal glutathione S-transferase 1
	SLC15A5 (ENSMLUG00000014780)	GL429777	14,537,175 - 14,613,242 on strand -	solute carrier family 15 member 5
	DERA (ENSMLUG00000002790)	GL429777	14,345,337 - 14,409,159 on strand +	deoxyribose-phosphate aldolase
	STRAP (ENSMLUG00000002797)	GL429777	14,287,573 - 14,304,578 on strand +	serine/threonine kinase receptor associated protein
	EPS8 (ENSMLUG00000015815)	GL429777	14,043,176 - 14,111,163 on strand -	epidermal growth factor receptor pathway substrate 8
	ENSMLUG00000015781	GL429777	13,934,069 - 14,027,457 on strand +	Uncharacterized protein
	RERG (ENSMLUG00000015778)	GL429777	13,665,111 - 13,676,041 on strand -	RAS like estrogen regulated growth inhibitor
	PDE6H (ENSMLUG00000025996)	GL429777	13,592,478 - 13,597,329 on strand +	phosphodiesterase 6H
	ARHGDIB (ENSMLUG00000006248)	GL429777	13,559,412 - 13,569,113 on strand -	Rho GDP dissociation inhibitor beta
	ERP27 (ENSMLUG00000006242)	GL429777	13,538,216 - 13,557,923 on strand -	endoplasmic reticulum protein 27
	MGP (ENSMLUG00000006238)	GL429777	13,496,369 - 13,499,662 on strand -	matrix Gla protein
	ART4 (ENSMLUG00000006235)	GL429777	13,459,573 - 13,468,582 on strand -	ADP-ribosyltransferase 4
	C12orf60 (ENSMLUG00000015212)	GL429777 :	13,456,304 - 13,457,035 on strand +	chromosome 12 open reading frame 60
	SMCO3 (ENSMLUG00000025842)	GL429777	13,446,625 - 13,447,302 on strand -	single-pass membrane protein with coiled-coil domains 3
	ENSMLUG00000015216	GL429777	13,429,256 - 13,442,516 on strand -	Uncharacterized protein
	GUCY2C (ENSMLUG00000003624)	GL429777	13,338,470 - 13,406,758 on strand -	guanylate cyclase 2C
	PLBD1 (ENSMLUG00000003621)	GL429777	13,260,375 - 13,312,198 on strand -	phospholipase B domain containing 1 [
	ATF7IP (ENSMLUG00000003611)	GL429777	13,205,868 - 13,255,300 on strand +	activating transcription factor 7 interacting protein
	GRIN2B (ENSMLUG00000009625)	GL429777	12,459,414 - 12,638,766 on strand -	glutamate ionotropic receptor NMDA type subunit 2B [
	EMP1 (ENSMLUG00000012047)	GL429777	12,190,627 - 12,193,754 on strand +	epithelial membrane protein 1
	GSG1 (ENSMLUG00000012032)	GL429777	12,072,170 - 12,078,915 on strand -	germ cell associated 1
	FAM234B (ENSMLUG00000012022)	GL429777	12,045,927 - 12,068,313 on strand +	family with sequence similarity 234 member B
	HEBP1 (ENSMLUG00000003179)	GL429777	12,005,249 - 12,025,939 on strand -	heme binding protein 1
	GPRC5D (ENSMLUG00000003175)	GL429777	11,980,922 - 11,986,888 on strand -	G protein-coupled receptor class C group 5 member D
	ENSMLUG00000026608	GL429777	11,969,908 - 11,971,107 on strand -	Ferritin
	Chicken
	Nome do gene	Cromossomo	Distância	Nome da Proteína
	SLC17A8 (ENSGALG00000041122)	1	47,308,619 - 47,334,316 on strand +	solute carrier family 17 member 8
	NR1H4 (ENSGALG00000011594)	1	47,358,279 - 47,391,411 on strand +	bile acid receptor [
	GAS2L3 (ENSGALG00000028373)	1	47,393,195 - 47,407,557 on strand +	Gallus gallus growth arrest-specific 2 like 3
	ANO4 (ENSGALG00000011614)	1	47,513,533 - 47,631,233 on strand +	anoctamin 4
	SLC5A8 (ENSGALG00000011633)	1	47,637,919 - 47,660,352 on strand -	solute carrier family 5 member 8
	UTP20 (ENSGALG00000011643)	1	47,672,512 - 47,732,097 on strand +	UTP20, small subunit processome component
	ARL1 (ENSGALG00000011651)	1	47,732,183 - 47,737,782 on strand -	ADP-ribosylation factor-like protein 1
	ENSGALG00000011662	1	47,737,682 - 47,784,522 on strand -
	CNOT4 (ENSGALG00000011682)	1	47,800,013 - 47,869,940 on strand +	Gallus gallus CCR4-NOT transcription complex, subunit 4 (CNOT4), mRNA.
	ENSGALG00000011717	1	47,884,753 - 47,909,098 on strand +
	STRA8 (ENSGALG00000011722)	1	47,914,186 - 47,928,240 on strand -	stimulated by retinoic acid 8
	WDR91 (ENSGALG00000011724)	1	47,929,076 - 47,944,077 on strand +	Gallus gallus WD repeat domain 91 (WDR91), mRNA.
	AGBL3 (ENSGALG00000011727)	1	47,963,625 - 47,974,613 on strand -	ATP/GTP binding protein like 3
	PDE6H (ENSGALG00000025735)	1	47,994,367 - 48,000,190 on strand -	Gallus gallus phosphodiesterase 6H, cGMP-specific, cone, gamma (PDE6H), mRNA.
	ARHGDIB (ENSGALG00000011738)	1	48,011,198 - 48,019,508 on strand +	Gallus gallus Rho GDP dissociation inhibitor (GDI) beta (ARHGDIB), mRNA.
	ERP27 (ENSGALG00000011739)	1	48,026,693 - 48,037,932 on strand +	endoplasmic reticulum protein 27
	MGP (ENSGALG00000011740)	1	48,052,894 - 48,058,138 on strand +	Gallus gallus matrix Gla protein (MGP), mRNA.
	OC3 (ENSGALG00000028560)	1	48,061,738 - 48,067,659 on strand +	Gallus gallus osteocalcin-like protein OC3 (OC3), mRNA.
	ART4 (ENSGALG00000011742)	1	48,069,970 - 48,074,563 on strand +	Gallus gallus ADP-ribosyltransferase 4 (Dombrock blood group) (ART4), mRNA
	SMCO3 (ENSGALG00000011743)	1	48,076,790 - 48,077,467 on strand +	single-pass membrane protein with coiled-coil domains 3
	WBP11 (ENSGALG00000011745)	1	48,081,434 - 48,091,448 on strand +	WW domain binding protein 11
	ENSGALG00000039794	1	48,091,388 - 48,092,200 on strand -
	ENSGALG00000011747	1	48,093,690 - 48,094,445 on strand +
	HIST1H2B7 (ENSGALG00000039722)	1	48,095,494 - 48,095,874 on strand -	Gallus gallus histone cluster 1, H2B-VII (similar to human histone cluster 1, class H2B, member N) (HIST1H2B7), mRNA
	ENSGALG00000033191	1	48,099,109 - 48,099,504 on strand -
	HIST1H46L2 (ENSGALG00000032272)	1	48,099,163 - 48,099,621 on strand +	Gallus gallus histone cluster 1, H4-IV, germinal H4-like 2 (similar to human histone cluster 1, class H4 genes) (HIST1H46L2), mRNA
	HIST1H3H (ENSGALG00000043062)	1	48,100,497 - 48,100,907 on strand -	histone cluster 1, H3h
	HIST1H3H (ENSGALG00000040303)	1	48,101,741 - 48,102,151 on strand +	histone cluster 1, H3h
	HIST1H46L2 (ENSGALG00000035445)	1	48,102,824 - 48,103,259 on strand -	Gallus gallus histone cluster 1, H4-IV, germinal H4-like 2 (similar to human histone cluster 1, class H4 genes) (HIST1H46L2), mRNA.
	ENSGALG00000036483	1	48,102,939 - 48,103,334 on strand +
	ENSGALG00000030658	1	48,110,522 - 48,111,180 on strand +	Gallus gallus histone H2A-IV-like (LOC101749238), mRNA.
	Turkey
	Nome do gene	Cromossomo	Distancia	Nome da Proteína
	NR1H4 (ENSMGAG00000011690)	1	48,126,689 - 48,157,796 on strand +	nuclear receptor subfamily 1 group H member 4
	GAS2L3 (ENSMGAG00000011632)	1	48,162,496 - 48,175,518 on strand +	growth arrest specific 2 like 3
	ANO4 (ENSMGAG00000011699)	1	48,287,574 - 48,392,491 on strand +	anoctamin 4
	SLC5A8 (ENSMGAG00000011713)	1	48,398,565 - 48,420,840 on strand -	solute carrier family 5 member 8
	UTP20 (ENSMGAG00000011726)	1	48,433,614 - 48,494,150 on strand +	UTP20, small subunit processome component [
	ARL1 (ENSMGAG00000011748)	1	48,494,360 - 48,498,998 on strand -	ADP ribosylation factor like GTPase 1
	NUP205 (ENSMGAG00000011752)	1	48,501,444 - 48,545,743 on strand -	nucleoporin 205
	CNOT4 (ENSMGAG00000011788)	1	48,591,669 - 48,630,402 on strand +	CCR4-NOT transcription complex subunit 4 [
	ENSMGAG00000011766	1	48,653,390 - 48,669,488 on strand +	Uncharacterized protein
	STRA8 (ENSMGAG00000011772)	1	48,674,514 - 48,688,285 on strand -	stimulated by retinoic acid 8
	WDR91 (ENSMGAG00000011777)	1	48,689,606 - 48,703,961 on strand +	WD repeat domain 91
	ENSMGAG00000017358	1	48,707,997 - 48,708,281 on strand -
	AGBL3 (ENSMGAG00000011798)	1	48,725,384 - 48,735,293 on strand -	ATP/GTP binding protein like 3
	PDE6H (ENSMGAG00000011801)	1	48,758,334 - 48,764,158 on strand -	phosphodiesterase 6H
	ARHGDIB (ENSMGAG00000011805)	1	48,775,111 - 48,783,322 on strand +	Rho GDP dissociation inhibitor beta
	ENSMGAG00000011811	1	48,791,996 - 48,803,368 on strand +
	MGP (ENSMGAG00000011815)	1	48,818,495 - 48,823,844 on strand +	matrix Gla protein
	ART4 (ENSMGAG00000011827)	1	48,836,019 - 48,840,594 on strand +	ADP-ribosyltransferase 4
	ENSMGAG00000015702	1	48,839,719 - 48,839,988 on strand -	Uncharacterized protein
	SMCO3 (ENSMGAG00000011828)	1	48,842,844 - 48,843,521 on strand +	single-pass membrane protein with coiled-coil domains 3
	WBP11 (ENSMGAG00000011831)	1	48,845,871 - 48,855,339 on strand +	WW domain binding protein 11
	ENSMGAG00000011849	1	48,879,658 - 48,880,601 on strand +	Uncharacterized protein [
	ENSMGAG00000007950	1	48,883,957 - 48,884,425 on strand +
	ENSMGAG00000015705	1	48,885,188 - 48,885,499 on strand -
	ENSMGAG00000015706	1	48,898,157 - 48,898,537 on strand +	Histone H2B
	HIST1H4H (ENSMGAG00000015703)	1	48,904,847 - 48,905,158 on strand +	histone cluster 1, H4h [
	ENSMGAG00000015708	1	48,905,395 - 48,905,775 on strand -	Histone H2B
	ENSMGAG00000017290	1	48,906,321 - 48,906,524 on strand -	Histone H4
	ENSMGAG00000011852	1	48,908,598 - 49,001,123 on strand -	Uncharacterized protein
	ENSMGAG00000015710	1	48,925,759 - 48,926,070 on strand +
	ENSMGAG00000011853	1	48,927,351 - 48,944,570 on strand +
	Chinese Turtle
	Nome do Gene	Cromossomo	Distância	Nome da Proteína
	NR1H4 (ENSPSIG00000005774)	JH209446.1	251,336 - 304,429 on strand +	nuclear receptor subfamily 1 group H member 4
	GAS2L3 (ENSPSIG00000007108)	JH209446.1	310,024 - 348,425 on strand +	growth arrest specific 2 like 3
	ANO4 (ENSPSIG00000007612)	JH209446.1	427,557 - 685,074 on strand +	anoctamin 4
	SLC5A8 (ENSPSIG00000013997)	JH209446.1	695,107 - 736,317 on strand -	solute carrier family 5 member 8
	UTP20 (ENSPSIG00000016689)	JH209446.1	781,171 - 858,937 on strand +	UTP20, small subunit processome component
	ARL1 (ENSPSIG00000006539)	JH209446.1	860,096 - 862,688 on strand -	ADP ribosylation factor like GTPase 1
	NUP205 (ENSPSIG00000006899)	JH209446.1	878,325 - 967,528 on strand -	nucleoporin 205
	CNOT4 (ENSPSIG00000011256)	JH209446.1	1,012,182 - 1,103,828 on strand +	CCR4-NOT transcription complex subunit 4
	ENSPSIG00000012985	JH209446.1	1,176,969 - 1,204,137 on strand +
	STRA8 (ENSPSIG00000013824)	JH209446.	1,221,745 - 1,247,268 on strand -	stimulated by retinoic acid 8
	WDR91 (ENSPSIG00000014113)	JH209446.1	1,255,162 - 1,277,695 on strand +	WD repeat domain 91
	TMEM140 (ENSPSIG00000015467)	JH209446.1	1,259,817 - 1,287,021 on strand -	transmembrane protein 140
	AGBL3 (ENSPSIG00000015627)	JH209446.1	1,325,810 - 1,361,392 on strand -	ATP/GTP binding protein like 3
	PDE6H (ENSPSIG00000016325)	JH209446.1	1,404,697 - 1,407,854 on strand -	phosphodiesterase 6H
	ARHGDIB (ENSPSIG00000016539)	JH209446.1	1,423,919 - 1,435,249 on strand +	Rho GDP dissociation inhibitor beta
	ENSPSIG00000003609	JH209446.1	1,439,318 - 1,455,831 on strand +
	MGP (ENSPSIG00000003615)	JH209446.1	1,490,030 - 1,497,527 on strand +	matrix Gla protein
	ART4 (ENSPSIG00000003662)	JH209446.1	1,527,077 - 1,530,562 on strand +	ADP-ribosyltransferase 4 (Dombrock blood group)
	ENSPSIG00000001381	JH209446.1	1,532,315 - 1,533,085 on strand -
	SMCO3 (ENSPSIG00000001390)	JH209446.1	1,540,162 - 1,540,833 on strand +	single-pass membrane protein with coiled-coil domains 3
	WBP11 (ENSPSIG00000003674)	JH209446.1	1,546,896 - 1,566,168 on strand +	WW domain binding protein 11
	ENSPSIG00000003689	JH209446.1	1,567,784 - 1,584,071 on strand +
	ENSPSIG00000001405	JH209446.1	1,589,961 - 1,590,416 on strand +
	ENSPSIG00000001368	JH209446.1	1,593,042 - 1,593,755 on strand +
	ENSPSIG00000003742	JH209446.1	1,594,638 - 1,596,394 on strand -
	ENSPSIG00000001382	JH209446.1	1,606,578 - 1,606,985 on strand -
	ENSPSIG00000003754	JH209446.1	1,613,090 - 1,613,704 on strand +
	ENSPSIG00000001422	JH209446.1	1,614,382 - 1,614,693 on strand -
	ENSPSIG00000001455	JH209446.1	1,621,469 - 1,621,858 on strand -
	ENSPSIG00000001472	JH209446.1	1,622,168 - 1,622,595 on strand +
	ENSPSIG00000001495	JH209446.1	1,642,263 - 1,642,583 on strand +
	Lizard
	Nome do gene	Cromossomo	Distância	Nome da Proteína
	ANO4 (ENSACAG00000012017)	5	28,385,435 - 28,443,669 on strand -	anoctamin 4
	ENSACAG00000012014	5	28,343,214 - 28,379,937 on strand +
	SLC5A8 (ENSACAG00000011810)	5	28,318,783 - 28,340,168 on strand +	solute carrier family 5 member 8
	UTP20 (ENSACAG00000011671)	5	28,223,299 - 28,302,376 on strand -	UTP20, small subunit processome component
	ARL1 (ENSACAG00000011602)	5	28,216,468 - 28,222,060 on strand +	ADP ribosylation factor like GTPase 1
	NUP205 (ENSACAG00000011264)	5	28,171,642 - 28,215,749 on strand +	nucleoporin 205
	POLR3H (ENSACAG00000011213)	5	28,163,022 - 28,169,024 on strand -	RNA polymerase III subunit H
	CNOT4 (ENSACAG00000011154)	5	28,085,500 - 28,160,480 on strand -	CCR4-NOT transcription complex subunit 4
	ENSACAG00000011027	5	28,006,124 - 28,044,724 on strand -
	STRA8 (ENSACAG00000011014)	5	27,969,423 - 27,998,089 on strand +	stimulated by retinoic acid 8
	WDR91 (ENSACAG00000010904)	5	27,941,160 - 27,964,468 on strand -	WD repeat domain 91
	TMEM140 (ENSACAG00000010897)	5	27,929,166 - 27,929,714 on strand +	transmembrane protein 140
	AGBL3 (ENSACAG00000010849)	5	27,857,234 - 27,915,974 on strand +	ATP/GTP binding protein like 3
	PDE6H (ENSACAG00000020931)	5	27,845,002 - 27,848,269 on strand +	phosphodiesterase 6H
	ARHGDIB (ENSACAG00000010811)	5	27,794,455 - 27,803,171 on strand -	Rho GDP dissociation inhibitor beta
	ERP27 (ENSACAG00000010795)	5	27,756,556 - 27,790,802 on strand -	endoplasmic reticulum protein 27
	MGP (ENSACAG00000010792)	5	27,709,526 - 27,723,015 on strand -	matrix Gla protein
	ENSACAG00000010784	5	27,684,518 - 27,685,294 on strand +
	SMCO3 (ENSACAG00000010786)	5	27,679,164 - 27,680,661 on strand -	single-pass membrane protein with coiled-coil domains 3
	WBP11 (ENSACAG00000010717)	5	27,656,127 - 27,673,259 on strand -	WW domain binding protein 11
	ENSACAG00000010716	5	27,642,827 - 27,643,234 on strand -
	ENSACAG00000028268	5	27,627,322 - 27,634,188 on strand -
	ENSACAG00000029320	5	27,600,388 - 27,623,484 on strand -
	APOLD1 (ENSACAG00000010710	5	27,598,925 - 27,599,569 on strand -	apolipoprotein L domain containing 1
	DDX47 (ENSACAG00000010648)	5	27,571,877 - 27,589,379 on strand -	DEAD-box helicase 47 [
	ENSACAG00000010644	5	27,524,193 - 27,540,301 on strand -
	ENSACAG00000022275	5	27,489,654 - 27,503,740 on strand +
	HEBP1 (ENSACAG00000010626)	5	27,471,543 - 27,484,767 on strand +	heme binding protein 1
	TCF20 (ENSACAG00000003634)	5	27,270,816 - 27,325,510 on strand -	transcription factor 20
	ENSACAG00000003662	5	27,251,473 - 27,253,490 on strand -
	ENSACAG00000003666	5	27,228,365 - 27,244,663 on strand +
	Frog
	Nome do gene	Cromossomo	Distancia	Nome da proteina
	ENSXETG00000032675	GL172795.1	30,616 - 60,227 on strand +
	ENSXETG00000025215	GL172795.1	80,528 - 82,442 on strand -
	arhgdib (ENSXETG00000002772)	GL172795.1	93,550 - 104,246 on strand +	Rho GDP dissociation inhibitor (GDI) beta
	ERP27 (ENSXETG00000032403)	GL172795.1	113,099 - 120,662 on strand +	endoplasmic reticulum protein 27
	mgp (ENSXETG00000025213)	GL172795.1	159,336 - 163,887 on strand +	matrix Gla protein
	wbp11 (ENSXETG00000002770)	GL172795.1	175,509 - 188,306 on strand +	WW domain binding protein 11
	ptx (ENSXETG00000002769)	GL172795.1	192,804 - 226,401 on strand +	pentraxin
	XB-GENE-5780408 (ENSXETG00000025212)	GL172795.1	230,113 - 232,181 on strand -	C-reactive protein, pentraxin-related
	ENSXETG00000002768	GL172795.1	239,287 - 240,312 on strand -
	crp.3 (ENSXETG00000025211)	GL172795.1	262,148 - 264,218 on strand +	C-reactive protein, pentraxin-related, gene 3
	josd2 (ENSXETG00000002767)	GL172795.1	272,859 - 279,727 on strand +	Josephin domain containing 2
	WFDC2 (ENSXETG00000033305)	GL172795.1	286,257 - 287,676 on strand -	WAP four-disulfide core domain 2
	twf2 (ENSXETG00000002765)	GL172795.1	296,387 - 332,438 on strand -	twinfilin actin binding protein 2
	GLYCTK (ENSXETG00000030358)	GL172795.1	332,628 - 340,933 on strand +	glycerate kinase
	ENSXETG00000030029	GL172795.1	350,312 - 397,717 on strand +
	bap1 (ENSXETG00000000091)	GL172795.1	398,710 - 410,678 on strand -	BRCA1 associated protein-1 (ubiquitin carboxy-terminal hydrolase)
	ENSXETG00000032120	GL172795.1	426,808 - 435,706 on strand +
	acy1.1 (ENSXETG00000000089)	GL172795.1	452,876 - 478,173 on strand -	aminoacylase 1, gene 1
	ENSXETG00000031804	GL172795.1	490,739 - 493,001 on strand -
	Tetraodon
	Nome do gene	Cromossomo	Distancia	Nome da proteina
	SMARCA4 (1 of many) (ENSTNIG00000004536)	18	4,542,554 - 4,553,024 on strand +	SWI/SNF related, matrix associated, actin dependent regulator of chromatin, subfamily a, member 4
	atg4da (ENSTNIG00000004535)	18	4,537,422 - 4,541,529 on strand +	autophagy related 4D, cysteine peptidase a
	mast1a (ENSTNIG00000004534)	18	4,515,746 - 4,531,776 on strand +	microtubule associated serine/threonine kinase 1a
	rnaseh2a (ENSTNIG00000004533)	18	4,487,850 - 4,489,996 on strand +	ribonuclease H2, subunit A
	sox10 (1 of many) (ENSTNIG00000004532)	18	4,482,563 - 4,484,506 on strand +	SRY (sex determining region Y)-box 10
	KCNJ4 (1 of many) (ENSTNIG00000004531)	18	4,468,600 - 4,470,308 on strand +	potassium voltage-gated channel subfamily J member 4
	ENSTNIG00000004530	18	4,453,206 - 4,453,826 on strand -
	ENSTNIG00000005519	18	4,444,514 - 4,446,414 on strand -
	pane1 (ENSTNIG00000001651)	18	4,437,647 - 4,440,080 on strand -	proliferation associated nuclear element
	mb (ENSTNIG00000005518)	18	4,434,930 - 4,436,456 on strand +	myoglobin
	serhl (ENSTNIG00000005517)	18	4,424,725 - 4,433,291 on strand -	serine hydrolase-like
	sept3 (ENSTNIG00000004228)	18	4,413,693 - 4,416,258 on strand -	septin 3
	atf7ip (ENSTNIG00000007160)	18	4,377,946 - 4,391,088 on strand -	activating transcription factor 7 interacting protein
	grin2bb (ENSTNIG00000005693)	18	4,330,808 - 4,355,150 on strand -	glutamate receptor, ionotropic, N-methyl D-aspartate 2B, genome duplicate b
	ENSTNIG00000019450	18	4,322,196 - 4,322,442 on strand +
	ERP27 (ENSTNIG00000005692)	18	4,316,513 - 4,320,026 on strand -	endoplasmic reticulum protein 27 [
	ENSTNIG00000005691	18	4,312,495 - 4,313,279 on strand -	Osteocalcin; Uncharacterized protein
	slc34a2a (ENSTNIG00000005690)	18	4,306,665 - 4,310,574 on strand +	solute carrier family 34 (type II sodium/phosphate cotransporter), member 2a
	ENSTNIG00000005689	18	4,301,589 - 4,302,257 on strand -	Claudin
	slc25a10 (1 of many) (ENSTNIG00000005688)	18	4,296,562 - 4,300,681 on strand -	solute carrier family 25 (mitochondrial carrier; dicarboxylate transporter), member 10
	ENSTNIG00000004108	18	4,287,180 - 4,288,079 on strand -	Chromosome 18 SCAF9219, whole genome shotgun sequenc
	ociad1 (ENSTNIG00000004107)	18	4,284,510 - 4,294,747 on strand -	OCIA domain containing 1
	ENSTNIG00000004106	18	4,278,082 - 4,279,412 on strand +
	ENSTNIG00000004105	18	4,271,114 - 4,277,080 on strand +	Uncharacterized protein
	fip1l1b (ENSTNIG00000004104)	18	4,256,760 - 4,263,202 on strand +	FIP1 like 1b (S. cerevisiae)
	kitb (ENSTNIG00000004103)	18	4,238,926 - 4,247,978 on strand -	v-kit Hardy-Zuckerman 4 feline sarcoma viral oncogene homolog b
	clockb (ENSTNIG00000004102)	18	4,224,224 - 4,234,270 on strand +	clock circadian regulator b
	smc2 (ENSTNIG00000004101)	18	4,205,060 - 4,213,239 on strand -	structural maintenance of chromosomes 2
	si:dkey-245p14.7 (ENSTNIG00000004100)	18	4,184,294 - 4,204,014 on strand +	si:dkey-245p14.7
	kdm4c (ENSTNIG00000004099)	18	4,164,316 - 4,181,844 on strand -	lysine (K)-specific demethylase 4C
	ptprdb (ENSTNIG00000004098)	18	4,126,690 - 4,159,217 on strand +	protein tyrosine phosphatase, receptor type, D, b
	Platyfish
	Nome do gene	Cromossomo	Distancia	Nome da proteina
	clockb (ENSXMAG00000017672)	JH556907.1	802,434 - 820,177 on strand -	clock circadian regulator b
	kitb (ENSXMAG00000017634)	JH556907.1	779,228 - 802,169 on strand +	v-kit Hardy-Zuckerman 4 feline sarcoma viral oncogene homolog b
	fip1l1b (ENSXMAG00000017620)	JH556907.1	757,512 - 766,487 on strand -	FIP1 like 1b (S. cerevisiae)
	ENSXMAG00000017619	JH556907.1	753,629 - 754,539 on strand -
	ENSXMAG00000017616	JH556907.1	751,470 - 753,355 on strand -
	chic2 (ENSXMAG00000017611)	JH556907.1	733,829 - 739,484 on strand +	cysteine-rich hydrophobic domain 2
	suz12b (ENSXMAG00000017579)	JH556907.1	718,511 - 733,121 on strand -	SUZ12 polycomb repressive complex 2b subunit
	sept3 (ENSXMAG00000017559)	JH556907.1	691,032 - 697,194 on strand -	septin 3
	atf7ip (ENSXMAG00000017555)	JH556907.1	646,390 - 657,857 on strand -	activating transcription factor 7 interacting protein
	grin2bb (ENSXMAG00000017530)	JH556907.1	522,810 - 607,427 on strand -	glutamate receptor, ionotropic, N-methyl D-aspartate 2B, genome duplicate b
	zgc:101679 (ENSXMAG00000017510)	JH556907.1	487,701 - 494,786 on strand -	coagulation factor VIII-associated 2
	emp1 (ENSXMAG00000017506)	JH556907.1	477,955 - 485,932 on strand +	epithelial membrane protein 1
	ENSXMAG00000017485	JH556907.1	457,759 - 467,964 on strand -
	rbfox2 (ENSXMAG00000017482)	JH556907.1	400,885 - 418,060 on strand -	RNA binding protein, fox-1 homolog (C. elegans) 2
	pde6h (ENSXMAG00000017481)	JH556907.1	391,917 - 392,269 on strand -	phosphodiesterase 6H, cGMP-specific, cone, gamma
	ERP27 (ENSXMAG00000017479)	JH556907.1	374,512 - 381,943 on strand -	endoplasmic reticulum protein 27
	ENSXMAG00000017477	JH556907.1	367,877 - 369,438 on strand -
	slc34a2a (ENSXMAG00000017450)	JH556907.1	355,281 - 364,584 on strand +	solute carrier family 34 (type II sodium/phosphate cotransporter), member 2a
	ociad1 (ENSXMAG00000017443)	JH556907.1	351,389 - 353,676 on strand -	OCIA domain containing 1
	utp6 (ENSXMAG00000017414)	JH556907.1	340,666 - 348,395 on strand -	UTP6, small subunit (SSU) processome component, homolog (yeast)
	rab11fip4b (ENSXMAG00000017397)	JH556907.1	226,096 - 254,040 on strand +	RAB11 family interacting protein 4 (class II) b
	ENSXMAG00000017396	JH556907.1	171,390 - 174,761 on strand +
	ENSXMAG00000017395	JH556907.1	127,847 - 168,553 on strand +
	PLPPR2 (1 of many) (ENSXMAG00000017379)	JH556907.1	65,184 - 100,512 on strand -	phospholipid phosphatase related 2
	pld6 (ENSXMAG00000017375)	JH556907.1	31,643 - 35,735 on strand -	phospholipase D family, member 6
	ENSXMAG00000017368	JH556907.1	17,826 - 26,640 on strand -
	ENSXMAG00000017345	JH556907.1	9,712 - 13,496 on strand -
	dand5 (ENSXMAG00000017343)	JH556907.1	1,412 - 4,035 on strand -	DAN domain family, member 5
	Medaka
	Nome do gene	Cromossomo	Distancia	Nome da proteina
	zgc:158803 (ENSORLG00000004110)	1	14,479,175 - 14,484,673 on strand +	zgc:158803
	pane1 (ENSORLG00000004119)	1	14,485,612 - 14,489,694 on strand +	proliferation associated nuclear element
	mb (ENSORLG00000004130)	1	14,494,882 - 14,496,661 on strand -	myoglobin
	serhl (ENSORLG00000004149)	1	14,499,390 - 14,508,088 on strand +	serine hydrolase-like
	sept3 (ENSORLG00000004172)	1	14,532,720 - 14,540,918 on strand +	septin 3
	ENSORLG00000004177	1	14,543,248 - 14,571,121 on strand -
	ENSORLG00000004183	1	14,599,626 - 14,600,015 on strand +
	grin2bb (ENSORLG00000004215)	1	14,654,509 - 14,749,186 on strand +	glutamate receptor, ionotropic, N-methyl D-aspartate 2B, genome duplicate b
	zgc:101679 (ENSORLG00000004242)	1	14,783,809 - 14,788,847 on strand +	coagulation factor VIII-associated 2
	emp1 (ENSORLG00000004256)	1	14,791,306 - 14,794,481 on strand -	epithelial membrane protein 1
	ENSORLG00000004261	1	14,807,423 - 14,809,363 on strand +
	ENSORLG00000004268	1	14,833,139 - 14,854,841
	rbfox2 (ENSORLG00000004279)	1	14,858,914 - 14,868,260 on strand +	RNA binding protein, fox-1 homolog (C. elegans) 2
	pde6h (1 of many) (ENSORLG00000004281)	1	14,873,547 - 14,873,999 on strand -	phosphodiesterase 6H, cGMP-specific, cone, gamma
	pde6h (1 of many) (ENSORLG00000004291)	1	14,876,993 - 14,878,501 on strand +	phosphodiesterase 6H, cGMP-specific, cone, gamma
	ERP27 (ENSORLG00000004311)	1	14,884,366 - 14,891,238 on strand +	endoplasmic reticulum protein 27
	ENSORLG00000004316	1	14,895,925 - 14,896,314 on strand +
	slc34a2a (ENSORLG00000004331)	1	14,903,636 - 14,912,229 on strand -	solute carrier family 34 (type II sodium/phosphate cotransporter), member 2a
	ociad1 (ENSORLG00000004352)	1	14,916,127 - 14,921,345 on strand +	OCIA domain containing 1
	chic2 (ENSORLG00000004366)	1	14,925,227 - 14,929,091 on strand +	cysteine-rich hydrophobic domain 2
	ENSORLG00000004374	1	14,933,796 - 14,936,965 on strand -
	ENSORLG00000004381	1	14,937,761 - 14,940,537 on strand -
	fip1l1b (ENSORLG00000004397)	1	14,942,343 - 14,950,183 on strand -	FIP1 like 1b (S. cerevisiae)
	ENSORLG00000004401	1	14,963,838 - 14,969,920 on strand +
	clockb (ENSORLG00000004495)	1	14,996,520 - 15,007,939 on strand -	clock circadian regulator b
	ENSORLG00000004506	1	15,018,961 - 15,019,230 on strand +
	smc2 (ENSORLG00000004556)	1	15,022,443 - 15,031,025 on strand +	structural maintenance of chromosomes 2
	si:dkey-245p14.7 (ENSORLG00000004593)	1	15,031,729 - 15,057,510 on strand -	si:dkey-245p14.7
	kdm4c (ENSORLG00000004619)	1	15,060,687 - 15,089,578 on strand +	lysine (K)-specific demethylase 4C
	ptprdb (ENSORLG00000004685)	1	15,107,681 - 15,174,433 on strand -	protein tyrosine phosphatase, receptor type, D, b
	tyrp1b (ENSORLG00000004723	1	15,396,420 - 15,404,728 on strand +	tyrosinase-related protein 1b

## Sheet: ARHGDIB
	ARGHDIB
	Coelacanth
	Nome do gene	Cromossomo	Distancia	Nome da proteina
	ARHGDIB (ENSLACG00000003630)	JH129627.1	90,417 - 96,015 on strand +	Rho GDP dissociation inhibitor beta
	MCHR1 (ENSLACG00000004683)	JH129627.1	134,136 - 136,462 on strand -
	MKL1 (ENSLACG00000005378)	JH129627.1	164,900 - 190,037 on strand -	megakaryoblastic leukemia (translocation) 1
	Human
	Nome do gene	Cromossomo	Distancia	Nome da proteina
	AEBP2 (ENSG00000139154)	12	19,404,045 - 19,720,801 on strand +	AE binding protein 2
	PLEKHA5 (ENSG00000052126)	12	19,129,752 - 19,376,400 on strand +	pleckstrin homology domain containing A5
	CAPZA3 (ENSG00000177938)	12	18,738,101 - 18,739,187 on strand +	capping actin protein of muscle Z-line alpha subunit 3
	PLCZ1 (ENSG00000139151)	12	18,683,169 - 18,738,057 on strand -	phospholipase C zeta 1
	PIK3C2G (ENSG00000139144)	12	18,247,614 - 18,648,416 on strand +	phosphatidylinositol-4-phosphate 3-kinase catalytic subunit type 2 gamma
	RERGL (ENSG00000111404)	12	18,080,869 - 18,320,107 on strand -	RERG like
	LMO3 (ENSG00000048540)	12	16,548,373 - 16,610,594 on strand -	LIM domain only 3
	MGST1 (ENSG00000008394)	12	16,347,142 - 16,609,259 on strand +	microsomal glutathione S-transferase 1
	SLC15A5 (ENSG00000188991)	12	16,188,485 - 16,277,685 on strand -	solute carrier family 15 member 5
	DERA (ENSG00000023697)	12	15,911,172 - 16,037,282 on strand +	deoxyribose-phosphate aldolase
	STRAP (ENSG00000023734)	12	15,882,391 - 15,903,478 on strand +	serine/threonine kinase receptor associated protein
	EPS8 (ENSG00000151491)	12	15,620,158 - 15,882,329 on strand -	epidermal growth factor receptor pathway substrate 8
	PTPRO (ENSG00000151490)	12	15,322,397 - 15,597,399 on strand +	protein tyrosine phosphatase, receptor type O
	RERG (ENSG00000134533)	12	15,107,783 - 15,348,675 on strand -	RAS like estrogen regulated growth inhibitor
	PDE6H (ENSG00000139053)	12	14,973,022 - 14,981,865 on strand +	phosphodiesterase 6H
	ARHGDIB (ENSG00000111348)	12	14,942,017 - 14,961,728 on strand -	Rho GDP dissociation inhibitor beta
	ERP27 (ENSG00000139055)	12	14,914,035 - 14,939,082 on strand -	endoplasmic reticulum protein 27
	MGP (ENSG00000111341)	12	14,881,181 - 14,885,926 on strand -	matrix Gla protein
	ART4 (ENSG00000111339)	12	14,825,569 - 14,843,495 on strand -	ADP-ribosyltransferase 4 (Dombrock blood group)
	SMCO3 (ENSG00000179256)	12	14,804,650 - 14,814,182 on strand -	single-pass membrane protein with coiled-coil domains 3
	C12orf60 (ENSG00000182993)	12	14,803,572 - 14,906,586 on strand +	chromosome 12 open reading frame 60
	WBP11 (ENSG00000084463)	12	14,784,579 - 14,803,540 on strand -	WW domain binding protein 11
	H2AFJ (ENSG00000246705)	12	14,774,383 - 14,778,002 on strand +	H2A histone family member J
	HIST4H4 (ENSG00000197837)	12	14,767,999 - 14,771,131 on strand -	histone cluster 4, H4
	GUCY2C (ENSG00000070019)	12	14,612,632 - 14,696,585 on strand -	guanylate cyclase 2C
	PLBD1 (ENSG00000121316)	12	14,503,661 - 14,568,349 on strand -	phospholipase B domain containing 1
	ATF7IP (ENSG00000171681)	12	14,365,632 - 14,502,935 on strand +	activating transcription factor 7 interacting protein
	GRIN2B (ENSG00000273079)	12	13,437,942 - 13,981,957 on strand -	glutamate ionotropic receptor NMDA type subunit 2B
	EMP1 (ENSG00000134531)	12	13,196,716 - 13,219,939 on strand +	epithelial membrane protein 1
	GSG1 (ENSG00000111305)	12	13,083,560 - 13,103,683 on strand -	germ cell associated 1
	FAM234B (ENSG00000084444)	12	13,044,284 - 13,142,521 on strand +	family with sequence similarity 234 member B
	Orangutan
	Nome do gene	Cromossomo	Distancia	Nome da proteina
	AEBP2 (ENSPPYG00000004345)	12	20,193,524 - 20,271,861 on strand +	AE binding protein 2
	PLEKHA5 (ENSPPYG00000004344)	12	19,881,294 - 20,121,654 on strand +	pleckstrin homology domain containing A5
	CAPZA3 (ENSPPYG00000004342)	12	19,469,404 - 19,470,303 on strand +	capping actin protein of muscle Z-line alpha subunit 3
	PLCZ1 (ENSPPYG00000004341)	12	19,413,810 - 19,469,150 on strand -	phospholipase C zeta 1
	RERGL (ENSPPYG00000004340)	12	18,795,612 - 18,804,093 on strand -	RERG like
	ENSPPYG00000004339	12	17,614,820 - 17,616,196 on strand +
	LMO3 (ENSPPYG00000004338)	12	17,139,629 - 17,202,462 on strand -	Pongo abelii LIM domain only 3 (rhombotin-like 2) (LMO3), transcript variant 2, mRNA.
	MGST1 (ENSPPYG00000004337)	12	16,958,480 - 16,978,502 on strand +	microsomal glutathione S-transferase 1
	SLC15A5 (ENSPPYG00000004336)	12	16,785,608 - 16,878,217 on strand -	solute carrier family 15 member 5
	DERA (ENSPPYG00000004335)	12	16,480,750 - 16,616,816 on strand +	deoxyribose-phosphate aldolase
	STRAP (ENSPPYG00000004334)	12	16,452,204 - 16,473,276 on strand +	serine/threonine kinase receptor associated protein
	EPS8 (ENSPPYG00000004333)	12	16,170,940 - 16,345,920 on strand -	Pongo abelii epidermal growth factor receptor pathway substrate 8
	PTPRO (ENSPPYG00000004332)	12	15,842,405 - 16,147,619 on strand +	protein tyrosine phosphatase, receptor type O
	RERG (ENSPPYG00000004331)	12	15,587,054 - 15,714,044 on strand -	RAS like estrogen regulated growth inhibitor
	PDE6H (ENSPPYG00000004330)	12	15,455,822 - 15,459,304 on strand +	phosphodiesterase 6H [
	ARHGDIB (ENSPPYG00000004329)	12	15,419,837 - 15,428,271 on strand -	Rho GDP dissociation inhibitor beta
	ERP27 (ENSPPYG00000004328)	12	15,392,448 - 15,416,289 on strand -	endoplasmic reticulum protein 27
	ENSPPYG00000004327	12	15,359,300 - 15,363,350 on strand -
	ART4 (ENSPPYG00000004326)	12	15,305,765 - 15,319,830 on strand -	ADP-ribosyltransferase 4
	C12orf60 (ENSPPYG00000004325)	12	15,299,318 - 15,300,052 on strand +	chromosome 12 open reading frame 60
	SMCO3 (ENSPPYG00000004324)	12	15,281,797 - 15,282,474 on strand -	single-pass membrane protein with coiled-coil domains 3
	WBP11 (ENSPPYG00000004323)	12	15,261,184 - 15,279,351 on strand -	WW domain binding protein 11
	H2AFJ (ENSPPYG00000004322)	12	15,249,269 - 15,249,658 on strand +	H2A histone family member J
	HIST2H4A (ENSPPYG00000004321)	12	15,245,577 - 15,245,888 on strand -	Histone H4
	GUCY2C (ENSPPYG00000004320)	12	15,092,220 - 15,175,731 on strand -	guanylate cyclase 2C
	PLBD1 (ENSPPYG00000004319)	12	14,937,163 - 15,021,061 on strand -	phospholipase B domain containing 1
	ATF7IP (ENSPPYG00000004318)	12	14,808,268 - 14,925,893 on strand +	activating transcription factor 7 interacting protein
	GRIN2B (ENSPPYG00000004317)	12	13,989,926 - 14,416,409 on strand -	glutamate ionotropic receptor NMDA type subunit 2B
	EMP1 (ENSPPYG00000004316)	12	13,647,140 - 13,665,587 on strand +	epithelial membrane protein 1
	GSG1 (ENSPPYG00000004315)	12	13,532,299 - 13,544,278 on strand -	germ cell associated 1
	FAM234B (ENSPPYG00000004314)	12	13,492,977 - 13,532,068 on strand +	family with sequence similarity 234 member B
	Mouse
	Nome do gene	Cromossomo	Distancia	Nome da proteina
	Capza3 (ENSMUSG00000041791)	6	140,041,252 - 140,042,778 on strand +	capping protein (actin filament) muscle Z-line, alpha 3
	Plcz1 (ENSMUSG00000030230)	6	139,989,673 - 140,041,457 on strand -	phospholipase C, zeta 1 [
	Pik3c2g (ENSMUSG00000108684)	6	139,841,691 - 139,967,943 on strand +	phosphatidylinositol 3-kinase, C2 domain containing, gamma polypeptide
	Pik3c2g (ENSMUSG00000030228)	6	139,587,221 - 139,969,284 on strand +	phosphatidylinositol 3-kinase, C2 domain containing, gamma polypeptide
	Rergl (ENSMUSG00000092164)	6	139,492,973 - 139,501,976 on strand -	RERG/RAS-like
	Igbp1b (ENSMUSG00000046717)	6	138,657,089 - 138,658,544 on strand -	immunoglobulin (CD79A) binding protein 1b
	Lmo3 (ENSMUSG00000030226)	6	138,362,918 - 138,581,968 on strand -	LIM domain only 3
	Mgst1 (ENSMUSG00000008540)	6	138,140,316 - 138,156,755 on strand +	microsomal glutathione S-transferase 1
	Slc15a5 (ENSMUSG00000044378)	6	137,983,586 - 138,079,916 on strand -	solute carrier family 15, member 5
	Dera (ENSMUSG00000030225)	6	137,754,546 - 137,857,340 on strand +	deoxyribose-phosphate aldolase (putative) [
	Strap (ENSMUSG00000030224)	6	137,735,078 - 137,751,932 on strand +	serine/threonine kinase receptor associated protein
	Eps8 (ENSMUSG00000015766)	6	137,477,245 - 137,654,876 on strand -	epidermal growth factor receptor pathway substrate 8
	Ptpro (ENSMUSG00000030223)	6	137,252,319 - 137,463,233 on strand +	protein tyrosine phosphatase, receptor type, O
	Rerg (ENSMUSG00000030222)	6	137,054,825 - 137,170,497 on strand -	RAS-like, estrogen-regulated, growth-inhibitor
	Pde6h (ENSMUSG00000064330)	6	136,923,832 - 136,968,865 on strand +	phosphodiesterase 6H, cGMP-specific, cone, gamma
	Arhgdib (ENSMUSG00000030220)	6	136,923,655 - 136,941,899 on strand -	Rho, GDP dissociation inhibitor (GDI) beta
	Erp27 (ENSMUSG00000030219)	6	136,907,311 - 136,922,180 on strand -	endoplasmic reticulum protein 27
	Mgp (ENSMUSG00000030218)	6	136,872,435 - 136,875,823 on strand -	matrix Gla protein
	Art4 (ENSMUSG00000030217)	6	136,848,451 - 136,857,733 on strand -	ADP-ribosyltransferase 4
	Smco3 (ENSMUSG00000043298)	6	136,829,927 - 136,835,452 on strand -	single-pass membrane protein with coiled-coil domains 3
	BC049715 (ENSMUSG00000047515)	6	136,827,626 - 136,840,662 on strand +	cDNA sequence BC049715
	Wbp11 (ENSMUSG00000030216)	6	136,813,654 - 136,828,233 on strand -	WW domain binding protein 11
	H2afj (ENSMUSG00000060032)	6	136,808,244 - 136,810,074 on strand +	H2A histone family, member J
	Hist4h4 (ENSMUSG00000096010)	6	136,801,553 - 136,804,415 on strand -	histone cluster 4, H4
	Gucy2c (ENSMUSG00000042638)	6	136,697,284 - 136,781,765 on strand -	guanylate cyclase 2c
	Plbd1 (ENSMUSG00000030214)	6	136,612,070 - 136,661,928 on strand -	phospholipase B domain containing 1
	Atf7ip (ENSMUSG00000030213)	6	136,506,167 - 136,610,862 on strand +	activating transcription factor 7 interacting protein
	E330021D16Rik (ENSMUSG00000045291)	6	136,400,317 - 136,415,569 on strand -	RIKEN cDNA E330021D16 gene
	Gm8994 (ENSMUSG00000094973)	6	136,327,539 - 136,329,983 on strand +	predicted gene 8994
	Grin2b (ENSMUSG00000030209)	6	135,713,233 - 136,173,511 on strand -	glutamate receptor, ionotropic, NMDA2B (epsilon 2)
	Emp1 (ENSMUSG00000030208)	6	135,362,545 - 135,383,173 on strand +	epithelial membrane protein 1
	Guinea Pig
	Nome do gene	Cromossomo Distancia	Nome da proteina
	CAPZA3 (ENSCPOG00000020891)	scaffold_28 : 12,165,525 - 12,166,564 on strand +	capping actin protein of muscle Z-line alpha subunit 3
	PLCZ1 (ENSCPOG00000006656)	scaffold_28 : 12,120,960 - 12,163,409 on strand -	phospholipase C zeta 1
	PIK3C2G (ENSCPOG00000007924)	scaffold_28 11,804,371 - 12,093,521 on strand +	phosphatidylinositol-4-phosphate 3-kinase catalytic subunit type 2 gamma
	RERGL (ENSCPOG00000019470)	scaffold_28 11,650,255 - 11,658,965 on strand -	RERG like
	LMO3 (ENSCPOG00000000364)	scaffold_28 10,483,755 - 10,531,904 on strand -	LIM domain only 3
	MGST1 (ENSCPOG00000011714)	scaffold_28 : 10,302,945 - 10,312,021 on strand +	microsomal glutathione S-transferase 1 [
	SLC15A5 (ENSCPOG00000021614)	scaffold_28 : 10,133,253 - 10,215,353 on strand -	solute carrier family 15 member 5
	DERA (ENSCPOG00000001177)	scaffold_28 : 9,897,206 - 9,973,751 on strand +	deoxyribose-phosphate aldolase
	STRAP (ENSCPOG00000001176)	scaffold_28 : 9,836,020 - 9,857,248 on strand +	serine/threonine kinase receptor associated protein
	ENSCPOG00000019388	scaffold_28 : 9,751,122 - 9,751,313 on strand -
	EPS8 (ENSCPOG00000012163)	scaffold_28 : 9,580,474 - 9,625,778 on strand -	epidermal growth factor receptor pathway substrate 8
	PTPRO (ENSCPOG00000014389)	scaffold_28 : 9,348,486 - 9,558,016 on strand +	protein tyrosine phosphatase, receptor type O
	ENSCPOG00000023174	scaffold_28 : 9,323,814 - 9,324,134 on strand +
	RERG (ENSCPOG00000000528)	scaffold_28 : 9,147,912 - 9,159,798 on strand -	RAS like estrogen regulated growth inhibitor
	PDE6H (ENSCPOG00000025430)	scaffold_28 : 9,040,834 - 9,044,218 on strand +	phosphodiesterase 6H
	ARHGDIB (ENSCPOG00000000298)	scaffold_28 : 8,998,349 - 9,006,132 on strand -	Rho GDP dissociation inhibitor beta [
	MGP (ENSCPOG00000005250)	scaffold_28 : 8,941,903 - 8,944,822 on strand -	matrix Gla protein
	ART4 (ENSCPOG00000005245)	scaffold_28 : 8,904,262 - 8,913,809 on strand -	ADP-ribosyltransferase 4 (Dombrock blood group)
	C12orf60 (ENSCPOG00000027242)	scaffold_28 : 8,898,367 - 8,899,098 on strand +	chromosome 12 open reading frame 60
	ENSCPOG00000005237	scaffold_28 : 8,867,340 - 8,879,910 on strand -
	H2AFJ (ENSCPOG00000021529)	scaffold_28 : 8,855,670 - 8,856,059 on strand +	H2A histone family member J
	ENSCPOG00000024453	scaffold_28 : 8,852,527 - 8,852,838 on strand -
	Gucy2c (ENSCPOG00000008513)	scaffold_28 : 8,747,349 - 8,824,942 on strand -	Cavia porcellus guanylate cyclase 2c (Gucy2c), mRNA.
	PLBD1 (ENSCPOG00000014977)	scaffold_28 : 8,637,072 - 8,683,271 on strand -	phospholipase B domain containing 1
	ATF7IP (ENSCPOG00000014973)	8,550,835 - 8,632,219 on strand +	activating transcription factor 7 interacting protein
	GRIN2B (ENSCPOG00000006083)	scaffold_28 : 7,623,441 - 7,902,020 on strand -	glutamate ionotropic receptor NMDA type subunit 2B
	EMP1 (ENSCPOG00000012346)	scaffold_28 : 7,307,621 - 7,310,656 on strand +	epithelial membrane protein 1
	GSG1 (ENSCPOG00000001265)	scaffold_28 : 7,161,616 - 7,176,291 on strand -	germ cell associated 1
	FAM234B (ENSCPOG00000001262)	scaffold_28 : 7,130,265 - 7,157,932 on strand +	family with sequence similarity 234 member B
	HEBP1 (ENSCPOG00000013516)	scaffold_28 : 7,064,154 - 7,087,187 on strand -	heme binding protein 1
	Dog
	Nome do gene	Cromossomo Distancia	Nome do gene2
	PLEKHA5 (ENSCAFG00000012478)	27 : 27,776,987 - 28,023,983 on strand -	pleckstrin homology domain containing A5
	CAPZA3 (ENSCAFG00000012506)	27 : 28,362,120 - 28,363,019 on strand -	capping actin protein of muscle Z-line alpha subunit 3
	PLCZ1 (ENSCAFG00000012538)	27 : 28,363,792 - 28,419,255 on strand +	phospholipase C zeta 1
	PIK3C2G (ENSCAFG00000012564)	27 : 28,446,967 - 28,818,658 on strand -	phosphatidylinositol-4-phosphate 3-kinase catalytic subunit type 2 gamma
	RERGL (ENSCAFG00000012586)	27 : 28,943,929 - 28,953,337 on strand +	RERG like
	ENSCAFG00000012592	27 : 29,088,679 - 29,090,265 on strand +
	LMO3 (ENSCAFG00000012610)	27 : 30,153,135 - 30,208,572 on strand +	LIM domain only 3
	MGST1 (ENSCAFG00000012619)	27 : 30,369,668 - 30,392,054 on strand -	microsomal glutathione S-transferase 1
	SLC15A5 (ENSCAFG00000012622)	27 : 30,452,346 - 30,533,873 on strand +	solute carrier family 15 member 5
	DERA (ENSCAFG00000012635)	27 : 30,675,334 - 30,740,097 on strand -	deoxyribose-phosphate aldolase
	STRAP (ENSCAFG00000012679)	27 : 30,798,838 - 30,817,271 on strand -	serine/threonine kinase receptor associated protein
	EPS8 (ENSCAFG00000012724)	27 : 30,951,397 - 31,072,844 on strand +	epidermal growth factor receptor pathway substrate 8
	PTPRO (ENSCAFG00000012789)	27 : 31,082,289 - 31,321,894 on strand -	protein tyrosine phosphatase, receptor type O
	RERG (ENSCAFG00000012854)	27 : 31,413,308 - 31,528,921 on strand +	RAS like estrogen regulated growth inhibitor
	PDE6H (ENSCAFG00000012874)	27 : 31,640,667 - 31,664,764 on strand -	phosphodiesterase 6H
	ARHGDIB (ENSCAFG00000012883)	27 : 31,662,896 - 31,683,590 on strand +	Rho GDP dissociation inhibitor beta
	ERP27 (ENSCAFG00000012892)	27 : 31,682,927 - 31,703,937 on strand +	endoplasmic reticulum protein 27
	ENSCAFG00000012963	27 : 31,735,326 - 31,738,744 on strand +
	ART4 (ENSCAFG00000012972)	27 : 31,775,789 - 31,785,945 on strand +	ADP-ribosyltransferase 4
	C12orf60 (ENSCAFG00000012974)	27 : 31,792,144 - 31,792,875 on strand -	chromosome 12 open reading frame 60
	SMCO3 (ENSCAFG00000012980)	27 : 31,802,393 - 31,803,070 on strand +	single-pass membrane protein with coiled-coil domains 3
	WBP11 (ENSCAFG00000012926)	27 : 31,807,750 - 31,821,147 on strand +	WW domain binding protein 11
	H2AFJ (ENSCAFG00000012984)	27 : 31,835,623 - 31,836,012 on strand -	H2A histone family member J
	ENSCAFG00000012989	27 : 31,840,011 - 31,840,319 on strand +
	GUCY2C (ENSCAFG00000013037)	27 : 31,917,604 - 31,990,025 on strand +	guanylate cyclase 2C [
	PLBD1 (ENSCAFG00000013089)	32,031,303 - 32,081,805 on strand +	phospholipase B domain containing 1
	ATF7IP (ENSCAFG00000013106)	27 : 32,086,802 - 32,195,498 on strand -	activating transcription factor 7 interacting protein
	GRIN2B (ENSCAFG00000013148)	27 : 32,471,153 - 32,877,656 on strand +	Glutamate receptor ionotropic, NMDA 2B
	EMP1 (ENSCAFG00000031033)	27 : 33,177,639 - 33,184,332 on strand -	epithelial membrane protein 1
	GSG1 (ENSCAFG00000013186)	27 : 33,286,552 - 33,302,370 on strand +	germ cell associated 1
	FAM234B (ENSCAFG00000013198)	27 : 33,302,713 - 33,338,139 on strand -	family with sequence similarity 234 member B
	Megabat
	Nome do gene	Cromossomo Distancia	Nome da proteina
	EPS8 (ENSPVAG00000013327)	GeneScaffold_303 : 649,498 - 708,352 on strand -	epidermal growth factor receptor pathway substrate 8
	PTPRO (ENSPVAG00000013322)	GeneScaffold_303 : 455,363 - 632,505 on strand +	protein tyrosine phosphatase, receptor type O
	RERG (ENSPVAG00000013319)	GeneScaffold_303 : 331,105 - 390,762 on strand -	RAS like estrogen regulated growth inhibitor
	PDE6H (ENSPVAG00000013318)	GeneScaffold_303 : 258,937 - 262,504 on strand +	phosphodiesterase 6H
	ARHGDIB (ENSPVAG00000013316)	GeneScaffold_303 : 231,119 - 238,877 on strand -	Rho GDP dissociation inhibitor beta
	ERP27 (ENSPVAG00000013314)	GeneScaffold_303 : 212,585 - 229,595 on strand -	endoplasmic reticulum protein 27
	MGP (ENSPVAG00000013312)	GeneScaffold_303 : 180,265 - 183,469 on strand -	matrix Gla protein
	ART4 (ENSPVAG00000013309)	GeneScaffold_303 : 142,818 - 153,702 on strand -	ADP-ribosyltransferase 4
	SMCO3 (ENSPVAG00000013307)	GeneScaffold_303 : 128,333 - 129,010 on strand -	single-pass membrane protein with coiled-coil domains 3
	WBP11 (ENSPVAG00000013305)	GeneScaffold_303 : 112,834 - 124,590 on strand -	WW domain binding protein 11
	H2AFJ (ENSPVAG00000013303)	GeneScaffold_303 : 99,501 - 99,854 on strand +	H2A histone family member J
	GUCY2C (ENSPVAG00000013293)	GeneScaffold_303 : 17,840 - 76,063 on strand -	guanylate cyclase 2C
	Microbat
	Nome do gene	Cromossomo Distancia	Nome da proteina
	CAPZA3 (ENSMLUG00000009150)	GL429777 : 16,054,318 - 16,055,400 on strand +	capping actin protein of muscle Z-line alpha subunit 3
	PLCZ1 (ENSMLUG00000017203)	GL429777 : 16,010,528 - 16,052,588 on strand -	phospholipase C zeta 1
	PIK3C2G (ENSMLUG00000017194)	GL429777 : 15,749,099 - 15,996,771 on strand +	phosphatidylinositol-4-phosphate 3-kinase catalytic subunit type 2 gamma
	ENSMLUG00000022198	GL429777 : 15,709,346 - 15,709,717 on strand -	Uncharacterized protein
	RERGL (ENSMLUG00000013060)	GL429777 : 15,623,517 - 15,633,140 on strand -	RERG like
	LMO3 (ENSMLUG00000029362)	GL429777 : 14,817,282 - 14,873,349 on strand -	LIM domain only 3
	MGST1 (ENSMLUG00000002358)	GL429777 : 14,669,723 - 14,676,194 on strand +	microsomal glutathione S-transferase 1
	SLC15A5 (ENSMLUG00000014780)	GL429777 : 14,537,175 - 14,613,242 on strand -	solute carrier family 15 member 5
	DERA (ENSMLUG00000002790)	GL429777 : 14,345,337 - 14,409,159 on strand +	deoxyribose-phosphate aldolase
	STRAP (ENSMLUG00000002797)	GL429777 : 14,287,573 - 14,304,578 on strand +	serine/threonine kinase receptor associated protein
	EPS8 (ENSMLUG00000015815)	GL429777 : 14,043,176 - 14,111,163 on strand -	epidermal growth factor receptor pathway substrate 8
	ENSMLUG00000015781	GL429777 : 13,934,069 - 14,027,457 on strand +	Uncharacterized protein
	RERG (ENSMLUG00000015778)	GL429777 : 13,665,111 - 13,676,041 on strand -	RAS like estrogen regulated growth inhibitor
	PDE6H (ENSMLUG00000025996)	GL429777 : 13,592,478 - 13,597,329 on strand +	phosphodiesterase 6H
	ARHGDIB (ENSMLUG00000006248)	GL429777 : 13,559,412 - 13,569,113 on strand -	Rho GDP dissociation inhibitor beta
	ERP27 (ENSMLUG00000006242)	GL429777 : 13,538,216 - 13,557,923 on strand -	endoplasmic reticulum protein 27
	MGP (ENSMLUG00000006238)	GL429777 : 13,496,369 - 13,499,662 on strand -	matrix Gla protein
	ART4 (ENSMLUG00000006235)	GL429777 : 13,459,573 - 13,468,582 on strand -	ADP-ribosyltransferase 4 (Dombrock blood group)
	C12orf60 (ENSMLUG00000015212)	GL429777 : 13,456,304 - 13,457,035 on strand +	chromosome 12 open reading frame 60
	SMCO3 (ENSMLUG00000025842)	GL429777 : 13,446,625 - 13,447,302 on strand -	single-pass membrane protein with coiled-coil domains 3
	ENSMLUG00000015216	GL429777 : 13,429,256 - 13,442,516 on strand -	Uncharacterized protein
	GUCY2C (ENSMLUG00000003624)	GL429777 : 13,338,470 - 13,406,758 on strand -	guanylate cyclase 2C
	PLBD1 (ENSMLUG00000003621)	GL429777 : 13,260,375 - 13,312,198 on strand -	phospholipase B domain containing 1
	ATF7IP (ENSMLUG00000003611)	GL429777 : 13,205,868 - 13,255,300 on strand +	activating transcription factor 7 interacting protein
	GRIN2B (ENSMLUG00000009625)	GL429777 : 12,459,414 - 12,638,766 on strand -	glutamate ionotropic receptor NMDA type subunit 2B
	EMP1 (ENSMLUG00000012047)	GL429777 : 12,190,627 - 12,193,754 on strand +	epithelial membrane protein 1
	GSG1 (ENSMLUG00000012032)	GL429777 : 12,072,170 - 12,078,915 on strand -	germ cell associated 1
	FAM234B (ENSMLUG00000012022)	GL429777 : 12,045,927 - 12,068,313 on strand +	family with sequence similarity 234 member B
	HEBP1 (ENSMLUG00000003179)	GL429777 : 12,005,249 - 12,025,939 on strand -	heme binding protein 1
	GPRC5D (ENSMLUG00000003175)	GL429777 : 11,980,922 - 11,986,888 on strand -	G protein-coupled receptor class C group 5 member D
	Opossum
	Nome do gene	Cromossomo Distancia	Nome da proteina
	PLEKHA5 (ENSMODG00000017872)	8 : 99,255,795 - 99,435,552 on strand -	pleckstrin homology domain containing A5
	CAPZA3 (ENSMODG00000017885)	8 : 99,825,224 - 99,826,123 on strand -	capping actin protein of muscle Z-line alpha subunit 3
	PLCZ1 (ENSMODG00000017890)	8 : 99,826,858 - 99,912,414 on strand +	phospholipase C zeta 1
	ENSMODG00000028293	8 : 101,006,235 - 101,007,515 on strand +	Uncharacterized protein
	ENSMODG00000027906	8 : 101,952,146 - 101,978,999 on strand -	Uncharacterized protein
	LMO3 (ENSMODG00000017897)	8 : 102,027,632 - 102,096,287 on strand +	LIM domain only 3
	MGST1 (ENSMODG00000017898)	8 : 102,404,368 - 102,432,585 on strand -	microsomal glutathione S-transferase 1
	SLC15A5 (ENSMODG00000017901)	8 : 102,564,544 - 102,701,455 on strand +	solute carrier family 15 member 5
	DERA (ENSMODG00000017903)	8 : 102,841,300 - 102,982,208 on strand -	deoxyribose-phosphate aldolase
	ENSMODG00000025454	8 : 102,859,195 - 102,941,252 on strand +	Uncharacterized protein
	STRAP (ENSMODG00000017913)	102,989,999 - 103,010,691 on strand -	serine/threonine kinase receptor associated protein [
	EPS8 (ENSMODG00000017925)	8 : 103,257,030 - 103,366,668 on strand +	epidermal growth factor receptor pathway substrate 8
	PTPRO (ENSMODG00000017933)	8 : 103,397,714 - 103,532,784 on strand -	protein tyrosine phosphatase, receptor type O
	RERG (ENSMODG00000017938)	8 : 103,717,749 - 103,841,901 on strand +	RAS like estrogen regulated growth inhibitor
	PDE6H (ENSMODG00000017940)	8 : 103,952,788 - 103,962,244 on strand -	phosphodiesterase 6H
	ARHGDIB (ENSMODG00000017941)	8 : 104,011,068 - 104,031,704 on strand +	Rho GDP dissociation inhibitor beta
	MGP (ENSMODG00000017944)	: 8 : 104,108,347 - 104,114,127 on strand +	matrix Gla protein
	SMCO3 (ENSMODG00000024869)	8 : 104,195,411 - 104,196,088 on strand +	single-pass membrane protein with coiled-coil domains 3
	ENSMODG00000017949	8 : 104,207,224 - 104,223,756 on strand +	Uncharacterized protein
	ENSMODG00000024867	8 : 104,271,845 - 104,359,691 on strand +	Uncharacterized protein
	NECAP1 (ENSMODG00000017970)	8 : 104,396,902 - 104,408,000 on strand -	NECAP endocytosis associated 1
	FOXJ2 (ENSMODG00000017974)	8 : 104,446,786 - 104,483,051 on strand -	forkhead box J2
	ENSMODG00000017976	8 : 104,571,681 - 104,583,767 on strand +	Uncharacterized protein
	ENSMODG00000017979	8 : 104,628,273 - 104,648,421 on strand -	Uncharacterized protein
	ENSMODG00000017988	8 : 104,682,602 - 104,771,610 on strand +	Uncharacterized protein
	ENSMODG00000017991	8 : 104,814,941 - 104,821,045 on strand +
	PHC1 (ENSMODG00000017995)	8 : 104,819,445 - 104,838,359 on strand -	polyhomeotic homolog 1
	RIMKLB (ENSMODG00000017997)	8 : 104,932,756 - 105,011,275 on strand -	ribosomal modification protein rimK like family member B
	MFAP5 (ENSMODG00000018000)	8 : 105,106,376 - 105,130,618 on strand +	microfibrillar associated protein 5
	AICDA (ENSMODG00000018002)	8 : 105,169,817 - 105,176,826 on strand +	activation induced cytidine deaminase
	APOBEC1 (ENSMODG00000018004)	8 : 105,213,203 - 105,222,916 on strand -	apolipoprotein B mRNA editing enzyme catalytic subunit 1
	Chicken
	Nome do gene	Cromossomo Distancia	Nome da proteina
	SCYL2 (ENSGALG00000011569)	1 : 47,268,108 - 47,299,064 on strand +	Gallus gallus SCY1-like, kinase-like 2 (SCYL2), mRNA.
	SLC17A8 (ENSGALG00000041122)	1 : 47,308,619 - 47,334,316 on strand +	solute carrier family 17 member 8
	NR1H4 (ENSGALG00000011594)	1 : 47,358,279 - 47,391,411 on strand +	bile acid receptor
	GAS2L3 (ENSGALG00000028373)	1 : 47,393,195 - 47,407,557 on strand +	Gallus gallus growth arrest-specific 2 like 3
	ANO4 (ENSGALG00000011614)	1 : 47,513,533 - 47,631,233 on strand +	anoctamin 4
	SLC5A8 (ENSGALG00000011633)	1 : 47,637,919 - 47,660,352 on strand -	solute carrier family 5 member 8
	ARL1 (ENSGALG00000011651)	1 : 47,732,183 - 47,737,782 on strand -	ADP-ribosylation factor-like protein 1
	ENSGALG00000011662	1 : 47,737,682 - 47,784,522 on strand -
	CNOT4 (ENSGALG00000011682)	1 : 47,800,013 - 47,869,940 on strand +	Gallus gallus CCR4-NOT transcription complex, subunit 4 (CNOT4), mRNA.
	ENSGALG00000011717	1 : 47,884,753 - 47,909,098 on strand +
	STRA8 (ENSGALG00000011722)	1 : 47,914,186 - 47,928,240 on strand -	stimulated by retinoic acid 8
	WDR91 (ENSGALG00000011724)	1 : 47,929,076 - 47,944,077 on strand +	Gallus gallus WD repeat domain 91 (WDR91), mRNA
	AGBL3 (ENSGALG00000011727)	1 : 47,963,625 - 47,974,613 on strand -	ATP/GTP binding protein like 3
	PDE6H (ENSGALG00000025735)	1 : 47,994,367 - 48,000,190 on strand -	Gallus gallus phosphodiesterase 6H, cGMP-specific, cone, gamma (PDE6H), mRNA.
	ARHGDIB (ENSGALG00000011738)	1 : 48,011,198 - 48,019,508 on strand +	Gallus gallus Rho GDP dissociation inhibitor (GDI) beta (ARHGDIB), mRNA.
	ERP27 (ENSGALG00000011739)	1 : 48,026,693 - 48,037,932 on strand +	endoplasmic reticulum protein 27
	MGP (ENSGALG00000011740)	1 : 48,052,894 - 48,058,138 on strand +	Gallus gallus matrix Gla protein (MGP), mRNA
	OC3 (ENSGALG00000028560)	1 : 48,061,738 - 48,067,659 on strand +	Gallus gallus osteocalcin-like protein OC3 (OC3), mRNA.
	ART4 (ENSGALG00000011742)	1 : 48,069,970 - 48,074,563 on strand +	Gallus gallus ADP-ribosyltransferase 4 (Dombrock blood group) (ART4), mRNA.
	SMCO3 (ENSGALG00000011743)	1 : 48,076,790 - 48,077,467 on strand +	single-pass membrane protein with coiled-coil domains 3
	WBP11 (ENSGALG00000011745)	1 : 48,081,434 - 48,091,448 on strand +	WW domain binding protein 11
	ENSGALG00000039794	1 : 48,091,388 - 48,092,200 on strand -
	ENSGALG00000011747	1 : 48,093,690 - 48,094,445 on strand +
	HIST1H2B7 (ENSGALG00000039722)	1 : 48,095,494 - 48,095,874 on strand -	Gallus gallus histone cluster 1, H2B-VII (similar to human histone cluster 1, class H2B, member N) (HIST1H2B7), mRNA.
	ENSGALG00000033191	1 : 48,099,109 - 48,099,504 on strand -
	HIST1H46L2 (ENSGALG00000032272)	1 : 48,099,163 - 48,099,621 on strand +	Gallus gallus histone cluster 1, H4-IV, germinal H4-like 2 (similar to human histone cluster 1, class H4 genes) (HIST1H46L2), mRNA.
	HIST1H3H (ENSGALG00000043062)	1 : 48,100,497 - 48,100,907 on strand -	histone cluster 1, H3h
	HIST1H46L2 (ENSGALG00000035445)	1 : 48,102,824 - 48,103,259 on strand -	Gallus gallus histone cluster 1, H4-IV, germinal H4-like 2 (similar to human histone cluster 1, class H4 genes) (HIST1H46L2), mRNA
	ENSGALG00000036483	1 : 48,102,939 - 48,103,334 on strand +
	Turkey
	Nome do gene	Cromossomo Distancia	Nome da proteina
	SLC17A8 (ENSMGAG00000011674)	1 : 48,075,961 - 48,102,232 on strand +	solute carrier family 17 member 8
	NR1H4 (ENSMGAG00000011690)	1 : 48,126,689 - 48,157,796 on strand +	nuclear receptor subfamily 1 group H member 4
	GAS2L3 (ENSMGAG00000011632)	1 : 48,162,496 - 48,175,518 on strand +	growth arrest specific 2 like 3
	ANO4 (ENSMGAG00000011699)	1 : 48,287,574 - 48,392,491 on strand +	anoctamin 4
	SLC5A8 (ENSMGAG00000011713)	1 : 48,398,565 - 48,420,840 on strand -	solute carrier family 5 member 8
	UTP20 (ENSMGAG00000011726)	1 : 48,433,614 - 48,494,150 on strand +	UTP20, small subunit processome component
	ARL1 (ENSMGAG00000011748)	1 : 48,494,360 - 48,498,998 on strand -	ADP ribosylation factor like GTPase 1
	NUP205 (ENSMGAG00000011752)	1 : 48,501,444 - 48,545,743 on strand -	nucleoporin 205
	CNOT4 (ENSMGAG00000011788)	1 : 48,591,669 - 48,630,402 on strand +	CCR4-NOT transcription complex subunit 4
	ENSMGAG00000011766	1 : 48,653,390 - 48,669,488 on strand +	Uncharacterized protein
	STRA8 (ENSMGAG00000011772)	1 : 48,674,514 - 48,688,285 on strand -	stimulated by retinoic acid 8
	WDR91 (ENSMGAG00000011777)	1 : 48,689,606 - 48,703,961 on strand +	WD repeat domain 91
	ENSMGAG00000017358	1 : 48,707,997 - 48,708,281 on strand -
	AGBL3 (ENSMGAG00000011798)	1 : 48,725,384 - 48,735,293 on strand -	ATP/GTP binding protein like 3
	PDE6H (ENSMGAG00000011801)	1 : 48,758,334 - 48,764,158 on strand -	phosphodiesterase 6H
	ARHGDIB (ENSMGAG00000011805)	1 : 48,775,111 - 48,783,322 on strand +	Rho GDP dissociation inhibitor beta
	ENSMGAG00000011811	1 : 48,791,996 - 48,803,368 on strand +
	MGP (ENSMGAG00000011815)	1 : 48,818,495 - 48,823,844 on strand +	matrix Gla protein
	ART4 (ENSMGAG00000011827)	1 : 48,836,019 - 48,840,594 on strand +	ADP-ribosyltransferase 4
	ENSMGAG00000015702	1 : 48,839,719 - 48,839,988 on strand -	Uncharacterized protein
	SMCO3 (ENSMGAG00000011828)	1 : 48,842,844 - 48,843,521 on strand +	single-pass membrane protein with coiled-coil domains 3
	WBP11 (ENSMGAG00000011831)	1 : 48,845,871 - 48,855,339 on strand +	WW domain binding protein 11
	ENSMGAG00000011849	1 : 48,879,658 - 48,880,601 on strand +	Uncharacterized protein
	ENSMGAG00000011849	1 : 48,879,658 - 48,880,601 on strand +	Uncharacterized protein
	ENSMGAG00000007950	1 : 48,883,957 - 48,884,425 on strand +
	ENSMGAG00000015705	1 : 48,885,188 - 48,885,499 on strand -
	ENSMGAG00000015706	1 : 48,898,157 - 48,898,537 on strand +	Histone H2B
	HIST1H4H (ENSMGAG00000015703)	1 : 48,904,847 - 48,905,158 on strand +	histone cluster 1, H4h
	ENSMGAG00000015708	1 : 48,905,395 - 48,905,775 on strand -	Histone H2B
	ENSMGAG00000017290	1 : 48,906,321 - 48,906,524 on strand -	Histone H4
	ENSMGAG00000011852	1 : 48,908,598 - 49,001,123 on strand -	Uncharacterized protein
	ENSMGAG00000015710	1 : 48,925,759 - 48,926,070 on strand +
	Chinese Turtle
	Nome do gene	Cromossomo Distancia	Nome da proteina
	SLC17A8 (ENSPSIG00000005348)	JH209446.1 : 153,469 - 200,441 on strand +	solute carrier family 17 member 8
	NR1H4 (ENSPSIG00000005774)	JH209446.1 : 251,336 - 304,429 on strand +	nuclear receptor subfamily 1 group H member 4
	GAS2L3 (ENSPSIG00000007108)	JH209446.1 : 310,024 - 348,425 on strand +	growth arrest specific 2 like 3
	ANO4 (ENSPSIG00000007612)	JH209446.1 : 427,557 - 685,074 on strand +	anoctamin 4
	SLC5A8 (ENSPSIG00000013997)	JH209446.1 : 695,107 - 736,317 on strand -	solute carrier family 5 member 8
	UTP20 (ENSPSIG00000016689)	JH209446.1 : 781,171 - 858,937 on strand +	UTP20, small subunit processome component
	ARL1 (ENSPSIG00000006539)	JH209446.1 : 860,096 - 862,688 on strand -	ADP ribosylation factor like GTPase 1
	NUP205 (ENSPSIG00000006899)	JH209446.1 : 878,325 - 967,528 on strand -	nucleoporin 205
	CNOT4 (ENSPSIG00000011256)	JH209446.1 : 1,012,182 - 1,103,828 on strand +	CCR4-NOT transcription complex subunit 4
	ENSPSIG00000012985	JH209446.1 : 1,176,969 - 1,204,137 on strand +
	STRA8 (ENSPSIG00000013824)	JH209446.1 : 1,221,745 - 1,247,268 on strand -	stimulated by retinoic acid 8
	WDR91 (ENSPSIG00000014113)	JH209446.1 : 1,255,162 - 1,277,695 on strand +	WD repeat domain 91
	TMEM140 (ENSPSIG00000015467)	JH209446.1 : 1,259,817 - 1,287,021 on strand -	transmembrane protein 140
	AGBL3 (ENSPSIG00000015627)	JH209446.1 : 1,325,810 - 1,361,392 on strand -	ATP/GTP binding protein like 3
	PDE6H (ENSPSIG00000016325)	JH209446.1 : 1,404,697 - 1,407,854 on strand -	phosphodiesterase 6H
	ARHGDIB (ENSPSIG00000016539)	JH209446.1 : 1,423,919 - 1,435,249 on strand +	Rho GDP dissociation inhibitor beta
	ENSPSIG00000003609	JH209446.1 : 1,439,318 - 1,455,831 on strand +
	MGP (ENSPSIG00000003615)	JH209446.1 : 1,490,030 - 1,497,527 on strand +	matrix Gla protein
	ART4 (ENSPSIG00000003662)	JH209446.1 : 1,527,077 - 1,530,562 on strand +	ADP-ribosyltransferase 4 (Dombrock blood group)
	ENSPSIG00000001381	JH209446.1 : 1,532,315 - 1,533,085 on strand -
	SMCO3 (ENSPSIG00000001390)	JH209446.1 : 1,540,162 - 1,540,833 on strand +	single-pass membrane protein with coiled-coil domains 3
	WBP11 (ENSPSIG00000003674)	JH209446.1 : 1,546,896 - 1,566,168 on strand +	WW domain binding protein 11
	ENSPSIG00000003689	JH209446.1 : 1,567,784 - 1,584,071 on strand +
	ENSPSIG00000001405	JH209446.1 : 1,589,961 - 1,590,416 on strand +
	ENSPSIG00000001368	JH209446.1 : 1,593,042 - 1,593,755 on strand +
	ENSPSIG00000003742	JH209446.1 : 1,594,638 - 1,596,394 on strand -
	ENSPSIG00000001382	JH209446.1 : 1,606,578 - 1,606,985 on strand -
	ENSPSIG00000003754	JH209446.1 : 1,613,090 - 1,613,704 on strand +
	ENSPSIG00000001422	JH209446.1 : 1,614,382 - 1,614,693 on strand -
	ENSPSIG00000001455	JH209446.1 : 1,621,469 - 1,621,858 on strand -
	ENSPSIG00000001472	JH209446.1 : 1,622,168 - 1,622,595 on strand +
	Lizard
	Nome do gene	Cromossomo Distancia	Nome da proteina
	ENSACAG00000025634	5 : 28,470,946 - 28,486,533 on strand -
	ANO4 (ENSACAG00000012017)	5 : 28,385,435 - 28,443,669 on strand -	anoctamin 4
	ENSACAG00000012014	5 : 28,343,214 - 28,379,937 on strand +
	SLC5A8 (ENSACAG00000011810)	5 : 28,318,783 - 28,340,168 on strand +	solute carrier family 5 member 8
	UTP20 (ENSACAG00000011671)	5 : 28,223,299 - 28,302,376 on strand -	UTP20, small subunit processome component
	ARL1 (ENSACAG00000011602)	5 : 28,216,468 - 28,222,060 on strand +	ADP ribosylation factor like GTPase 1
	NUP205 (ENSACAG00000011264)	5 : 28,171,642 - 28,215,749 on strand +	nucleoporin 205
	POLR3H (ENSACAG00000011213)	5 : 28,163,022 - 28,169,024 on strand -	RNA polymerase III subunit H
	CNOT4 (ENSACAG00000011154)	5 : 28,085,500 - 28,160,480 on strand -	CCR4-NOT transcription complex subunit 4
	ENSACAG00000011027	5 : 28,006,124 - 28,044,724 on strand -
	STRA8 (ENSACAG00000011014)	5 : 27,969,423 - 27,998,089 on strand +	stimulated by retinoic acid 8
	WDR91 (ENSACAG00000010904)	5 : 27,941,160 - 27,964,468 on strand -	WD repeat domain 91
	TMEM140 (ENSACAG00000010897)	5 : 27,929,166 - 27,929,714 on strand +	transmembrane protein 140
	AGBL3 (ENSACAG00000010849)	5 : 27,857,234 - 27,915,974 on strand +	ATP/GTP binding protein like 3
	PDE6H (ENSACAG00000020931)	5 : 27,845,002 - 27,848,269 on strand +	phosphodiesterase 6H
	ARHGDIB (ENSACAG00000010811)	5 : 27,794,455 - 27,803,171 on strand -	Rho GDP dissociation inhibitor beta
	ERP27 (ENSACAG00000010795)	5 : 27,756,556 - 27,790,802 on strand -	endoplasmic reticulum protein 27
	MGP (ENSACAG00000010792)	5 : 27,709,526 - 27,723,015 on strand -	matrix Gla protein
	ENSACAG00000010784	5 : 27,684,518 - 27,685,294 on strand +
	SMCO3 (ENSACAG00000010786)	5 : 27,679,164 - 27,680,661 on strand -	single-pass membrane protein with coiled-coil domains 3
	WBP11 (ENSACAG00000010717)	5 : 27,656,127 - 27,673,259 on strand -	WW domain binding protein 11
	ENSACAG00000010716	5 : 27,642,827 - 27,643,234 on strand -
	ENSACAG00000028268	5 : 27,627,322 - 27,634,188 on strand -
	ENSACAG00000029320	5 : 27,600,388 - 27,623,484 on strand -
	APOLD1 (ENSACAG00000010710)	5 : 27,598,925 - 27,599,569 on strand -	apolipoprotein L domain containing 1
	DDX47 (ENSACAG00000010648)	5 : 27,571,877 - 27,589,379 on strand -	DEAD-box helicase 47
	ENSACAG00000010644	5 : 27,524,193 - 27,540,301 on strand -
	ENSACAG00000022275	5 : 27,489,654 - 27,503,740 on strand +
	HEBP1 (ENSACAG00000010626)	5 : 27,471,543 - 27,484,767 on strand +	heme binding protein 1
	TCF20 (ENSACAG00000003634)	5 : 27,270,816 - 27,325,510 on strand -	transcription factor 20
	ENSACAG00000003662	5 : 27,251,473 - 27,253,490 on strand -
	Frog
	Nome do gene	Cromossomo Distancia	Nome da proteina
	ENSXETG00000032675	GL172795.1 : 30,616 - 60,227 on strand +
	ENSXETG00000025215	GL172795.1 : 80,528 - 82,442 on strand -
	arhgdib (ENSXETG00000002772)	GL172795.1 : 93,550 - 104,246 on strand +	Rho GDP dissociation inhibitor (GDI) beta
	ERP27 (ENSXETG00000032403)	GL172795.1 : 113,099 - 120,662 on strand +	endoplasmic reticulum protein 27
	mgp (ENSXETG00000025213)	GL172795.1 : 159,336 - 163,887 on strand +	matrix Gla protein
	wbp11 (ENSXETG00000002770)	GL172795.1 : 175,509 - 188,306 on strand +	WW domain binding protein 11
	ptx (ENSXETG00000002769)	GL172795.1 : 192,804 - 226,401 on strand +	pentraxin
	XB-GENE-5780408 (ENSXETG00000025212)	GL172795.1 : 230,113 - 232,181 on strand -	C-reactive protein, pentraxin-related
	ENSXETG00000002768	GL172795.1 : 239,287 - 240,312 on strand -
	crp.3 (ENSXETG00000025211)	GL172795.1 : 262,148 - 264,218 on strand +	C-reactive protein, pentraxin-related, gene 3
	josd2 (ENSXETG00000002767)	GL172795.1 : 272,859 - 279,727 on strand +	Josephin domain containing 2
	WFDC2 (ENSXETG00000033305)	GL172795.1 : 286,257 - 287,676 on strand -	WAP four-disulfide core domain 2
	twf2 (ENSXETG00000002765)	GL172795.1 : 296,387 - 332,438 on strand -	twinfilin actin binding protein 2
	GLYCTK (ENSXETG00000030358)	GL172795.1 : 332,628 - 340,933 on strand +	glycerate kinase
	ENSXETG00000030029	GL172795.1 : 350,312 - 397,717 on strand +
	bap1 (ENSXETG00000000091)	GL172795.1 : 398,710 - 410,678 on strand -	BRCA1 associated protein-1 (ubiquitin carboxy-terminal hydrolase)
	ENSXETG00000032120	GL172795.1 : 426,808 - 435,706 on strand +
	acy1.1 (ENSXETG00000000089)	GL172795.1 : 452,876 - 478,173 on strand -	aminoacylase 1, gene 1

## Sheet: ARHGDIG
	ARGHDIG
	Coelacanth
	Nome do gene	Cromossomo	Distancia	Nome da proteina
	dnase1 (ENSLACG00000014377)	JH127264.1	1,014,848 - 1,036,020 on strand -	deoxyribonuclease I
	ECI1 (ENSLACG00000014230)	JH127264.1	986,857 - 1,000,612 on strand +	enoyl-CoA delta isomerase 1
	PTX4 (ENSLACG00000014162)	JH127264.1	974,372 - 979,206 on strand -	pentraxin 4
	CLCN7 (ENSLACG00000013303)	JH127264.1	837,751 - 929,542 on strand -	chloride voltage-gated channel 7
	ENSLACG00000022418	JH127264.1	766,327 - 795,730 on strand -
	ENSLACG00000012692	JH127264.1	752,025 - 753,177 on strand +
	tmem8a (ENSLACG00000012144)	JH127264.1	681,785 - 731,702 on strand -	transmembrane protein 8A
	RGS11 (ENSLACG00000010264)	JH127264.1	487,135 - 594,985 on strand +	regulator of G-protein signaling 11
	ARHGDIG (ENSLACG00000007716)	JH127264.1	294,319 - 425,471 on strand -	Rho GDP dissociation inhibitor gamma
	PDIA2 (ENSLACG00000006605)	JH127264.1	226,688 - 283,726 on strand -	protein disulfide isomerase family A member 2
	HMOX2 (ENSLACG00000005680)	JH127264.1	179,427 - 211,535 on strand -	heme oxygenase 2
	DNAJA3 (ENSLACG00000004771)	JH127264.1	138,479 - 168,255 on strand +	DnaJ heat shock protein family (Hsp40) member A3
	ENSLACG00000003132	JH127264.1	71,922 - 98,478 on strand -
	Platyfish
	Nome do gene	Cromossomo	Distancia	Nome da proteina
	ENSXMAG00000001710	JH556814.1	1,226,145 - 1,244,521 on strand -
	tnrc6a (ENSXMAG00000001697)	JH556814.1	1,172,111 - 1,187,172 on strand -	trinucleotide repeat containing 6a
	ndufab1a (ENSXMAG00000001687)	JH556814.1	1,162,411 - 1,167,713 on strand +	NADH dehydrogenase (ubiquinone) 1, alpha/beta subcomplex, 1a
	dctn5 (ENSXMAG00000001678)	JH556814.1	1,160,240 - 1,162,379 on strand -	dynactin 5
	C16orf72 (1 of many) (ENSXMAG00000001670)	JH556814.1	1,151,036 - 1,156,873 on strand +	chromosome 16 open reading frame 72
	usp7 (ENSXMAG00000001612)	JH556814.1	1,118,450 - 1,147,285 on strand -	ubiquitin specific peptidase 7 (herpes virus-associated)
	slc2a6 (ENSXMAG00000001591)	JH556814.1	1,095,657 - 1,103,929 on strand +	solute carrier family 2 (facilitated glucose transporter), member 6
	clcn7 (ENSXMAG00000001505)	JH556814.1	1,074,199 - 1,093,363 on strand -	chloride channel 7
	arhgdig (ENSXMAG00000001493)	JH556814.1	1,051,891 - 1,060,065 on strand -	Rho GDP dissociation inhibitor (GDI) gamma
	rpusd1 (ENSXMAG00000001485)	JH556814.1	1,042,129 - 1,045,789 on strand -	RNA pseudouridylate synthase domain containing 1
	slc25a17 (ENSXMAG00000001478)	JH556814.1	1,036,896 - 1,041,340 on strand -	solute carrier family 25 (mitochondrial carrier; peroxisomal membrane protein), member 17
	znf598 (ENSXMAG00000001469)	JH556814.1	1,021,726 - 1,036,475 on strand -	zinc finger protein 598
	gfer (ENSXMAG00000001468)	JH556814.1	1,014,274 - 1,016,145 on strand +	growth factor, augmenter of liver regeneration (ERV1 homolog, S. cerevisiae)
	drg2 (ENSXMAG00000001442)	JH556814.1	1,007,823 - 1,013,058 on strand -	developmentally regulated GTP binding protein 2
	ENSXMAG00000001416	JH556814.1	954,069 - 992,704 on strand -
	llgl1 (ENSXMAG00000001346)	JH556814.1	916,311 - 952,985 on strand -	lethal giant larvae homolog 1 (Drosophila)
	flii (ENSXMAG00000001281)	JH556814.1	898,998 - 915,435 on strand +	flightless I actin binding protein
	desi1a (ENSXMAG00000001279)	JH556814.1	889,614 - 896,947 on strand -	desumoylating isopeptidase 1a
	ENSXMAG00000001278	JH556814.1	767,586 - 855,308 on strand +
	ENSXMAG00000001274	JH556814.1	709,795 - 732,062 on strand +
	ccdc97 (ENSXMAG00000001268)	JH556814.1	695,433 - 698,927 on strand -	coiled-coil domain containing 97
	ENSXMAG00000020269	JH556814.1	669,576 - 670,400 on strand +
	ENSXMAG00000001264	JH556814.1	662,146 - 665,139 on strand +
	ENSXMAG00000001258	JH556814.1	651,077 - 656,662 on strand +
	Medaka
	Nome do gene	Cromossomo	Distancia	Nome da proteina
	cacna1ha (ENSORLG00000012672)	8	16,587,845 - 16,644,792 on strand +	calcium channel, voltage-dependent, T type, alpha 1H subunit a
	grin2aa (ENSORLG00000012714)	8	16,787,162 - 16,868,203 on strand +	glutamate receptor, ionotropic, N-methyl D-aspartate 2A, a
	ENSORLG00000012720	8	16,913,391 - 16,913,579 on strand -
	ENSORLG00000012727	8	16,964,875 - 16,965,756 on strand -
	ENSORLG00000012733	8	16,999,272 - 17,010,788 on strand -
	cacng3b (ENSORLG00000012756)	8	17,278,915 - 17,340,110 on strand +	calcium channel, voltage-dependent, gamma subunit 3b
	ENSORLG00000012764	8	17,408,514 - 17,418,266 on strand +
	ENSORLG00000012775	8	17,443,336 - 17,470,390 on strand +
	tnrc6a (ENSORLG00000012798)	8	17,531,205 - 17,566,422 on strand +	trinucleotide repeat containing 6a
	ndufab1a (ENSORLG00000012806)	8	17,572,988 - 17,575,479 on strand -	NADH dehydrogenase (ubiquinone) 1, alpha/beta subcomplex, 1a
	dctn5 (ENSORLG00000012821)	8	17,586,279 - 17,589,603 on strand +	dynactin 5
	C16orf72 (1 of many) (ENSORLG00000012830)	8	17,592,623 - 17,602,808 on strand -	chromosome 16 open reading frame 72
	usp7 (ENSORLG00000012876)	8	17,608,623 - 17,634,462 on strand +	ubiquitin specific peptidase 7 (herpes virus-associated)
	slc2a6 (ENSORLG00000012895)	8	17,647,956 - 17,657,462 on strand -	solute carrier family 2 (facilitated glucose transporter), member 6
	clcn7 (ENSORLG00000012962)	8	17,662,520 - 17,676,835 on strand +	chloride channel 7
	arhgdig (ENSORLG00000012994)	8	17,683,617 - 17,705,923 on strand +	Rho GDP dissociation inhibitor (GDI) gamma
	rpusd1 (ENSORLG00000013009)	8	17,709,870 - 17,711,917 on strand +	RNA pseudouridylate synthase domain containing 1
	slc25a17 (ENSORLG00000013026)	8	17,713,376 - 17,717,505 on strand +	solute carrier family 25 (mitochondrial carrier; peroxisomal membrane protein), member 17
	znf598 (ENSORLG00000013053)	8	17,721,467 - 17,733,157 on strand +	zinc finger protein 598
	syngr3b (ENSORLG00000013084)	8	17,741,333 - 17,752,020 on strand -	synaptogyrin 3b
	gfer (ENSORLG00000013089)	8	17,761,177 - 17,762,274 on strand -	growth factor, augmenter of liver regeneration (ERV1 homolog, S. cerevisiae)
	drg2 (ENSORLG00000013116)	8	17,762,301 - 17,770,989 on strand +	developmentally regulated GTP binding protein 2
	MYO15A (1 of many) (ENSORLG00000013162)	8	17,793,979 - 17,855,533 on strand +	myosin XVA
	llgl1 (ENSORLG00000013225)	8	17,857,367 - 17,892,524 on strand +	lethal giant larvae homolog 1 (Drosophila)
	ENSORLG00000013230	8	17,902,641 - 17,903,530 on strand -
	desi1a (ENSORLG00000013243)	8	17,908,474 - 17,915,244 on strand +	desumoylating isopeptidase 1a
	ENSORLG00000013248	8	17,985,746 - 17,994,080 on strand -
	ENSORLG00000013253	8	18,022,205 - 18,035,076 on strand -
	ENSORLG00000013264	8	18,146,890 - 18,147,438 on strand -
	MKL1 (1 of many) (ENSORLG00000013273)	8	18,243,878 - 18,284,251 on strand -	megakaryoblastic leukemia (translocation) 1
	ENSORLG00000013276	8	18,286,934 - 18,287,784 on strand -
	Zebrafish
	Nome do gene	Cromossomo	Distancia	Nome da proteina
	rab40c (ENSDARG00000061208)	3	26,620,990 - 26,656,559 on strand -	RAB40c, member RAS oncogene family
	pigq (ENSDARG00000038097)	3	26,661,675 - 26,675,161 on strand -	phosphatidylinositol glycan anchor biosynthesis, class Q
	socs1a (ENSDARG00000038095)	3	26,682,187 - 26,684,082 on strand +	suppressor of cytokine signaling 1a
	clec16a (ENSDARG00000038094)	3	26,692,917 - 26,775,785 on strand -	C-type lectin domain family 16, member A
	dexi (ENSDARG00000055474)	3	26,774,153 - 26,775,480 on strand +	Dexi homolog (mouse)
	ciita (ENSDARG00000090851)	3	26,778,107 - 26,790,604 on strand -	class II, major histocompatibility complex, transactivator
	nubp1 (ENSDARG00000055472)	3	26,800,839 - 26,847,922 on strand -	nucleotide binding protein 1 (MinD homolog, E. coli
	emp2 (ENSDARG00000044588)	3	26,896,939 - 26,925,338 on strand +	epithelial membrane protein 2
	atf7ip2 (ENSDARG00000089698)	3	26,927,619 - 26,941,337 on strand -	activating transcription factor 7 interacting protein 2
	grin2aa (ENSDARG00000034493)	3	26,940,907 - 27,146,853 on strand +	glutamate receptor, ionotropic, N-methyl D-aspartate 2A, a
	zgc:66160 (ENSDARG00000055383)	3	27,464,195 - 27,470,970 on strand -	zgc:66160
	usp7 (ENSDARG00000073710)	3	27,475,663 - 27,509,981 on strand +	ubiquitin specific peptidase 7 (herpes virus-associated)
	ptx4 (ENSDARG00000038072)	3	27,511,236 - 27,532,605 on strand +	pentraxin 4, long
	si:ch211-157c3.4 (ENSDARG00000087093)	3	27,511,544 - 27,517,003 on strand -	si:ch211-157c3.4
	clcn7 (ENSDARG00000019556)	3	27,534,318 - 27,565,321 on strand +	chloride channel 7
	arhgdig (ENSDARG00000004034)	3	27,582,768 - 27,638,390 on strand +	Rho GDP dissociation inhibitor (GDI) gamma
	eci1 (ENSDARG00000018002)	3	27,639,268 - 27,646,829 on strand +	enoyl-CoA delta isomerase 1
	dnase1 (ENSDARG00000012539)	3	27,648,133 - 27,653,615 on strand -	deoxyribonuclease I
	nat15 (ENSDARG00000061185)	3	27,655,759 - 27,665,509 on strand +	N-acetyltransferase 15 (GCN5-related, putative)
	carhsp1 (ENSDARG00000053129)	3	27,667,252 - 27,700,973 on strand +	calcium regulated heat stable protein 1
	abat (ENSDARG00000006031)	3	27,705,225 - 27,749,387 on strand -	4-aminobutyrate aminotransferase
	mettl22 (ENSDARG00000077863)	3	27,751,592 - 27,784,709 on strand -	methyltransferase like 22
	TMEM114 (ENSDARG00000038089	3	27,799,096 - 27,820,842 on strand +	transmembrane protein 114
	rbfox1 (ENSDARG00000014746)	3	27,853,316 - 28,297,356 on strand -	RNA binding protein, fox-1 homolog (C. elegans) 1
	sept12 (ENSDARG00000019191)	3	28,371,577 - 28,496,605 on strand +	septin 12
	fbxl16 (ENSDARG00000060915)	3	28,503,625 - 28,534,449 on strand -	F-box and leucine-rich repeat protein 16
	gsg1l (ENSDARG00000037390)	3	28,587,975 - 28,619,653 on strand -	gsg1-like
	si:ch211-76l23.4 (ENSDARG00000096242)	3	28,692,579 - 28,697,400 on strand -	si:ch211-76l23.4
	flr (ENSDARG00000038024)	3	28,700,608 - 28,719,977 on strand +	fleer
	si:ch211-76l23.7 (ENSDARG00000075345)	3	28,720,333 - 28,726,353 on strand -	si:ch211-76l23.7
	alg1 (ENSDARG00000054963)	3	28,729,441 - 28,738,798 on strand +	ALG1, chitobiosyldiphosphodolichol beta-mannosyltransferase
	Human
	Nome do gene	Cromossomo	Distancia	Nome da proteina
	POLR3K (ENSG00000161980)	16	46,407 - 53,628 on strand -	RNA polymerase III subunit K
	SNRNP25 (ENSG00000161981)	16	53,010 - 57,669 on strand +	small nuclear ribonucleoprotein U11/U12 subunit 25
	RHBDF1 (ENSG00000007384)	16	58,059 - 76,355 on strand -	rhomboid 5 homolog 1
	MPG (ENSG00000103152)	16	77,007 - 85,853 on strand +	N-methylpurine DNA glycosylase
	NPRL3 (ENSG00000103148)	16	84,271 - 138,860 on strand -	NPR3 like, GATOR1 complex subunit
	HBZ (ENSG00000130656)	16	152,687 - 154,503 on strand +	hemoglobin subunit zeta
	HBM (ENSG00000206177)	16	153,892 - 166,768 on strand +	hemoglobin subunit mu
	HBA2 (ENSG00000188536)	16	172,847 - 173,710 on strand +	hemoglobin subunit alpha 2
	HBA1 (ENSG00000206172)	16	176,680 - 177,522 on strand +	hemoglobin subunit alpha 1
	HBQ1 (ENSG00000086506)	16	180,453 - 181,181 on strand +	hemoglobin subunit theta 1
	LUC7L (ENSG00000007392)	16	188,969 - 229,463 on strand -	LUC7 like
	FAM234A (ENSG00000167930)	16	234,546 - 268,971 on strand +	family with sequence similarity 234 member A
	AC004754.3 (ENSG00000269881)	16	249,547 - 269,943 on strand +
	RGS11 (ENSG00000076344)	16	268,301 - 275,980 on strand -	regulator of G-protein signaling 11
	ARHGDIG (ENSG00000242173)	16	268,727 - 283,010 on strand +	Rho GDP dissociation inhibitor gamma
	PDIA2 (ENSG00000185615)	16	283,152 - 287,215 on strand +	protein disulfide isomerase family A member 2
	AXIN1 (ENSG00000103126)	16	287,440 - 352,673 on strand -	axin 1
	MRPL28 (ENSG00000086504)	16	367,384 - 370,527 on strand -	mitochondrial ribosomal protein L28
	TMEM8A (ENSG00000129925)	16	370,773 - 387,113 on strand -	transmembrane protein 8A
	NME4 (ENSG00000103202)	16	396,725 - 410,367 on strand +	NME/NM23 nucleoside diphosphate kinase 4
	DECR2 (ENSG00000242612)	16	401,826 - 412,487 on strand +	2,4-dienoyl-CoA reductase 2, peroxisomal
	RAB11FIP3 (ENSG00000090565)	16	425,619 - 523,011 on strand +	RAB11 family interacting protein 3
	CAPN15 (ENSG00000103326)	16	527,717 - 554,636 on strand +	calpain 15
	PRR35 (ENSG00000161992)	16	560,422 - 565,528 on strand +	proline rich 35
	PIGQ (ENSG00000007541)	16	566,995 - 584,136 on strand +	phosphatidylinositol glycan anchor biosynthesis class Q
	NHLRC4 (ENSG00000257108)	16	566,996 - 569,495 on strand +	NHL repeat containing 4
	RAB40C (ENSG00000197562)	16	589,357 - 629,272 on strand +	RAB40C, member RAS oncogene family
	WFIKKN1 (ENSG00000127578)	16	629,239 - 634,116 on strand +	WAP, follistatin/kazal, immunoglobulin, kunitz and netrin domain containing 1
	METTL26 (ENSG00000130731)	16	634,427 - 636,366 on strand -	methyltransferase like 26
	MCRIP2 (ENSG00000172366)	16	636,817 - 648,474 on strand +	MAPK regulated corepressor interacting protein 2
	Orangutan
	Nome do gene	Cromossomo	Distancia	Nome da proteina
	POLR3K (ENSPPYG00000006893)	16	24,869 - 30,393 on strand -	RNA polymerase III subunit K
	SNRNP25 (ENSPPYG00000006894)	16	29,816 - 34,490 on strand +	small nuclear ribonucleoprotein U11/U12 subunit 25
	RHBDF1 (ENSPPYG00000006895)	16	32,008 - 49,854 on strand -	rhomboid 5 homolog 1
	MPG (ENSPPYG00000006896)	16	54,598 - 67,729 on strand +	N-methylpurine DNA glycosylase
	NPRL3 (ENSPPYG00000006897)	16	66,730 - 123,114 on strand -	NPR3 like, GATOR1 complex subunit
	HBM (ENSPPYG00000006898)	16	152,493 - 153,258 on strand +	hemoglobin subunit mu
	ENSPPYG00000006899	16	166,789 - 167,660 on strand +
	HBQ1 (ENSPPYG00000006900)	16	170,735 - 172,577 on strand +	hemoglobin subunit theta 1
	LUC7L (ENSPPYG00000006901)	16	182,815 - 221,546 on strand -	LUC7 like
	ENSPPYG00000006902	16	244,481 - 266,399 on strand +
	RGS11 (ENSPPYG00000006903)	16	266,816 - 273,306 on strand -	regulator of G-protein signaling 11
	ARHGDIG (ENSPPYG00000029691)	16	279,977 - 281,989 on strand +	Rho GDP dissociation inhibitor gamma
	PDIA2 (ENSPPYG00000006904)	16	282,255 - 286,327 on strand +	Pongo abelii protein disulfide isomerase family A, member 2
	AXIN1 (ENSPPYG00000006905)	16	286,554 - 352,831 on strand -	axin 1
	MRPL28 (ENSPPYG00000006906)	16	374,616 - 377,678 on strand -	mitochondrial ribosomal protein L28
	TMEM8A (ENSPPYG00000006907)	16	380,378 - 389,456 on strand -	transmembrane protein 8A
	NME4 (ENSPPYG00000006908)	16	404,377 - 408,407 on strand +	NME/NM23 nucleoside diphosphate kinase 4
	DECR2 (ENSPPYG00000006909)	16	409,934 - 419,561 on strand +	peroxisomal 2,4-dienoyl-CoA reductase
	RAB11FIP3 (ENSPPYG00000006910)	16	471,033 - 535,729 on strand +	RAB11 family interacting protein 3
	CAPN15 (ENSPPYG00000006911)	16	542,963 - 568,190 on strand +	calpain 15
	PRR35 (ENSPPYG00000006912)	16	580,609 - 587,955 on strand +	proline rich 35
	PIGQ (ENSPPYG00000006913)	16	594,025 - 602,749 on strand +	phosphatidylinositol glycan anchor biosynthesis class Q
	RAB40C (ENSPPYG00000006914)	16	609,482 - 646,095 on strand +	RAB40C, member RAS oncogene family
	WFIKKN1 (ENSPPYG00000006915)	16	649,379 - 653,446 on strand +	WAP, follistatin/kazal, immunoglobulin, kunitz and netrin domain containing 1
	METTL26 (ENSPPYG00000006916)	16	653,916 - 655,642 on strand -	methyltransferase like 26
	ENSPPYG00000006917	16	663,617 - 673,055 on strand +
	WDR90 (ENSPPYG00000006918)	16	674,220 - 692,305 on strand +	WD repeat domain 90
	Mouse
	Nome do gene	Cromossomo	Distancia	Nome da proteina
	Syngap1 (ENSMUSG00000067629)	17	26,941,253 - 26,972,434 on strand +	synaptic Ras GTPase activating protein 1 homolog (rat)
	Cuta (ENSMUSG00000024194)	17	26,937,973 - 26,939,478 on strand -	cutA divalent cation tolerance homolog
	Phf1 (ENSMUSG00000024193)	17	26,933,127 - 26,937,890 on strand +	PHD finger protein 1
	Kifc5b (ENSMUSG00000024301)	17	26,917,091 - 26,932,579 on strand +	kinesin family member C5B
	Nkx2-5 (ENSMUSG00000015579)	17	26,838,664 - 26,841,565 on strand -	NK2 homeobox 5
	Bnip1 (ENSMUSG00000024191)	17	26,781,079 - 26,792,565 on strand +	BCL2/adenovirus E1B interacting protein 1
	Crebrf (ENSMUSG00000048249)	17	26,715,650 - 26,776,635 on strand +	CREB3 regulatory factor
	Atp6v0e (ENSMUSG00000015575)	17	26,676,396 - 26,699,644 on strand +	ATPase, H+ transporting, lysosomal V0 subunit E
	Ergic1 (ENSMUSG00000001576)	17	26,561,489 - 26,656,931 on strand +	endoplasmic reticulum-golgi intermediate compartment (ERGIC) 1
	Gm8225 (ENSMUSG00000068604)	17	26,542,760 - 26,543,715 on strand +	predicted gene 8225
	Dusp1 (ENSMUSG00000024190)	17	26,505,590 - 26,508,519 on strand -	dual specificity phosphatase 1
	Neurl1b (ENSMUSG00000034413)	17	26,414,829 - 26,446,349 on strand +	neuralized E3 ubiquitin protein ligase 1B
	Luc7l (ENSMUSG00000024188)	17	26,252,910 - 26,285,504 on strand +	Luc7-like
	Fam234a (ENSMUSG00000024187)	17	26,211,822 - 26,244,223 on strand -	family with sequence similarity 234, member A
	Rgs11 (ENSMUSG00000024186)	17	26,202,951 - 26,211,324 on strand +	regulator of G-protein signaling 11
	Arhgdig (ENSMUSG00000073433)	17	26,196,226 - 26,207,786 on strand -	Rho GDP dissociation inhibitor (GDI) gamma
	Pdia2 (ENSMUSG00000024184)	17	26,195,999 - 26,199,087 on strand -	protein disulfide isomerase associated 2
	Axin1 (ENSMUSG00000024182)	17	26,138,688 - 26,195,811 on strand +	axin 1
	Mrpl28 (ENSMUSG00000024181)	17	26,123,520 - 26,126,613 on strand +	mitochondrial ribosomal protein L28
	Tmem8 (ENSMUSG00000024180)	17	26,113,316 - 26,123,254 on strand +	transmembrane protein 8 (five membrane-spanning domains)
	Gm8186 (ENSMUSG00000049124)	17	26,098,872 - 26,099,257 on strand -	predicted gene 8186
	Nme4 (ENSMUSG00000024177)	17	26,091,734 - 26,095,508 on strand -	NME/NM23 nucleoside diphosphate kinase 4
	Decr2 (ENSMUSG00000036775)	17	26,081,211 - 26,090,329 on strand -	2-4-dienoyl-Coenzyme A reductase 2, peroxisomal
	Rab11fip3 (ENSMUSG00000037098)	17	25,989,036 - 26,069,409 on strand -	RAB11 family interacting protein 3 (class II)
	Capn15 (ENSMUSG00000037326)	17	25,958,364 - 25,985,796 on strand -	calpain 15
	D630044L22Rik (ENSMUSG00000097405)	17	25,951,472 - 25,963,610 on strand +	RIKEN cDNA gene D630044L22 gene
	A930017K11Rik (ENSMUSG00000025727)	17	25,946,387 - 25,952,565 on strand -	RIKEN cDNA A930017K11 gene
	Nhlrc4 (ENSMUSG00000090113)	17	25,942,233 - 25,944,961 on strand -	NHL repeat containing 4
	Pigq (ENSMUSG00000025728)	17	25,926,421 - 25,944,510 on strand -	phosphatidylinositol glycan anchor biosynthesis, class Q
	Rab40c (ENSMUSG00000025730)	17	25,882,114 - 25,919,727 on strand -	Rab40C, member RAS oncogene family
	Wfikkn1 (ENSMUSG00000071192)	17	25,877,630 - 25,880,305 on strand -	WAP, FS, Ig, KU, and NTR-containing protein 1
	Guinea Pig
	Nome do gene	Cromossomo Distancia	Nome de proteina
	TOP3B (ENSCPOG00000001812)	scaffold_4 : 19,910,165 - 19,928,073 on strand -	topoisomerase (DNA) III beta
	ENSCPOG00000027439	scaffold_4 : 19,985,883 - 19,986,291 on strand +
	ENSCPOG00000001658	scaffold_4 : 20,007,934 - 20,026,683 on strand +
	ENSCPOG00000006580	scaffold_4 : 20,036,055 - 20,036,711 on strand -
	IL9R (ENSCPOG00000026125)	scaffold_4 : 20,053,493 - 20,061,981 on strand -	interleukin 9 receptor
	POLR3K (ENSCPOG00000006281)	scaffold_4 : 20,073,527 - 20,075,821 on strand -	RNA polymerase III subunit K
	SNRNP25 (ENSCPOG00000006282)	scaffold_4 : 20,076,039 - 20,078,575 on strand +	small nuclear ribonucleoprotein U11/U12 subunit 25
	RHBDF1 (ENSCPOG00000006289)	scaffold_4 : 20,079,899 - 20,086,911 on strand -	rhomboid 5 homolog 1
	MPG (ENSCPOG00000010312)	scaffold_4 : 20,102,344 - 20,107,792 on strand +	N-methylpurine DNA glycosylase
	NPRL3 (ENSCPOG00000001587)	scaffold_4 : 20,108,617 - 20,154,298 on strand -	NPR3 like, GATOR1 complex subunit
	ENSCPOG00000000267	scaffold_4 : 20,169,103 - 20,169,845 on strand +	Hemoglobin subunit alpha
	HBQ1 (ENSCPOG00000027187)	scaffold_4 : 20,172,300 - 20,172,932 on strand +	hemoglobin subunit theta 1
	LUC7L (ENSCPOG00000014095)	scaffold_4 : 20,183,124 - 20,210,836 on strand -	LUC7 like
	ENSCPOG00000011450	scaffold_4 : 20,246,733 - 20,256,579 on strand +
	RGS11 (ENSCPOG00000011460)	scaffold_4 : 20,259,577 - 20,266,326 on strand -	regulator of G-protein signaling 11
	ARHGDIG (ENSCPOG00000024274)	scaffold_4 : 20,268,877 - 20,270,627 on strand +	Rho GDP dissociation inhibitor gamma
	PDIA2 (ENSCPOG00000011244)	scaffold_4 : 20,270,922 - 20,274,220 on strand +	protein disulfide isomerase family A member 2
	AXIN1 (ENSCPOG00000011250)	scaffold_4 : 20,275,196 - 20,321,934 on strand -	axin 1
	MRPL28 (ENSCPOG00000007176)	scaffold_4 : 20,336,365 - 20,339,800 on strand -	mitochondrial ribosomal protein L28
	TMEM8A (ENSCPOG00000007180)	scaffold_4 : 20,341,378 - 20,350,073 on strand -	transmembrane protein 8A
	NME4 (ENSCPOG00000006496)	scaffold_4 : 20,361,294 - 20,364,242 on strand +	NME/NM23 nucleoside diphosphate kinase 4
	DECR2 (ENSCPOG00000006499)	scaffold_4 : 20,365,817 - 20,372,034 on strand +	2,4-dienoyl-CoA reductase 2, peroxisomal [
	ENSCPOG00000019433	scaffold_4 : 20,413,757 - 20,415,067 on strand +
	ENSCPOG00000008515	scaffold_4 : 20,477,345 - 20,501,475 on strand +
	CAPN15 (ENSCPOG00000022357)	scaffold_4 : 20,524,401 - 20,529,806 on strand +	calpain 15
	NHLRC4 (ENSCPOG00000021016)	scaffold_4 : 20,544,141 - 20,544,551 on strand +	NHL repeat containing 4
	PIGQ (ENSCPOG00000026583)	scaffold_4 : 20,550,337 - 20,559,907 on strand +	phosphatidylinositol glycan anchor biosynthesis class Q
	RAB40C (ENSCPOG00000023164)	scaffold_4 : 20,566,004 - 20,602,355 on strand +	RAB40C, member RAS oncogene family
	WFIKKN1 (ENSCPOG00000025782)	scaffold_4 : 20,606,041 - 20,608,433 on strand +	WAP, follistatin/kazal, immunoglobulin, kunitz and netrin domain containing 1
	METTL26 (ENSCPOG00000002381)	scaffold_4 : 20,609,007 - 20,610,152 on strand -	methyltransferase like 26
	MCRIP2 (ENSCPOG00000002382)	scaffold_4 : 20,623,032 - 20,627,878 on strand +	MAPK regulated corepressor interacting protein 2
	Dog
	Nome do gene	Cromossomo Distancia	Nome da proteina
	POLR3K (ENSCAFG00000019715)	6 : 40,417,066 - 40,419,589 on strand +	RNA polymerase III subunit K
	SNRNP25 (ENSCAFG00000032338)	6 : 40,410,592 - 40,416,970 on strand -	small nuclear ribonucleoprotein U11/U12 subunit 25
	ENSCAFG00000028465	6 : 40,398,733 - 40,399,641 on strand -
	RHBDF1 (ENSCAFG00000019703)	6 : 40,396,111 - 40,413,358 on strand +	rhomboid 5 homolog 1
	MPG (ENSCAFG00000019700)	6 : 40,389,096 - 40,394,808 on strand -	N-methylpurine DNA glycosylase
	ENSCAFG00000024468	6 : 40,377,079 - 40,377,873 on strand -
	NPRL3 (ENSCAFG00000019696)	6 : 40,352,963 - 40,389,489 on strand +	NPR3 like, GATOR1 complex subunit
	ENSCAFG00000028569	6 : 40,342,562 - 40,343,504 on strand -
	ENSCAFG00000031055	6 : 40,331,793 - 40,332,696 on strand -
	HBM (ENSCAFG00000029224)	6 : 40,330,683 - 40,332,438 on strand -	hemoglobin subunit mu
	ENSCAFG00000029904	6 : 40,326,459 - 40,329,857 on strand -
	ENSCAFG00000032615	6 : 40,324,263 - 40,326,351 on strand -
	LUC7L (ENSCAFG00000019689)	6 : 40,274,402 - 40,309,875 on strand +	LUC7 like
	ENSCAFG00000019687	6 : 40,235,627 - 40,271,910 on strand -
	RGS11 (ENSCAFG00000023874)	6 : 40,225,981 - 40,233,303 on strand +	regulator of G-protein signaling 11
	ARHGDIG (ENSCAFG00000015363)	6 : 40,222,103 - 40,223,076 on strand -	Rho GDP dissociation inhibitor gamma
	PDIA2 (ENSCAFG00000015429)	6 : 40,218,664 - 40,221,797 on strand -	protein disulfide isomerase family A member 2
	AXIN1 (ENSCAFG00000019684)	6 : 40,158,250 - 40,218,389 on strand +	axin 1
	MRPL28 (ENSCAFG00000019682)	6 : 40,145,876 - 40,147,777 on strand +	mitochondrial ribosomal protein L28
	TMEM8A (ENSCAFG00000019680)	6 : 40,137,825 - 40,145,809 on strand +	transmembrane protein 8A
	ENSCAFG00000032180	6 : 40,122,402 - 40,122,998 on strand +
	ENSCAFG00000019677	6 : 40,119,854 - 40,122,431 on strand -
	DECR2 (ENSCAFG00000019675)	6 : 40,111,234 - 40,115,713 on strand -	2,4-dienoyl-CoA reductase 2, peroxisomal
	ENSCAFG00000019670	40,020,485 - 40,044,291 on strand -
	CAPN15 (ENSCAFG00000019667)	6 : 39,996,589 - 40,003,460 on strand -	calpain 15
	PRR35 (ENSCAFG00000019663)	6 : 39,986,374 - 39,988,629 on strand -	proline rich 35
	NHLRC4 (ENSCAFG00000032733)	6 : 39,984,087 - 39,984,494 on strand -	NHL repeat containing 4
	ENSCAFG00000019662	6 : 39,971,032 - 39,982,408 on strand -
	WFIKKN1 (ENSCAFG00000019660)	6 : 39,934,171 - 39,936,406 on strand -	WAP, follistatin/kazal, immunoglobulin, kunitz and netrin domain containing 1
	ENSCAFG00000030159	6 : 39,922,253 - 39,922,650 on strand -
	WDR90 (ENSCAFG00000019654)	6 : 39,905,866 - 39,922,320 on strand -	WD repeat domain 90
	Megabat
	Nome do gene	Cromossomo Distancia	Nome da proteina
	POLR3K (ENSPVAG00000000530)	GeneScaffold_2552 : 7,446 - 10,206 on strand -	RNA polymerase III subunit K
	ENSPVAG0000000053	GeneScaffold_2552 : 10,205 - 13,220 on strand +
	RHBDF1 (ENSPVAG00000000532)	GeneScaffold_2552 : 14,296 - 20,294 on strand -	rhomboid 5 homolog 1
	MPG (ENSPVAG00000000533)	GeneScaffold_2552 : 36,233 - 42,531 on strand +	N-methylpurine DNA glycosylase
	NPRL3 (ENSPVAG00000000534)	GeneScaffold_2552 : 44,481 - 78,006 on strand -	NPR3 like, GATOR1 complex subunit
	ENSPVAG00000000535	GeneScaffold_2552 : 85,059 - 86,128 on strand +
	ENSPVAG00000000536	GeneScaffold_2552 : 95,178 - 96,870 on strand +
	HBM (ENSPVAG00000000537)	GeneScaffold_2552 : 97,642 - 98,347 on strand +	hemoglobin subunit mu
	ENSPVAG00000000538	GeneScaffold_2552 : 100,048 - 100,851 on strand +
	ENSPVAG00000000539	GeneScaffold_2552 : 104,257 - 105,060 on strand +
	HBQ1 (ENSPVAG00000000540)	GeneScaffold_2552 : 107,148 - 107,807 on strand +	hemoglobin subunit theta 1
	LUC7L (ENSPVAG00000000541)	GeneScaffold_2552 : 118,633 - 146,648 on strand -	LUC7 like
	ENSPVAG00000000543	GeneScaffold_2552 : 165,344 - 171,592 on strand +
	RGS11 (ENSPVAG00000000545)	GeneScaffold_2552 : 174,627 - 183,452 on strand -	regulator of G-protein signaling 11
	ARHGDIG (ENSPVAG00000000546)	GeneScaffold_2552 : 186,513 - 188,474 on strand +	Rho GDP dissociation inhibitor gamma
	PDIA2 (ENSPVAG00000000547)	GeneScaffold_2552 : 188,842 - 192,205 on strand +	protein disulfide isomerase family A member 2
	AXIN1 (ENSPVAG00000000549)	GeneScaffold_2552 : 193,399 - 242,360 on strand -	axin 1
	MRPL28 (ENSPVAG00000000551)	GeneScaffold_2552 : 258,505 - 261,311 on strand -	mitochondrial ribosomal protein L28
	TMEM8A (ENSPVAG00000000552)	GeneScaffold_2552 : 262,993 - 271,383 on strand -	transmembrane protein 8A
	NME4 (ENSPVAG00000000554)	GeneScaffold_2552 : 277,033 - 280,037 on strand +
	DECR2 (ENSPVAG00000000556)	GeneScaffold_2552 : 281,751 - 285,962 on strand +	2,4-dienoyl-CoA reductase 2, peroxisomal
	RAB11FIP3 (ENSPVAG00000000557)	GeneScaffold_2552 : 332,250 - 366,298 on strand +	RAB11 family interacting protein 3
	CAPN15 (ENSPVAG00000000559)	GeneScaffold_2552 : 389,699 - 396,202 on strand +	calpain 15
	PRR35 (ENSPVAG00000000560)	GeneScaffold_2552 : 406,714 - 411,913 on strand +	proline rich 35
	PIGQ (ENSPVAG00000000561)	GeneScaffold_2552 : 417,251 - 428,993 on strand +	phosphatidylinositol glycan anchor biosynthesis class Q
	RAB40C (ENSPVAG00000000563)	GeneScaffold_2552 : 434,547 - 459,344 on strand +	RAB40C, member RAS oncogene family
	WFIKKN1 (ENSPVAG00000000564)	GeneScaffold_2552 : 461,451 - 463,766 on strand +	WAP, follistatin/kazal, immunoglobulin, kunitz and netrin domain containing 1
	METTL26 (ENSPVAG00000000565)	GeneScaffold_2552 : 465,408 - 466,195 on strand -	methyltransferase like 26
	Microbat
	Nome do gene	Cromossomo Distancia	Nome da proteina
	ENSMLUG00000023926	GL430265 : 609,988 - 618,824 on strand +	Uncharacterized protein
	HBZ (ENSMLUG00000026396)	GL430265 : 583,418 - 590,035 on strand -	hemoglobin subunit zeta
	ENSMLUG00000027635	GL430265 : 578,935 - 579,762 on strand -	Uncharacterized protein
	ENSMLUG00000027489	GL430265 : 574,225 - 575,054 on strand -	Uncharacterized protein
	ENSMLUG00000028677	GL430265 : 568,903 - 569,823 on strand +	Uncharacterized protein
	HBQ1 (ENSMLUG00000025171)	GL430265 : 568,050 - 568,504 on strand -	hemoglobin subunit theta 1
	ENSMLUG00000012452	GL430265 : 563,105 - 564,025 on strand +	Uncharacterized protein
	LUC7L (ENSMLUG00000017341)	GL430265 : 516,970 - 547,782 on strand +	LUC7 like
	ENSMLUG00000010480	GL430265 : 482,938 - 492,693 on strand -	Uncharacterized protein
	RGS11 (ENSMLUG00000010526)	GL430265 : 472,499 - 480,186 on strand +	regulator of G-protein signaling 11
	ARHGDIG (ENSMLUG00000009896)	GL430265 : 463,320 - 466,147 on strand -	Rho GDP dissociation inhibitor gamma
	PDIA2 (ENSMLUG00000009910)	GL430265 : 459,522 - 462,944 on strand -	protein disulfide isomerase family A member 2
	AXIN1 (ENSMLUG00000009934)	GL430265 : 386,990 - 458,353 on strand +	axin 1
	MRPL28 (ENSMLUG00000010009)	GL430265 : 367,977 - 370,624 on strand +	mitochondrial ribosomal protein L28
	ENSMLUG00000010029	GL430265 : 359,793 - 366,109 on strand +	Uncharacterized protein
	ENSMLUG00000010061	GL430265 : 344,038 - 347,008 on strand -	Nucleoside diphosphate kinase
	DECR2 (ENSMLUG00000010075)	GL430265 : 336,665 - 341,648 on strand -	2,4-dienoyl-CoA reductase 2, peroxisomal
	ENSMLUG00000023907	GL430265 : 287,187 - 287,426 on strand +
	ENSMLUG00000010103	GL430265 : 225,489 - 250,419 on strand -
	CAPN15 (ENSMLUG00000010159)	GL430265 : 193,294 - 199,314 on strand -	calpain 15
	PRR35 (ENSMLUG00000013444)	GL430265 : 180,544 - 182,541 on strand -	proline rich 35
	NHLRC4 (ENSMLUG00000029944)	GL430265 : 177,178 - 177,700 on strand -	NHL repeat containing 4
	PIGQ (ENSMLUG00000010203)	GL430265 : 161,222 - 171,847 on strand -	phosphatidylinositol glycan anchor biosynthesis class Q
	RAB40C (ENSMLUG00000010258)	GL430265 : 123,081 - 153,878 on strand -	RAB40C, member RAS oncogene family
	WFIKKN1 (ENSMLUG00000010278)	GL430265 : 118,087 - 120,339 on strand -	WAP, follistatin/kazal, immunoglobulin, kunitz and netrin domain containing 1
	METTL26 (ENSMLUG00000007016)	GL430265 : 115,972 - 117,395 on strand +	methyltransferase like 26
	Opossum
	Nome do gene	Cromossomo Distancia	Nome da proteina
	PDPK1 (ENSMODG00000016600)	6 : 148,805,035 - 148,915,978 on strand -	3-phosphoinositide dependent protein kinase 1
	ENSMODG00000016602	6 : 148,962,149 - 148,968,371 on strand +	Uncharacterized protein
	IL9R (ENSMODG00000028058)	6 : 149,028,840 - 149,064,902 on strand -	interleukin 9 receptor
	RHBDF1 (ENSMODG00000016619)	6 : 149,094,853 - 149,132,408 on strand -	rhomboid 5 homolog 1
	SNRNP25 (ENSMODG00000016609)	6 : 149,109,226 - 149,112,978 on strand +	small nuclear ribonucleoprotein U11/U12 subunit 25
	MPG (ENSMODG00000016624)	6 : 149,149,519 - 149,280,055 on strand +	N-methylpurine DNA glycosylase
	NPRL3 (ENSMODG00000016627)	6 : 149,278,880 - 149,352,922 on strand -	NPR3 like, GATOR1 complex subunit
	HBA (ENSMODG00000016635)	6 : 149,372,272 - 149,425,873 on strand +	hemoglobin subunit alpha
	ENSMODG00000024539	6 : 149,374,307 - 149,398,530 on strand -	Uncharacterized protein
	ENSMODG00000016631	6 : 149,396,422 - 149,399,266 on strand +	Uncharacterized protein
	HBQ1 (ENSMODG00000016633)	6 : 149,404,705 - 149,406,733 on strand +	hemoglobin subunit theta 1
	ENSMODG00000016637	6 : 149,445,798 - 149,447,414 on strand +	Uncharacterized protein
	LUC7L (ENSMODG00000016644)	6 : 149,455,517 - 149,500,131 on strand -	LUC7 like
	ENSMODG00000016651	6 : 149,542,774 - 149,634,493 on strand +	Uncharacterized protein
	RGS11 (ENSMODG00000016655)	6 : 149,636,861 - 149,659,608 on strand -	regulator of G-protein signaling 11
	ARHGDIG (ENSMODG00000016657)	6 : 149,675,108 - 149,695,843 on strand +	Rho GDP dissociation inhibitor gamma
	PDIA2 (ENSMODG00000016662)	6 : 149,695,932 - 149,706,294 on strand +	protein disulfide isomerase family A member 2
	AXIN1 (ENSMODG00000016665)	6 : 149,708,115 - 149,897,336 on strand -	axin 1
	MRPL28 (ENSMODG00000016666)	6 : 149,959,692 - 149,966,747 on strand -	mitochondrial ribosomal protein L28
	ENSMODG00000016669	6 : 149,972,847 - 149,994,419 on strand -
	NME4 (ENSMODG00000016672)	6 : 150,025,911 - 150,041,989 on strand +	NME/NM23 nucleoside diphosphate kinase 4
	DECR2 (ENSMODG00000016674)	6 : 150,084,790 - 150,122,508 on strand +	2,4-dienoyl-CoA reductase 2, peroxisomal
	RAB11FIP3 (ENSMODG00000016678)	6 : 150,258,839 - 150,344,169 on strand +	RAB11 family interacting protein 3
	CAPN15 (ENSMODG00000016682)	6 : 150,406,352 - 150,482,271 on strand +	calpain 15
	ENSMODG00000027467	6 : 150,525,893 - 150,526,903 on strand -	Uncharacterized protein
	ENSMODG00000016686	6 : 150,551,668 - 150,571,577 on strand +
	PIGQ (ENSMODG00000016688)	6 : 150,576,215 - 150,633,368 on strand +	phosphatidylinositol glycan anchor biosynthesis class Q
	RAB40C (ENSMODG00000016700)	6 : 150,666,230 - 150,769,808 on strand +	RAB40C, member RAS oncogene family
	WFIKKN1 (ENSMODG00000016704)	6 : 150,774,802 - 150,779,739 on strand +	WAP, follistatin/kazal, immunoglobulin, kunitz and netrin domain containing 1
	METTL26 (ENSMODG00000016707)	6 : 150,780,119 - 150,786,630 on strand -	methyltransferase like 26
	MCRIP2 (ENSMODG00000016708)	6 : 150,838,586 - 150,867,385 on strand +	MAPK regulated corepressor interacting protein 2
	Chicken
	Nome do gene	Cromossomo Distancia	Nome da proteina
	CDIP1 (ENSGALG00000036502)	14 : 12,461,091 - 12,470,750 on strand +	Gallus gallus cell death-inducing p53 target 1 (CDIP1), mRNA
	ENSGALG00000035115	14 : 12,456,914 - 12,459,658 on strand -
	ENSGALG00000029737	14 : 12,454,648 - 12,455,037 on strand -
	UBALD1 (ENSGALG00000007619)	14 : 12,450,125 - 12,455,760 on strand +	UBA like domain containing 1
	MGRN1 (ENSGALG00000037492)	14 : 12,399,639 - 12,448,114 on strand -	mahogunin ring finger 1
	SDOS (ENSGALG00000039779)	14 : 12,396,961 - 12,399,421 on strand -	Protein syndesmos
	ENSGALG00000042322	14 : 12,387,144 - 12,392,905 on strand +
	C7orf26 (ENSGALG00000034380)	14 : 12,372,238 - 12,379,190 on strand +	chromosome 7 open reading frame 26
	DNASE1 (ENSGALG00000041066)	14 : 12,367,583 - 12,371,618 on strand -	Gallus gallus deoxyribonuclease I (DNASE1), mRNA.
	ECI1 (ENSGALG00000031563)	14 : 12,356,793 - 12,361,719 on strand +	Gallus gallus enoyl-CoA delta isomerase 1 (ECI1), mRNA.
	CLCN7 (ENSGALG00000030826)	14 : 12,338,071 - 12,354,779 on strand -	Gallus gallus chloride channel, voltage-sensitive 7 (CLCN7), mRNA.
	ENSGALG00000032279	14 : 12,336,513 - 12,337,262 on strand +
	LUC7L (ENSGALG00000037983)	14 : 12,317,805 - 12,324,721 on strand -	LUC7 like
	ENSGALG00000031303	14 : 12,295,364 - 12,314,108 on strand -
	RGS11 (ENSGALG00000040648)	14 : 12,289,815 - 12,294,043 on strand +	regulator of G-protein signaling 11
	ARHGDIG (ENSGALG00000036819)	14 : 12,286,477 - 12,288,978 on strand -	Rho GDP dissociation inhibitor gamma
	PDIA2 (ENSGALG00000040070)	14 : 12,282,289 - 12,286,205 on strand -	protein disulfide isomerase family A member 2
	AXIN1 (ENSGALG00000029402)	14 : 12,212,109 - 12,280,905 on strand +	Gallus gallus axin 1 (AXIN1), mRNA
	MRPL28 (ENSGALG00000007473)	14 : 12,187,984 - 12,191,132 on strand +	Gallus gallus mitochondrial ribosomal protein L28 (MRPL28), mRNA
	ENSGALG00000026188	14 : 12,176,496 - 12,188,297 on strand +
	HBAA (ENSGALG00000043234)	14 : 12,163,617 - 12,164,434 on strand +	Gallus gallus hemoglobin, alpha 1 (HBAA), mRNA.
	HBAD (ENSGALG00000031597)	14 : 12,160,597 - 12,161,521 on strand +	Hemoglobin subunit alpha-D
	ENSGALG00000032560	14 : 12,157,827 - 12,158,420 on strand -
	HBZ (ENSGALG00000023740)	14 : 12,156,905 - 12,158,534 on strand +	Hemoglobin subunit pi
	NPRL3 (ENSGALG00000007456)	14 : 12,111,199 - 12,152,564 on strand -	NPR3 like, GATOR1 complex subunit
	MPG (ENSGALG00000028691)	14 : 12,094,813 - 12,108,296 on strand +	N-methylpurine DNA glycosylase
	RHBDF1 (ENSGALG00000007434)	14 : 12,040,976 - 12,061,073 on strand -	rhomboid 5 homolog 1
	SNRNP25 (ENSGALG00000026559)	14 : 12,037,989 - 12,040,508 on strand +	small nuclear ribonucleoprotein U11/U12 subunit 25
	POLR3K (ENSGALG00000017681)	14 : 12,037,480 - 12,037,963 on strand -	RNA polymerase III subunit K
	GTF3C1 (ENSGALG00000007387)	14 : 11,999,148 - 12,037,184 on strand +	general transcription factor IIIC subunit 1
	KIAA0556 (ENSGALG00000043363)	14 : 11,946,755 - 11,997,989 on strand -	KIAA0556
	Turkey
	Nome do gene	Cromossomo Distancia	Nome da proteina
	ENSMGAG00000009203	16 : 12,985,244 - 12,988,702 on strand -
	CDIP1 (ENSMGAG00000009193)	16 : 12,969,974 - 12,975,474 on strand +	cell death inducing p53 target 1
	ENSMGAG00000009188	16 : 12,961,534 - 12,964,139 on strand -
	MGRN1 (ENSMGAG00000009163)	16 : 12,907,499 - 12,947,691 on strand -	mahogunin ring finger 1
	NAA60 (ENSMGAG00000009159)	16 : 12,896,710 - 12,902,560 on strand +	N(alpha)-acetyltransferase 60, NatF catalytic subunit
	C7orf26 (ENSMGAG00000009153)	16 : 12,861,699 - 12,867,678 on strand +	chromosome 7 open reading frame 26
	DNASE1L2 (ENSMGAG00000009109)	16 : 12,851,427 - 12,861,012 on strand -	deoxyribonuclease 1 like 2
	ECI1 (ENSMGAG00000009080)	16 : 12,846,971 - 12,851,175 on strand +	enoyl-CoA delta isomerase 1
	PTX4 (ENSMGAG00000009077)	16 : 12,842,526 - 12,844,085 on strand -	pentraxin 4
	CLCN7 (ENSMGAG00000008986)	16 : 12,824,379 - 12,973,431 on strand -	chloride voltage-gated channel 7
	LUC7L (ENSMGAG00000008960)	16 : 12,800,959 - 12,815,911 on strand -	LUC7 like
	ENSMGAG00000008900	16 : 12,764,768 - 12,794,634 on strand -	Uncharacterized protein
	RGS11 (ENSMGAG00000008871)	16 : 12,757,369 - 12,761,222 on strand +	regulator of G-protein signaling 11
	PDIA2 (ENSMGAG00000008956)	16 : 12,755,108 - 12,775,200 on strand -	protein disulfide isomerase family A member 2
	AXIN1 (ENSMGAG00000008924)	16 : 12,686,109 - 12,752,845 on strand +	axin 1
	ARHGDIG (ENSMGAG00000008858)	16 : 12,683,286 - 12,684,980 on strand -	Rho GDP dissociation inhibitor gamma
	ENSMGAG00000008848	16 : 12,659,029 - 12,661,321 on strand +
	ENSMGAG00000008833	16 : 12,645,007 - 12,655,503 on strand +
	ENSMGAG00000008823	16 : 12,632,771 - 12,633,561 on strand +	Uncharacterized protein
	HBM (ENSMGAG00000008803)	16 : 12,629,075 - 12,629,931 on strand +	hemoglobin subunit m
	HBZ (ENSMGAG00000008793)	16 : 12,622,730 - 12,624,375 on strand +	hemoglobin subunit zeta
	NPRL3 (ENSMGAG00000008762)	16 : 12,579,248 - 12,617,013 on strand -	NPR3 like, GATOR1 complex subunit
	MPG (ENSMGAG00000008758)	16 : 12,568,750 - 12,576,380 on strand +	N-methylpurine DNA glycosylase
	RHBDF1 (ENSMGAG00000008719)	16 : 12,506,627 - 12,535,486 on strand -	rhomboid 5 homolog 1
	ENSMGAG00000016362	16 : 12,498,026 - 12,502,182 on strand +	Uncharacterized protein
	ENSMGAG00000008640	16 : 12,463,556 - 12,487,654 on strand +	Uncharacterized protein
	KIAA0556 (ENSMGAG00000008690)	16 : 12,409,067 - 12,462,205 on strand -	KIAA0556
	GSG1L (ENSMGAG00000008627)	16 : 12,340,480 - 12,382,138 on strand +	GSG1 like
	IL20RB (ENSMGAG00000008620)	16 : 12,318,332 - 12,325,901 on strand +	interleukin 20 receptor subunit beta
	RBFOX1 (ENSMGAG00000008606)	16 : 11,396,627 - 11,472,318 on strand -	RNA binding protein, fox-1 homolog 1
	TMEM114 (ENSMGAG00000008604)	16 : 10,459,491 - 10,469,857 on strand +	transmembrane protein 114
	Frog
	Nome do gene	Cromossomo Distancia	Nome da proteina
	rhbdl1 (ENSXETG00000012110)	GL172810.1 : 268 - 8,754 on strand +	rhomboid, veinlet-like 1
	ENSXETG00000033286	GL172810.1 : 11,084 - 17,351 on strand -	uncharacterized protein LOC100145131
	stub1 (ENSXETG00000032697)	GL172810.1 : 18,062 - 26,282 on strand +	E3 ubiquitin-protein ligase CHIP
	jmjd8 (ENSXETG00000012120)	GL172810.1 : 28,172 - 32,374 on strand -	jumonji domain containing 8
	XB-GENE-5729976 (ENSXETG00000012121)	GL172810.1 : 34,586 - 46,046 on strand -	novel C3HC4 type (RING finger) and B-box zinc finger protein with SPRY domain
	tmem8a (ENSXETG00000012131)	GL172810.1 : 54,634 - 72,285 on strand +	transmembrane protein 8A
	RGS11 (ENSXETG00000034304)	GL172810.1 : 107,378 - 158,574 on strand -	regulator of G-protein signaling 11
	arhgdig (ENSXETG00000012139)	GL172810.1 : 181,030 - 221,160 on strand +	Rho GDP dissociation inhibitor (GDI) gamma
	pdia2 (ENSXETG00000012140)	GL172810.1 : 228,590 - 246,602 on strand +	protein disulfide isomerase family A, member 2
	axin1 (ENSXETG00000012143)	GL172810.1 : 252,377 - 276,696 on strand -	axin 1
	mprip (ENSXETG00000012146)	GL172810.1 : 352,162 - 437,040 on strand +	myosin phosphatase Rho interacting protein
	gid4 (ENSXETG00000012151)	GL172810.1 : 448,781 - 455,908 on strand -	GID complex subunit 4 homolog
	atpaf2 (ENSXETG00000012153)	GL172810.1 : 456,073 - 462,000 on strand +	ATP synthase mitochondrial F1 complex assembly factor 2
	lrrc48 (ENSXETG00000012155)	GL172810.1 : 462,156 - 472,534 on strand -	leucine rich repeat containing 48
	tom1l2 (ENSXETG00000012156)	GL172810.1 : 473,033 - 500,423 on strand +	target of myb1 like 2 membrane trafficking protein
	srebf1 (ENSXETG00000012160)	GL172810.1 : 518,694 - 531,671 on strand +	sterol regulatory element binding transcription factor 1
	rai1 (ENSXETG00000012165)	GL172810.1 : 545,978 - 558,338 on strand -	retinoic acid induced 1
	pemt (ENSXETG00000005734)	GL172810.1 : 723,769 - 806,949 on strand +	phosphatidylethanolamine N-methyltransferase
	rasd1 (ENSXETG00000005738)	GL172810.1 : 840,240 - 841,937 on strand +	RAS, dexamethasone-induced 1
	med9 (ENSXETG00000005740)	GL172810.1 : 846,237 - 853,916 on strand -	mediator complex subunit 9
	nt5m (ENSXETG00000005741)	GL172810.1 : 893,291 - 898,853 on strand -	5',3'-nucleotidase, mitochondrial
	cops3 (ENSXETG00000005742)	GL172810.1 : 902,587 - 913,315 on strand +	COP9 signalosome subunit 3
	flcn (ENSXETG00000005745)	GL172810.1 : 916,717 - 924,586 on strand +	folliculin
	Amazon moly
	dexi (ENSPFOG00000019991)	KI519792.1 : 1,350,470 - 1,350,736 on strand +	Dexi homolog (mouse)
	clec16a (ENSPFOG00000009709)	KI519792.1 : 1,310,917 - 1,349,177 on strand -	C-type lectin domain family 16, member A
	SOCS1 (1 of many) (ENSPFOG00000009693)	KI519792.1 : 1,305,790 - 1,306,479 on strand +	suppressor of cytokine signaling 1
	prkcbb (ENSPFOG00000009188)	KI519792.1 : 1,181,897 - 1,278,244 on strand -	protein kinase C, beta b
	cacng3b (ENSPFOG00000009094)	KI519792.1 : 1,154,409 - 1,176,875 on strand -	calcium channel, voltage-dependent, gamma subunit 3b
	ENSPFOG00000023169	KI519792.1 : 1,120,719 - 1,139,027 on strand -
	tnrc6a (ENSPFOG00000008897)	KI519792.1 : 1,071,722 - 1,085,731 on strand -	trinucleotide repeat containing 6a
	ndufab1a (ENSPFOG00000008868)	KI519792.1 : 1,062,599 - 1,065,502 on strand +	NADH dehydrogenase (ubiquinone) 1, alpha/beta subcomplex, 1a
	dctn5 (ENSPFOG00000008779)	KI519792.1 : 1,057,174 - 1,063,263 on strand -	dynactin 5
	C16orf72 (1 of many) (ENSPFOG00000008741)	KI519792.1 : 1,052,477 - 1,057,719 on strand +	chromosome 16 open reading frame 72
	usp7 (ENSPFOG00000008738)	KI519792.1 : 1,023,312 - 1,048,436 on strand -	ubiquitin specific peptidase 7
	si:ch211-157c3.4 (ENSPFOG00000008732)	KI519792.1 : 1,018,928 - 1,020,106 on strand +	si:ch211-157c3.4
	slc2a6 (1 of many) (ENSPFOG00000008637)	KI519792.1 : 1,002,237 - 1,009,085 on strand +	solute carrier family 2 (facilitated glucose transporter), member 6
	slc2a6 (1 of many) (ENSPFOG00000008475)	KI519792.1 : 988,766 - 994,990 on strand +	solute carrier family 2 (facilitated glucose transporter), member 6
	clcn7 (ENSPFOG00000008066)	KI519792.1 : 971,578 - 986,484 on strand -	chloride channel 7
	arhgdig (ENSPFOG00000008002)	KI519792.1 : 946,047 - 970,446 on strand -	Rho GDP dissociation inhibitor (GDI) gamma
	rpusd1 (ENSPFOG00000007946)	KI519792.1 : 939,550 - 943,203 on strand -	RNA pseudouridylate synthase domain containing 1
	slc25a17 (ENSPFOG00000007854)	KI519792.1 : 934,194 - 938,766 on strand -	solute carrier family 25 (mitochondrial carrier; peroxisomal membrane protein), member 17
	znf598 (ENSPFOG00000007766)	KI519792.1 : 920,193 - 933,288 on strand -	zinc finger protein 598
	syngr3a (1 of many) (ENSPFOG00000007740)	KI519792.1 : 910,084 - 915,457 on strand +	synaptogyrin 3a
	drg2 (1 of many) (ENSPFOG00000007572)	KI519792.1 : 900,790 - 905,975 on strand -	developmentally regulated GTP binding protein 2
	syngr3a (1 of many) (ENSPFOG00000007545)	KI519792.1 : 860,849 - 870,604 on strand +	synaptogyrin 3a
	gfer (1 of many) (ENSPFOG00000007519)	KI519792.1 : 851,897 - 860,655 on strand +	growth factor, augmenter of liver regeneration (ERV1 homolog, S. cerevisiae)
	gfer (1 of many) (ENSPFOG00000007716)	KI519792.1 : 849,380 - 910,002 on strand +	growth factor, augmenter of liver regeneration (ERV1 homolog, S. cerevisiae)
	drg2 (1 of many) (ENSPFOG00000007393)	KI519792.1 : 844,901 - 849,608 on strand -	developmentally regulated GTP binding protein 2
	ENSPFOG00000007263	KI519792.1 : 781,721 - 829,876 on strand -
	llgl1 (ENSPFOG00000006863)	KI519792.1 : 746,714 - 780,166 on strand -	lethal giant larvae homolog 1 (Drosophila)
	flii (ENSPFOG00000006633)	KI519792.1 : 722,256 - 738,120 on strand +	flightless I actin binding protein
	desi1a (ENSPFOG00000006533)	KI519792.1 : 713,421 - 720,985 on strand -	desumoylating isopeptidase 1a
	ENSPFOG00000006511	KI519792.1 : 581,421 - 682,707 on strand +
	ENSPFOG00000006408

## Sheet: PDIA4
	PDIA4 homo sapiens
	ZNF783 (ENSG00000204946)	7 : 149,262,171 - 149,297,302 on strand +	zinc finger family member 783
	ZNF212 (ENSG00000170260)	7 : 149,239,651 - 149,255,609 on strand +	zinc finger protein 212
	ZNF282 (ENSG00000170265)	7 : 149,195,485 - 149,226,248 on strand +	zinc finger protein 282
	ZNF398 (ENSG00000197024)	7 : 149,126,416 - 149,182,802 on strand +	zinc finger protein 398
	ZNF425 (ENSG00000204947)	7 : 149,102,784 - 149,126,346 on strand -	zinc finger protein 425
	ZNF786 (ENSG00000197362)	7 : 149,069,643 - 149,090,782 on strand -	zinc finger protein 786
	PDIA4 (ENSG00000155660)	7 : 149,003,062 - 149,028,641 on strand -	protein disulfide isomerase family A member 4
	EZH2 (ENSG00000106462)	7 : 148,807,383 - 148,884,321 on strand -	enhancer of zeste 2 polycomb repressive complex 2 subunit
	CUL1 (ENSG00000055130)	7 : 148,697,914 - 148,801,036 on strand +	cullin 1
	C7orf33 (ENSG00000170279)	7 : 148,590,565 - 148,615,860 on strand +	chromosome 7 open reading frame 33
	CNTNAP2 (ENSG00000174469)	7 : 146,116,002 - 148,420,998 on strand +	contactin associated protein-like 2
	TPK1 (ENSG00000196511)	7 : 144,451,941 - 144,836,395 on strand -	thiamin pyrophosphokinase 1
	NOBOX (ENSG00000106410)	7 : 144,397,240 - 144,410,227 on strand -	NOBOX oogenesis homeobox
